# Supplementary material for: H-assisted CO2 dissociation on PdnPt(4−n)/In2O3 catalysts: a density functional theory study
Source: Royal Society of Chemistry journal article supplement (doi:10.1039/d4cp02389g), 2024-01-01
Supplement: d4cp02389g1.pdf [file d4cp02389g1.pdf]

**Supplementary Materials for**  
**On the Mechanism of Methanol Synthesis from CO<sub>2</sub> Hydrogenation over**  
**Pt<sub>8</sub>/In<sub>2</sub>O<sub>3</sub> Catalysts:**

**A Combined Study on Density Functional Theory and Microkinetic Modeling**

Xiaowen Wang<sup>1</sup>, Jiaying Pan<sup>1, \*</sup>, Haiqiao Wei<sup>1,2, \*</sup>, Wenjia Li<sup>4</sup>, Jun Zhao<sup>2,3</sup>, Zhen Hu<sup>1</sup>

*1 State Key Laboratory of Engines, Tianjin University, Tianjin 300071, China*

*2 National Industry-Education Platform of Energy Storage, Tianjin University,*

*Tianjin 300072, China*

*3 Key Laboratory of Efficient Utilization of Low and Medium Grade Energy, Tianjin*

*University, Tianjin 300071, China*

*4 Department of Mechanical and Energy Engineering, Southern University of Science*

*and Technology, Shenzhen 518055, China*

**Corresponding author:** Haiqiao Wei

**E-mail:** whq@tju.edu.cn

**S1: The XYZ coordinations of all calculated adsorbates and transition states.**

```

cONTCAR\5)      h+co2-pt4
1.00000000000000
 10.2175998688000007    0.0000000000000000    0.0000000000000000
 0.0000000000000000    14.4497995377000006    0.0000000000000000
 0.0000000000000000    0.0000000000000000    20.9857006073000001

O   In   Pt   C   H
50  32   4    1   1

```

Selective dynamics

Direct

|                    |                    |                    |   |   |   |
|--------------------|--------------------|--------------------|---|---|---|
| 0.1819400070000015 | 0.5179200199999983 | 0.1152000000000015 | F | F | F |
| 0.6819400070000015 | 0.0179200010000002 | 0.1152000000000015 | F | F | F |
| 0.6795349610000017 | 0.0317670000000021 | 0.2518329840000035 | T | T | T |
| 0.1794640020000031 | 0.5183029800000014 | 0.2622090099999994 | T | T | T |
| 0.9183799970000024 | 0.3758610000000004 | 0.3583169939999991 | T | T | T |
| 0.4084239860000025 | 0.8819649630000015 | 0.3576740070000000 | T | T | T |
| 0.4254840190000024 | 0.6725980089999979 | 0.3517940070000023 | T | T | T |
| 0.9183309949999980 | 0.1617740020000014 | 0.3497880170000016 | T | T | T |
| 0.9545099699999966 | 0.3958000000000013 | 0.1866899999999987 | F | F | F |
| 0.4545100160000004 | 0.8957999670000021 | 0.1866899999999987 | F | F | F |
| 0.6423570059999975 | 0.7837669580000011 | 0.2660990159999983 | T | T | T |
| 0.1458420020000020 | 0.2863459730000031 | 0.2731930079999998 | T | T | T |
| 0.4545100160000004 | 0.1542000070000000 | 0.1726800109999971 | F | F | F |
| 0.9545099699999966 | 0.6542000230000014 | 0.1726800109999971 | F | F | F |
| 0.1454900069999994 | 0.7638599679999984 | 0.1037499959999977 | F | F | F |
| 0.6454899840000010 | 0.2638599839999998 | 0.1037499959999977 | F | F | F |
| 0.1903399939999986 | 0.2862900060000015 | 0.1125700079999987 | F | F | F |
| 0.6903399589999992 | 0.7862899730000024 | 0.1125700079999987 | F | F | F |
| 0.9096599470000015 | 0.8817800340000019 | 0.1725899979999994 | F | F | F |
| 0.4096599940000019 | 0.3817800010000028 | 0.1725899979999994 | F | F | F |
| 0.4096599940000019 | 0.6682199560000015 | 0.1867800019999990 | F | F | F |
| 0.9096599470000015 | 0.1682200059999985 | 0.1867800019999990 | F | F | F |
| 0.6900830040000017 | 0.2665229999999994 | 0.2532990079999990 | T | T | T |
| 0.1866659920000018 | 0.7614599750000011 | 0.2534469960000010 | T | T | T |
| 0.4180599930000000 | 0.7820899849999989 | 0.0870100030000032 | F | F | F |
| 0.9180600400000003 | 0.2820900179999981 | 0.0870100030000032 | F | F | F |
| 0.9151170490000027 | 0.7649319920000011 | 0.2874130049999977 | T | T | T |
| 0.4189080009999984 | 0.2674680080000016 | 0.2827900090000028 | T | T | T |
| 0.6819400070000015 | 0.4224300249999970 | 0.1752299990000026 | F | F | F |
| 0.1819400070000015 | 0.9224299589999987 | 0.1752299990000026 | F | F | F |
| 0.1819400070000015 | 0.1275800049999987 | 0.1841400010000029 | F | F | F |
| 0.6819400070000015 | 0.6275799969999980 | 0.1841400010000029 | F | F | F |
| 0.6449750000000023 | 0.3885569899999979 | 0.3506140080000009 | T | T | T |

|                    |                    |                    |   |   |   |
|--------------------|--------------------|--------------------|---|---|---|
| 0.1362400049999977 | 0.8966400039999982 | 0.3518660129999986 | T | T | T |
| 0.9572399669999996 | 0.0116190000000032 | 0.2701899999999995 | T | T | T |
| 0.4554730150000026 | 0.5140450130000005 | 0.2719370040000015 | T | T | T |
| 0.1519750109999976 | 0.6505040059999985 | 0.3636380100000025 | T | T | T |
| 0.6440490089999997 | 0.1508329950000018 | 0.3627519879999994 | T | T | T |
| 0.4545100160000004 | 0.5361400390000028 | 0.0984700050000029 | F | F | F |
| 0.9545099699999966 | 0.0361399980000030 | 0.0984700050000029 | F | F | F |
| 0.4096599940000019 | 0.0137100000000032 | 0.0896599969999983 | F | F | F |
| 0.9096599470000015 | 0.5137100339999989 | 0.0896599969999983 | F | F | F |
| 0.7083369969999964 | 0.9189570180000004 | 0.3600470020000017 | T | T | T |
| 0.3171359859999967 | 0.3984469939999968 | 0.3942170320000002 | T | T | T |
| 0.2022740020000029 | 0.1315979999999968 | 0.3575119990000033 | T | T | T |
| 0.6874589900000032 | 0.6324040060000016 | 0.3527610100000018 | T | T | T |
| 0.9006829429999996 | 0.5373659730000000 | 0.2826890099999986 | T | T | T |
| 0.4070350000000005 | 0.0383120010000013 | 0.2783080029999994 | T | T | T |
| 0.7211280080000009 | 0.7638080259999995 | 0.4547419960000028 | T | T | T |
| 0.5510929699999991 | 0.7378609929999982 | 0.5230370210000004 | T | T | T |
| 0.7999999999999972 | 0.7581899819999975 | 0.1902599909999978 | F | F | F |
| 0.3000000230000026 | 0.7918100090000024 | 0.1691199950000026 | F | F | F |
| 0.3000000230000026 | 0.2581899979999989 | 0.1902599909999978 | F | F | F |
| 0.7999999999999972 | 0.2918100090000024 | 0.1691199950000026 | F | F | F |
| 0.8336300499999965 | 0.0250000010000022 | 0.1796899989999972 | F | F | F |
| 0.7741730159999989 | 0.2652699900000002 | 0.3493959950000018 | T | T | T |
| 0.3336300030000032 | 0.5249999790000004 | 0.1796899989999972 | F | F | F |
| 0.2642619929999981 | 0.7754599760000005 | 0.3509489979999998 | T | T | T |
| 0.5483459849999974 | 0.9170359809999979 | 0.2815040119999992 | T | T | T |
| 0.5499999999999972 | 0.1331900059999995 | 0.0905399970000005 | F | F | F |
| 0.0344269969999971 | 0.4115309929999995 | 0.2777810119999984 | T | T | T |
| 0.0499999999999972 | 0.6331899899999982 | 0.0905399970000005 | F | F | F |
| 0.7936700169999966 | 0.0449090019999971 | 0.3403450030000030 | T | T | T |
| 0.2820009790000029 | 0.9990399770000025 | 0.3537909980000009 | T | T | T |
| 0.3003909859999965 | 0.5452160099999972 | 0.3451530009999999 | T | T | T |
| 0.7979819729999988 | 0.4975579990000014 | 0.3677900240000014 | T | T | T |
| 0.7593270160000003 | 0.7800970090000021 | 0.3528270170000027 | T | T | T |
| 0.8336300499999965 | 0.5249999790000004 | 0.1796899989999972 | F | F | F |
| 0.2740240039999975 | 0.2663800130000027 | 0.3534420109999985 | T | T | T |
| 0.3336300030000032 | 0.0250000010000022 | 0.1796899989999972 | F | F | F |
| 0.0470990020000031 | 0.8807659570000013 | 0.2586269990000005 | T | T | T |
| 0.0499999999999972 | 0.1668099999999981 | 0.1116699999999966 | F | F | F |
| 0.5489579919999983 | 0.3820760070000020 | 0.2564390069999973 | T | T | T |
| 0.5499999999999972 | 0.6668099509999976 | 0.1116699999999966 | F | F | F |
| 0.5499999999999972 | 0.4000000200000002 | 0.1011099950000016 | F | F | F |
| 0.0491270010000022 | 0.1470210000000023 | 0.2712369839999980 | T | T | T |
| 0.5499999999999972 | 0.8999999540000019 | 0.1011099950000016 | F | F | F |

|                    |                    |                    |   |   |   |
|--------------------|--------------------|--------------------|---|---|---|
| 0.0484780009999994 | 0.6472949959999994 | 0.2723709939999992 | T | T | T |
| 0.0499999999999972 | 0.4000000200000002 | 0.1011099950000016 | F | F | F |
| 0.0499999999999972 | 0.8999999540000019 | 0.1011099950000016 | F | F | F |
| 0.5488839759999991 | 0.6501029949999975 | 0.2659719780000032 | T | T | T |
| 0.5516539679999966 | 0.1496369919999978 | 0.2690930039999984 | T | T | T |
| 0.3391810010000000 | 0.5188360220000021 | 0.4741110040000009 | T | T | T |
| 0.5153120279999968 | 0.4264680169999977 | 0.4207790079999967 | T | T | T |
| 0.5472400419999985 | 0.6133379770000005 | 0.4225340110000033 | T | T | T |
| 0.6986430279999993 | 0.5035199980000016 | 0.4821799959999993 | T | T | T |
| 0.6164500329999996 | 0.7259269629999991 | 0.4751920260000020 | T | T | T |
| 0.3883239860000032 | 0.5993470180000031 | 0.5171359810000027 | T | T | T |

CONTCAR(5) h+co2-pdpt3

1.000000000000000

|                     |                     |                     |
|---------------------|---------------------|---------------------|
| 10.2175998688000007 | 0.0000000000000000  | 0.0000000000000000  |
| 0.0000000000000000  | 14.4497995377000006 | 0.0000000000000000  |
| 0.0000000000000000  | 0.0000000000000000  | 20.9857006073000001 |

| O  | In | Pd | Pt | C | H |
|----|----|----|----|---|---|
| 50 | 32 | 1  | 3  | 1 | 1 |

Selective dynamics

Direct

|                    |                    |                    |   |   |   |
|--------------------|--------------------|--------------------|---|---|---|
| 0.1819400070339938 | 0.5179200200303384 | 0.1152000000018631 | F | F | F |
| 0.6819400070927131 | 0.0179200014037875 | 0.1152000000018631 | F | F | F |
| 0.6793022729810403 | 0.0325017735061550 | 0.2516459749950144 | T | T | T |
| 0.1790921805372534 | 0.5177045559681588 | 0.2627485321848937 | T | T | T |
| 0.9113962616250717 | 0.3775937211866349 | 0.3586831194457218 | T | T | T |
| 0.4081075405460126 | 0.8826005485290622 | 0.3576920713664649 | T | T | T |
| 0.4246295467599381 | 0.6751492867787263 | 0.3513730620147015 | T | T | T |
| 0.9157075931600005 | 0.1630515619290946 | 0.3496462115844921 | T | T | T |
| 0.9545099696828743 | 0.395799996524748  | 0.1866900003632566 | F | F | F |
| 0.4545100164061751 | 0.8957999666520209 | 0.1866900003632566 | F | F | F |
| 0.6428187612763736 | 0.7845601261232105 | 0.2654338436408068 | T | T | T |
| 0.1435260302638355 | 0.2863727862366758 | 0.2733954866296600 | T | T | T |
| 0.4545100164061751 | 0.1542000069403500 | 0.1726800107755011 | F | F | F |
| 0.9545099696828743 | 0.6542000234215450 | 0.1726800107755011 | F | F | F |
| 0.1454900069574379 | 0.7638599674827660 | 0.1037499962351802 | F | F | F |
| 0.6454899836251471 | 0.2638599840124058 | 0.1037499962351802 | F | F | F |
| 0.1903399943208370 | 0.2862900056299651 | 0.1125700076069052 | F | F | F |
| 0.6903399592441062 | 0.7862899726295041 | 0.1125700076069052 | F | F | F |
| 0.9096599473797582 | 0.8817800337476598 | 0.1725899975309915 | F | F | F |
| 0.4096599940051888 | 0.3817800007264367 | 0.1725899975309915 | F | F | F |
| 0.4096599940051888 | 0.6682199563951130 | 0.1867800022190593 | F | F | F |
| 0.9096599473797582 | 0.1682200058663881 | 0.1867800022190593 | F | F | F |

|                    |                    |                    |   |   |   |
|--------------------|--------------------|--------------------|---|---|---|
| 0.6899878406662197 | 0.2677827539385902 | 0.2539473545301334 | T | T | T |
| 0.1864246135165786 | 0.7610229304383651 | 0.2534676066423884 | T | T | T |
| 0.4180599929386020 | 0.7820899854364924 | 0.0870100033908230 | F | F | F |
| 0.9180600395836080 | 0.2820900184369464 | 0.0870100033908230 | F | F | F |
| 0.9163896883337088 | 0.7646066749156262 | 0.2870270828514947 | T | T | T |
| 0.4178618110869934 | 0.2670117363081346 | 0.2818623507818998 | T | T | T |
| 0.6819400070927131 | 0.4224300249338668 | 0.1752299989317905 | F | F | F |
| 0.1819400070339938 | 0.9224299589225708 | 0.1752299989317905 | F | F | F |
| 0.1819400070339938 | 0.1275800053274239 | 0.1841400008182603 | F | F | F |
| 0.6819400070927131 | 0.6275799970331946 | 0.1841400008182603 | F | F | F |
| 0.6360274919899709 | 0.3897884022969862 | 0.3527359847107832 | T | T | T |
| 0.1358334034768873 | 0.8966357181629050 | 0.3517457027719146 | T | T | T |
| 0.9568735807349285 | 0.0117830801777359 | 0.2703242863461668 | T | T | T |
| 0.4553497239173794 | 0.5147382312958442 | 0.2711249757242413 | T | T | T |
| 0.1532654635514135 | 0.6492039613883591 | 0.3644801076329713 | T | T | T |
| 0.6416856587125324 | 0.1511145704685504 | 0.3629832930552368 | T | T | T |
| 0.4545100164061751 | 0.5361400390910305 | 0.0984700048222891 | F | F | F |
| 0.9545099696828743 | 0.0361399978344039 | 0.0984700048222891 | F | F | F |
| 0.4096599940051888 | 0.0137099999541945 | 0.0896599967858833 | F | F | F |
| 0.9096599473797582 | 0.5137100339442853 | 0.0896599967858833 | F | F | F |
| 0.7082657841890381 | 0.9188670362668461 | 0.3594554153828682 | T | T | T |
| 0.3092106555920111 | 0.3973500304775968 | 0.3924283960151911 | T | T | T |
| 0.2006939633017524 | 0.1311926384102620 | 0.3572637509352319 | T | T | T |
| 0.6859083151591321 | 0.6332229101782048 | 0.3516999922908468 | T | T | T |
| 0.8995959882247320 | 0.5373126850909458 | 0.2828468338556007 | T | T | T |
| 0.4067777482766104 | 0.0385739743527154 | 0.2781594921077399 | T | T | T |
| 0.7336967013264015 | 0.7637825458633714 | 0.4540828195986890 | T | T | T |
| 0.5545116121239886 | 0.7660660339084799 | 0.5190476397365273 | T | T | T |
| 0.799999999960821  | 0.7581899815576136 | 0.1902599906343454 | F | F | F |
| 0.3000000233283728 | 0.7918100085159523 | 0.1691199954394378 | F | F | F |
| 0.3000000233283728 | 0.2581899980872535 | 0.1902599906343454 | F | F | F |
| 0.799999999960821  | 0.2918100085747710 | 0.1691199954394378 | F | F | F |
| 0.8336300498524380 | 0.0250000012150693 | 0.1796899987074170 | F | F | F |
| 0.7702005657044069 | 0.2663411468072141 | 0.3505362902687352 | T | T | T |
| 0.3336300032074320 | 0.5249999785261750 | 0.1796899987074170 | F | F | F |
| 0.2635050975184257 | 0.7756799815971007 | 0.3508609212448732 | T | T | T |
| 0.5481359557800332 | 0.9173374281775750 | 0.2816501755689913 | T | T | T |
| 0.5500000000156575 | 0.1331900063373723 | 0.0905399972845800 | F | F | F |
| 0.0322368587261153 | 0.4115374564187562 | 0.2787233589842515 | T | T | T |
| 0.0499999999569383 | 0.6331899898077324 | 0.0905399972845800 | F | F | F |
| 0.7925842774928640 | 0.0455294258120702 | 0.3402861967705064 | T | T | T |
| 0.2817817531530196 | 0.9991472635729295 | 0.3536184024693654 | T | T | T |
| 0.3025280285204985 | 0.5440283458778765 | 0.3455498072734287 | T | T | T |
| 0.7902505885027225 | 0.4993677144008259 | 0.3673192792197923 | T | T | T |

|                    |                    |                    |   |   |   |
|--------------------|--------------------|--------------------|---|---|---|
| 0.7606989036945890 | 0.7797976959303199 | 0.3517707872903202 | T | T | T |
| 0.8336300498524380 | 0.5249999785261750 | 0.1796899987074170 | F | F | F |
| 0.2738213983194342 | 0.2654375516040375 | 0.3528837502867077 | T | T | T |
| 0.3336300032074320 | 0.0250000012150693 | 0.1796899987074170 | F | F | F |
| 0.0470663154734083 | 0.8808151224689524 | 0.2585287227737254 | T | T | T |
| 0.0499999999569383 | 0.1668100002848689 | 0.1116700004375772 | F | F | F |
| 0.5481831052378183 | 0.3824277999790979 | 0.2565934574382496 | T | T | T |
| 0.5500000000156575 | 0.6668099508135938 | 0.1116700004375772 | F | F | F |
| 0.5500000000156575 | 0.4000000197871287 | 0.1011099948343812 | F | F | F |
| 0.0477995858928395 | 0.1474200372462562 | 0.2715402014888042 | T | T | T |
| 0.5500000000156575 | 0.8999999537758328 | 0.1011099948343812 | F | F | F |
| 0.0489818499675962 | 0.6463814118930600 | 0.2726722114397830 | T | T | T |
| 0.0499999999569383 | 0.4000000197871287 | 0.1011099948343812 | F | F | F |
| 0.0499999999569383 | 0.8999999537758328 | 0.1011099948343812 | F | F | F |
| 0.5492226851235458 | 0.6506004840264268 | 0.2661094428354076 | T | T | T |
| 0.5513468000705046 | 0.1500372091061806 | 0.2687384668240540 | T | T | T |
| 0.3331038251939518 | 0.5326204901321319 | 0.4772030381931955 | T | T | T |
| 0.4998620458556289 | 0.4343948179416799 | 0.4196184653118991 | T | T | T |
| 0.5453701082493012 | 0.6229493446396219 | 0.4255454789184299 | T | T | T |
| 0.6883939804656833 | 0.5057628761225672 | 0.4822131634072022 | T | T | T |
| 0.6211329770925218 | 0.7394867955885402 | 0.4747915255707440 | T | T | T |
| 0.4380980786268225 | 0.6255820940392027 | 0.4873869378497346 | T | T | T |

CONTCAR h+co2-pd2pt2

1.0000000000000000

10.2175998688000007 0.0000000000000000 0.0000000000000000

0.0000000000000000 14.4497995377000006 0.0000000000000000

0.0000000000000000 0.0000000000000000 20.9857006073000001

| O  | In | Pd | Pt | C | H |
|----|----|----|----|---|---|
| 50 | 32 | 2  | 2  | 1 | 1 |

Selective dynamics

Direct

|                    |                    |                    |   |   |   |
|--------------------|--------------------|--------------------|---|---|---|
| 0.1819400070339938 | 0.5179200200303384 | 0.1152000000018631 | F | F | F |
| 0.6819400070927131 | 0.0179200014037875 | 0.1152000000018631 | F | F | F |
| 0.6792452261025446 | 0.0319602302091866 | 0.2518217538134095 | T | T | T |
| 0.1790162003688494 | 0.5182363554959650 | 0.2623472614396221 | T | T | T |
| 0.9155550706407638 | 0.3777165278064132 | 0.3591655701668941 | T | T | T |
| 0.4080943595481301 | 0.8824619398344851 | 0.3577181334211730 | T | T | T |
| 0.4243573626621213 | 0.6738742375205860 | 0.3516990917728862 | T | T | T |
| 0.9163328864208893 | 0.1631127238267567 | 0.3494068190261572 | T | T | T |
| 0.9545099696828743 | 0.3957999996524748 | 0.1866900003632566 | F | F | F |
| 0.4545100164061751 | 0.8957999666520209 | 0.1866900003632566 | F | F | F |
| 0.6424276637610546 | 0.7844912546116944 | 0.2656655154946606 | T | T | T |

|                    |                    |                    |   |   |   |
|--------------------|--------------------|--------------------|---|---|---|
| 0.1439826762055674 | 0.2866317057030727 | 0.2727034060273184 | T | T | T |
| 0.4545100164061751 | 0.1542000069403500 | 0.1726800107755011 | F | F | F |
| 0.9545099696828743 | 0.6542000234215450 | 0.1726800107755011 | F | F | F |
| 0.1454900069574379 | 0.7638599674827660 | 0.1037499962351802 | F | F | F |
| 0.6454899836251471 | 0.2638599840124058 | 0.1037499962351802 | F | F | F |
| 0.1903399943208370 | 0.2862900056299651 | 0.1125700076069052 | F | F | F |
| 0.6903399592441062 | 0.7862899726295041 | 0.1125700076069052 | F | F | F |
| 0.9096599473797582 | 0.8817800337476598 | 0.1725899975309915 | F | F | F |
| 0.4096599940051888 | 0.3817800007264367 | 0.1725899975309915 | F | F | F |
| 0.4096599940051888 | 0.6682199563951130 | 0.1867800022190593 | F | F | F |
| 0.9096599473797582 | 0.1682200058663881 | 0.1867800022190593 | F | F | F |
| 0.6895168587652165 | 0.2665366878389293 | 0.2531992334674058 | T | T | T |
| 0.1863506220327125 | 0.7611296806542711 | 0.2535053366052509 | T | T | T |
| 0.4180599929386020 | 0.7820899854364924 | 0.0870100033908230 | F | F | F |
| 0.9180600395836080 | 0.2820900184369464 | 0.0870100033908230 | F | F | F |
| 0.9161375472280113 | 0.7647486556841656 | 0.2871862248304495 | T | T | T |
| 0.4177541619269789 | 0.2671825760124094 | 0.2822025836942075 | T | T | T |
| 0.6819400070927131 | 0.4224300249338668 | 0.1752299989317905 | F | F | F |
| 0.1819400070339938 | 0.9224299589225708 | 0.1752299989317905 | F | F | F |
| 0.1819400070339938 | 0.1275800053274239 | 0.1841400008182603 | F | F | F |
| 0.6819400070927131 | 0.6275799970331946 | 0.1841400008182603 | F | F | F |
| 0.6412616902923602 | 0.3905743296920647 | 0.3506083436775853 | T | T | T |
| 0.1360070256926349 | 0.8965681078860896 | 0.3518526505045401 | T | T | T |
| 0.9570459935808273 | 0.0117440231280881 | 0.2703265381858557 | T | T | T |
| 0.4550568614739205 | 0.5143904187350472 | 0.2718414258021511 | T | T | T |
| 0.1526863837424273 | 0.6493834986254186 | 0.3644295015200214 | T | T | T |
| 0.6428348739195897 | 0.1517189772130436 | 0.3629180180090970 | T | T | T |
| 0.4545100164061751 | 0.5361400390910305 | 0.0984700048222891 | F | F | F |
| 0.9545099696828743 | 0.0361399978344039 | 0.0984700048222891 | F | F | F |
| 0.4096599940051888 | 0.0137099999541945 | 0.0896599967858833 | F | F | F |
| 0.9096599473797582 | 0.5137100339442853 | 0.0896599967858833 | F | F | F |
| 0.7086997671112769 | 0.9187639655245690 | 0.3601707353372845 | T | T | T |
| 0.3086670579715545 | 0.3982020497203465 | 0.3931661395635189 | T | T | T |
| 0.2013858256509451 | 0.1318660684512167 | 0.3570275587310405 | T | T | T |
| 0.6862576717814406 | 0.6334600897627922 | 0.3520211482136943 | T | T | T |
| 0.8994701326930468 | 0.5375211079985576 | 0.2827795136905280 | T | T | T |
| 0.4067698425187487 | 0.0383250607331505 | 0.2781654092899686 | T | T | T |
| 0.7307014077703258 | 0.7627092718229420 | 0.4550121438196939 | T | T | T |
| 0.5491033868423187 | 0.7633988280544841 | 0.5188051177092561 | T | T | T |
| 0.7999999999960821 | 0.7581899815576136 | 0.1902599906343454 | F | F | F |
| 0.3000000233283728 | 0.7918100085159523 | 0.1691199954394378 | F | F | F |
| 0.3000000233283728 | 0.2581899980872535 | 0.1902599906343454 | F | F | F |
| 0.7999999999960821 | 0.2918100085747710 | 0.1691199954394378 | F | F | F |
| 0.8336300498524380 | 0.0250000012150693 | 0.1796899987074170 | F | F | F |

|                    |                    |                    |   |   |   |
|--------------------|--------------------|--------------------|---|---|---|
| 0.7720392546436798 | 0.2671036918155281 | 0.3493552873002841 | T | T | T |
| 0.3336300032074320 | 0.5249999785261750 | 0.1796899987074170 | F | F | F |
| 0.2638643762214272 | 0.7753447119337693 | 0.3508998212834626 | T | T | T |
| 0.5480789482973947 | 0.9172262328245466 | 0.2816732044309234 | T | T | T |
| 0.5500000000156575 | 0.1331900063373723 | 0.0905399972845800 | F | F | F |
| 0.0328486629692080 | 0.4120706299761494 | 0.2785072207780246 | T | T | T |
| 0.0499999999569383 | 0.6331899898077324 | 0.0905399972845800 | F | F | F |
| 0.7926434525067876 | 0.0457066474577843 | 0.3403407086080890 | T | T | T |
| 0.2815272648225502 | 0.9993702475227337 | 0.3535618392783135 | T | T | T |
| 0.3013043760081331 | 0.5433036394675383 | 0.3455303167874604 | T | T | T |
| 0.7913191349012720 | 0.4985886244528714 | 0.3674015110376061 | T | T | T |
| 0.7603710118088500 | 0.7797865223758080 | 0.3519868100397048 | T | T | T |
| 0.8336300498524380 | 0.5249999785261750 | 0.1796899987074170 | F | F | F |
| 0.2725448937552173 | 0.2671339311636913 | 0.3529199065618727 | T | T | T |
| 0.3336300032074320 | 0.0250000012150693 | 0.1796899987074170 | F | F | F |
| 0.0470427397790871 | 0.8807891449556493 | 0.2586277958055447 | T | T | T |
| 0.0499999999569383 | 0.1668100002848689 | 0.1116700004375772 | F | F | F |
| 0.5485561521066060 | 0.3822506915835859 | 0.2566387409918605 | T | T | T |
| 0.5500000000156575 | 0.6668099508135938 | 0.1116700004375772 | F | F | F |
| 0.5500000000156575 | 0.4000000197871287 | 0.1011099948343812 | F | F | F |
| 0.0482023326174854 | 0.1474942032648840 | 0.2713784060751294 | T | T | T |
| 0.5500000000156575 | 0.8999999537758328 | 0.1011099948343812 | F | F | F |
| 0.0488123842800405 | 0.6465368983757855 | 0.2727388789744012 | T | T | T |
| 0.0499999999569383 | 0.4000000197871287 | 0.1011099948343812 | F | F | F |
| 0.0499999999569383 | 0.8999999537758328 | 0.1011099948343812 | F | F | F |
| 0.5491574830457537 | 0.6502640557793029 | 0.2664142447158966 | T | T | T |
| 0.5510142184125826 | 0.1499247989762367 | 0.2690838952359726 | T | T | T |
| 0.3347596394729493 | 0.5264965106308424 | 0.4742807889944061 | T | T | T |
| 0.5060304991619375 | 0.4301347469704453 | 0.4201013502605875 | T | T | T |
| 0.5454815859360238 | 0.6206919343476400 | 0.4252250713725303 | T | T | T |
| 0.6918171979980272 | 0.5065071177319282 | 0.4828243469527465 | T | T | T |
| 0.6189568920856061 | 0.7378984747976673 | 0.4755663405875907 | T | T | T |
| 0.4376499298394592 | 0.6193961577522842 | 0.4876038833753782 | T | T | T |

CONTCAR\3) h+co2-pd3pt

1.0000000000000000

10.2175998688000007 0.0000000000000000 0.0000000000000000

0.0000000000000000 14.4497995377000006 0.0000000000000000

0.0000000000000000 0.0000000000000000 20.9857006073000001

| O  | In | Pd | Pt | C | H |
|----|----|----|----|---|---|
| 50 | 32 | 3  | 1  | 1 | 1 |

Selective dynamics

Direct



|                    |                    |                    |   |   |   |
|--------------------|--------------------|--------------------|---|---|---|
| 0.1819400070339938 | 0.5179200200303384 | 0.1152000000018631 | F | F | F |
| 0.6819400070927131 | 0.0179200014037875 | 0.1152000000018631 | F | F | F |
| 0.6791774977193654 | 0.0315311850833240 | 0.2522231859225670 | T | T | T |
| 0.1794215487606081 | 0.5180746897476709 | 0.2624589497265788 | T | T | T |
| 0.9143937654308942 | 0.3786826433797827 | 0.3593151711235265 | T | T | T |
| 0.4084058182553676 | 0.8833502123908161 | 0.3582090644017981 | T | T | T |
| 0.4223292404284749 | 0.6750250710323229 | 0.3497393727605385 | T | T | T |
| 0.9155475860447595 | 0.1637614061911421 | 0.3492412122096411 | T | T | T |
| 0.9545099696828743 | 0.395799996524748  | 0.1866900003632566 | F | F | F |
| 0.4545100164061751 | 0.8957999666520209 | 0.1866900003632566 | F | F | F |
| 0.6424739691472965 | 0.7854907537225131 | 0.2649463067680102 | T | T | T |
| 0.1434029964612407 | 0.2867331356802296 | 0.2726016491956003 | T | T | T |
| 0.4545100164061751 | 0.1542000069403500 | 0.1726800107755011 | F | F | F |
| 0.9545099696828743 | 0.6542000234215450 | 0.1726800107755011 | F | F | F |
| 0.1454900069574379 | 0.7638599674827660 | 0.1037499962351802 | F | F | F |
| 0.6454899836251471 | 0.2638599840124058 | 0.1037499962351802 | F | F | F |
| 0.1903399943208370 | 0.2862900056299651 | 0.1125700076069052 | F | F | F |
| 0.6903399592441062 | 0.7862899726295041 | 0.1125700076069052 | F | F | F |
| 0.9096599473797582 | 0.8817800337476598 | 0.1725899975309915 | F | F | F |
| 0.4096599940051888 | 0.3817800007264367 | 0.1725899975309915 | F | F | F |
| 0.4096599940051888 | 0.6682199563951130 | 0.1867800022190593 | F | F | F |
| 0.9096599473797582 | 0.1682200058663881 | 0.1867800022190593 | F | F | F |
| 0.6894138681783559 | 0.2665339935830175 | 0.2531671154634552 | T | T | T |
| 0.1858927053509092 | 0.7613819428613837 | 0.2531064537968533 | T | T | T |
| 0.4180599929386020 | 0.7820899854364924 | 0.0870100033908230 | F | F | F |
| 0.9180600395836080 | 0.2820900184369464 | 0.0870100033908230 | F | F | F |
| 0.9166237510677178 | 0.7651598487809963 | 0.2865355792643669 | T | T | T |
| 0.4176702680549269 | 0.2670581851675351 | 0.2820242124879542 | T | T | T |
| 0.6819400070927131 | 0.4224300249338668 | 0.1752299989317905 | F | F | F |
| 0.1819400070339938 | 0.9224299589225708 | 0.1752299989317905 | F | F | F |
| 0.1819400070339938 | 0.1275800053274239 | 0.1841400008182603 | F | F | F |
| 0.6819400070927131 | 0.6275799970331946 | 0.1841400008182603 | F | F | F |
| 0.6410743542615052 | 0.3915396129010489 | 0.3504664805447533 | T | T | T |
| 0.1364582437292867 | 0.8968665251887060 | 0.3515629487766248 | T | T | T |
| 0.9568214459690410 | 0.0119432207777379 | 0.2703723079860509 | T | T | T |
| 0.4556196384778417 | 0.5144687134328265 | 0.2714104794516743 | T | T | T |
| 0.1511837687961872 | 0.6497994561117579 | 0.3643564736871596 | T | T | T |
| 0.6427510248490691 | 0.1518587333010899 | 0.3629941997782851 | T | T | T |
| 0.4545100164061751 | 0.5361400390910305 | 0.0984700048222891 | F | F | F |
| 0.9545099696828743 | 0.0361399978344039 | 0.0984700048222891 | F | F | F |
| 0.4096599940051888 | 0.0137099999541945 | 0.0896599967858833 | F | F | F |
| 0.9096599473797582 | 0.5137100339442853 | 0.0896599967858833 | F | F | F |
| 0.7097346408295238 | 0.9181606813459666 | 0.3613502594601314 | T | T | T |
| 0.3082098848897346 | 0.3981697556086274 | 0.3927803006078463 | T | T | T |

|                     |                    |                    |   |   |   |
|---------------------|--------------------|--------------------|---|---|---|
| 0.2012165328259528  | 0.1322545345860959 | 0.3569375444222445 | T | T | T |
| 0.68911111747819920 | 0.6362487361239602 | 0.3513828985255643 | T | T | T |
| 0.8995068593723161  | 0.5374931062634829 | 0.2825333484303485 | T | T | T |
| 0.4066540695148007  | 0.0385734493574574 | 0.2780651911751448 | T | T | T |
| 0.5553544392822829  | 0.7578931157275406 | 0.5231603605128186 | T | T | T |
| 0.7370844058867974  | 0.7609475311124498 | 0.4576687812794589 | T | T | T |
| 0.799999999960821   | 0.7581899815576136 | 0.1902599906343454 | F | F | F |
| 0.3000000233283728  | 0.7918100085159523 | 0.1691199954394378 | F | F | F |
| 0.3000000233283728  | 0.2581899980872535 | 0.1902599906343454 | F | F | F |
| 0.799999999960821   | 0.2918100085747710 | 0.1691199954394378 | F | F | F |
| 0.8336300498524380  | 0.0250000012150693 | 0.1796899987074170 | F | F | F |
| 0.7713133838552864  | 0.2680772999201579 | 0.3497165790885859 | T | T | T |
| 0.3336300032074320  | 0.5249999785261750 | 0.1796899987074170 | F | F | F |
| 0.2640618073085221  | 0.7753802057488741 | 0.3503501665970461 | T | T | T |
| 0.5474991493329497  | 0.9172703807698142 | 0.2818128100801403 | T | T | T |
| 0.5500000000156575  | 0.1331900063373723 | 0.0905399972845800 | F | F | F |
| 0.0323602658760365  | 0.4122884560006526 | 0.2788907485424801 | T | T | T |
| 0.0499999999569383  | 0.6331899898077324 | 0.0905399972845800 | F | F | F |
| 0.7926454953220698  | 0.0457852992308148 | 0.3405246110696751 | T | T | T |
| 0.2814824516825354  | 0.9997483088090249 | 0.3535162663570546 | T | T | T |
| 0.3023997001840470  | 0.5445089151538838 | 0.3457040447073609 | T | T | T |
| 0.7903945694471304  | 0.5005671708109318 | 0.3677038291960812 | T | T | T |
| 0.7607874771092469  | 0.7797181907744459 | 0.3510503494392836 | T | T | T |
| 0.8336300498524380  | 0.5249999785261750 | 0.1796899987074170 | F | F | F |
| 0.2724722673944413  | 0.2675703997023220 | 0.3528046984889244 | T | T | T |
| 0.3336300032074320  | 0.0250000012150693 | 0.1796899987074170 | F | F | F |
| 0.0471926435984145  | 0.8809895372261494 | 0.2585265699088524 | T | T | T |
| 0.0499999999569383  | 0.1668100002848689 | 0.1116700004375772 | F | F | F |
| 0.5484273505061310  | 0.3824636126977197 | 0.2569062766365846 | T | T | T |
| 0.5500000000156575  | 0.6668099508135938 | 0.1116700004375772 | F | F | F |
| 0.5500000000156575  | 0.4000000197871287 | 0.1011099948343812 | F | F | F |
| 0.0480702108047097  | 0.1477597137313325 | 0.2715035347909520 | T | T | T |
| 0.5500000000156575  | 0.8999999537758328 | 0.1011099948343812 | F | F | F |
| 0.0489257477487683  | 0.6464503417627512 | 0.2727630160737817 | T | T | T |
| 0.0499999999569383  | 0.4000000197871287 | 0.1011099948343812 | F | F | F |
| 0.0499999999569383  | 0.8999999537758328 | 0.1011099948343812 | F | F | F |
| 0.5495360426892120  | 0.6505107914232227 | 0.2668884876395623 | T | T | T |
| 0.5511324890353038  | 0.1500700543550053 | 0.2691438578052114 | T | T | T |
| 0.3323357907751401  | 0.5262381439656565 | 0.4742281673001543 | T | T | T |
| 0.5052748523771058  | 0.4321968592713219 | 0.4197069422206923 | T | T | T |
| 0.5454713632436565  | 0.6253045572841955 | 0.4250124384772178 | T | T | T |
| 0.6892557894681772  | 0.5086452565716542 | 0.4824923484471668 | T | T | T |
| 0.6283007411372026  | 0.7385268886748051 | 0.4801108020834235 | T | T | T |
| 0.4304307439497066  | 0.6162951354812947 | 0.4866087162699770 | T | T | T |

CONTCAR\4) h+co2-pd4

1.000000000000000

10.2175998688000007 0.0000000000000000 0.0000000000000000

0.0000000000000000 14.4497995377000006 0.0000000000000000

0.0000000000000000 0.0000000000000000 20.9857006073000001

O In Pd C H

50 32 4 1 1

Selective dynamics

Direct

|                    |                    |                    |   |   |   |
|--------------------|--------------------|--------------------|---|---|---|
| 0.1819400070339938 | 0.5179200200303384 | 0.1152000000018631 | F | F | F |
| 0.6819400070927131 | 0.0179200014037875 | 0.1152000000018631 | F | F | F |
| 0.6794797029872797 | 0.0311218317433273 | 0.2522144154003101 | T | T | T |
| 0.1800602524076567 | 0.5180701758735680 | 0.2625031020104700 | T | T | T |
| 0.9151201150516997 | 0.3782816478090893 | 0.3592357893395217 | T | T | T |
| 0.4085608003186465 | 0.8831319533351518 | 0.3582884155498363 | T | T | T |
| 0.4221936282730567 | 0.6741097956651600 | 0.3494902754050457 | T | T | T |
| 0.9168252414841618 | 0.1628059579683168 | 0.3495360930198714 | T | T | T |
| 0.9545099696828743 | 0.395799996524748  | 0.1866900003632566 | F | F | F |
| 0.4545100164061751 | 0.8957999666520209 | 0.1866900003632566 | F | F | F |
| 0.6425538973799974 | 0.7849543471352831 | 0.2651810431846258 | T | T | T |
| 0.1436101823853804 | 0.2866323149870738 | 0.2725723641422988 | T | T | T |
| 0.4545100164061751 | 0.1542000069403500 | 0.1726800107755011 | F | F | F |
| 0.9545099696828743 | 0.6542000234215450 | 0.1726800107755011 | F | F | F |
| 0.1454900069574379 | 0.7638599674827660 | 0.1037499962351802 | F | F | F |
| 0.6454899836251471 | 0.2638599840124058 | 0.1037499962351802 | F | F | F |
| 0.1903399943208370 | 0.2862900056299651 | 0.1125700076069052 | F | F | F |
| 0.6903399592441062 | 0.7862899726295041 | 0.1125700076069052 | F | F | F |
| 0.9096599473797582 | 0.8817800337476598 | 0.1725899975309915 | F | F | F |
| 0.4096599940051888 | 0.3817800007264367 | 0.1725899975309915 | F | F | F |
| 0.4096599940051888 | 0.6682199563951130 | 0.1867800022190593 | F | F | F |
| 0.9096599473797582 | 0.1682200058663881 | 0.1867800022190593 | F | F | F |
| 0.6894289499328679 | 0.2655515535164028 | 0.2527992462667825 | T | T | T |
| 0.1857305894771386 | 0.7612488954617191 | 0.2529630417455522 | T | T | T |
| 0.4180599929386020 | 0.7820899854364924 | 0.0870100033908230 | F | F | F |
| 0.9180600395836080 | 0.2820900184369464 | 0.0870100033908230 | F | F | F |
| 0.9164255867240598 | 0.7650180845561252 | 0.2865025059711144 | T | T | T |
| 0.4177357499024978 | 0.2667687599497768 | 0.2820883291704277 | T | T | T |
| 0.6819400070927131 | 0.4224300249338668 | 0.1752299989317905 | F | F | F |
| 0.1819400070339938 | 0.9224299589225708 | 0.1752299989317905 | F | F | F |
| 0.1819400070339938 | 0.1275800053274239 | 0.1841400008182603 | F | F | F |
| 0.6819400070927131 | 0.6275799970331946 | 0.1841400008182603 | F | F | F |
| 0.6436645117728546 | 0.3900113691249061 | 0.3489825199619503 | T | T | T |
| 0.1368504180133812 | 0.8964364500493005 | 0.3515545134192664 | T | T | T |

|                    |                    |                    |   |   |   |
|--------------------|--------------------|--------------------|---|---|---|
| 0.9572183517445794 | 0.0117856215034280 | 0.2702622660935390 | T | T | T |
| 0.4559704264567515 | 0.5137925266654904 | 0.2712038722846444 | T | T | T |
| 0.1510540394862403 | 0.6493232262401776 | 0.3643752054683915 | T | T | T |
| 0.6437925377512812 | 0.1511586517315280 | 0.3628915831141484 | T | T | T |
| 0.4545100164061751 | 0.5361400390910305 | 0.0984700048222891 | F | F | F |
| 0.9545099696828743 | 0.0361399978344039 | 0.0984700048222891 | F | F | F |
| 0.4096599940051888 | 0.013709999541945  | 0.0896599967858833 | F | F | F |
| 0.9096599473797582 | 0.5137100339442853 | 0.0896599967858833 | F | F | F |
| 0.7099143363666087 | 0.9176449990600588 | 0.3612418441689229 | T | T | T |
| 0.3082420933028089 | 0.3982315095058695 | 0.3934202816302061 | T | T | T |
| 0.2020970398022897 | 0.1323101906039028 | 0.3568462074405119 | T | T | T |
| 0.6897809955978857 | 0.6351406824131800 | 0.3511084444390704 | T | T | T |
| 0.8997111911571309 | 0.5370666490507716 | 0.2822519036983451 | T | T | T |
| 0.4068423707207174 | 0.0382479116785959 | 0.2780160871995321 | T | T | T |
| 0.7478986497882261 | 0.7567889843733084 | 0.4567590995021931 | T | T | T |
| 0.6018661400309426 | 0.7249902138330313 | 0.5370454831879812 | T | T | T |
| 0.799999999960821  | 0.7581899815576136 | 0.1902599906343454 | F | F | F |
| 0.3000000233283728 | 0.7918100085159523 | 0.1691199954394378 | F | F | F |
| 0.3000000233283728 | 0.2581899980872535 | 0.1902599906343454 | F | F | F |
| 0.799999999960821  | 0.2918100085747710 | 0.1691199954394378 | F | F | F |
| 0.8336300498524380 | 0.0250000012150693 | 0.1796899987074170 | F | F | F |
| 0.7727683461065027 | 0.2669251890243700 | 0.3491788820284114 | T | T | T |
| 0.3336300032074320 | 0.5249999785261750 | 0.1796899987074170 | F | F | F |
| 0.2646715931500481 | 0.7746739879522409 | 0.3501377873750897 | T | T | T |
| 0.5478433701086942 | 0.9168200773415762 | 0.2819521252915749 | T | T | T |
| 0.5500000000156575 | 0.1331900063373723 | 0.0905399972845800 | F | F | F |
| 0.0331041314619256 | 0.4125113972861101 | 0.2787164642356572 | T | T | T |
| 0.0499999999569383 | 0.6331899898077324 | 0.0905399972845800 | F | F | F |
| 0.7933661736052926 | 0.0449758729613663 | 0.3405389972757789 | T | T | T |
| 0.2815694036731458 | 0.9995349838684220 | 0.3534923364720512 | T | T | T |
| 0.3030191295901190 | 0.5443543871790197 | 0.3460442102087740 | T | T | T |
| 0.7893259045236718 | 0.4998346149123094 | 0.3671211941428894 | T | T | T |
| 0.7608690015835649 | 0.7790228864559765 | 0.3515264305310097 | T | T | T |
| 0.8336300498524380 | 0.5249999785261750 | 0.1796899987074170 | F | F | F |
| 0.2724696327588489 | 0.2680369010387338 | 0.3529445335901116 | T | T | T |
| 0.3336300032074320 | 0.0250000012150693 | 0.1796899987074170 | F | F | F |
| 0.0471394220370911 | 0.8806512088586516 | 0.2586367196066206 | T | T | T |
| 0.0499999999569383 | 0.1668100002848689 | 0.1116700004375772 | F | F | F |
| 0.5485402314746466 | 0.3818805124876761 | 0.2564139178565981 | T | T | T |
| 0.5500000000156575 | 0.6668099508135938 | 0.1116700004375772 | F | F | F |
| 0.5500000000156575 | 0.4000000197871287 | 0.1011099948343812 | F | F | F |
| 0.0484863971220548 | 0.1475904434045106 | 0.2714912600697588 | T | T | T |
| 0.5500000000156575 | 0.8999999537758328 | 0.1011099948343812 | F | F | F |
| 0.0487076951083196 | 0.6463222971791467 | 0.2730131137738567 | T | T | T |

|                    |                    |                    |   |   |   |
|--------------------|--------------------|--------------------|---|---|---|
| 0.049999999569383  | 0.4000000197871287 | 0.1011099948343812 | F | F | F |
| 0.049999999569383  | 0.8999999537758328 | 0.1011099948343812 | F | F | F |
| 0.5489528017223719 | 0.6502180345149924 | 0.2670288064694191 | T | T | T |
| 0.5512928051176686 | 0.1495276785606379 | 0.2692368938167391 | T | T | T |
| 0.3379791460188102 | 0.5236154751959816 | 0.4742473649537970 | T | T | T |
| 0.5105285278323208 | 0.4329000734921493 | 0.4177555317927784 | T | T | T |
| 0.6946445868638449 | 0.5063245017120295 | 0.4843198010034158 | T | T | T |
| 0.5500641037982135 | 0.6242720472861336 | 0.4260979709920463 | T | T | T |
| 0.6525057578269227 | 0.7201447548864195 | 0.4850152905691516 | T | T | T |
| 0.4354005606693576 | 0.6136396345439294 | 0.4885040856331386 | T | T | T |

| O                   | In | Pt | C | H                   | TS1                 |
|---------------------|----|----|---|---------------------|---------------------|
| 1.000000000000000   |    |    |   |                     |                     |
| 10.2175998688000007 |    |    |   | 0.0000000000000000  | 0.0000000000000000  |
| 0.0000000000000000  |    |    |   | 14.4497995377000006 | 0.0000000000000000  |
| 0.0000000000000000  |    |    |   | 0.0000000000000000  | 20.9857006073000001 |
| O                   | In | Pt | C | H                   |                     |
| 50                  | 32 | 4  |   | 1                   | 1                   |

Selective dynamics

Direct

|                    |                    |                    |   |   |   |
|--------------------|--------------------|--------------------|---|---|---|
| 0.1819400070339938 | 0.5179200200303384 | 0.1152000000018631 | F | F | F |
| 0.6819400070927131 | 0.0179200014037875 | 0.1152000000018631 | F | F | F |
| 0.6801855913206367 | 0.0265644821108424 | 0.2537084664974500 | F | F | F |
| 0.1770398405254667 | 0.5199441786263748 | 0.2629542544046544 | F | F | F |
| 0.9105599250436214 | 0.3767538001420974 | 0.3590504468156652 | F | F | F |
| 0.4082206698485962 | 0.8827636948597686 | 0.3586746241011483 | F | F | F |
| 0.4285238298423906 | 0.6762794095794860 | 0.3507439099751721 | F | F | F |
| 0.9159699063817186 | 0.1622136980906959 | 0.3501397300921738 | F | F | F |
| 0.9545099696828743 | 0.3957999996524819 | 0.1866900003632566 | F | F | F |
| 0.4545100164061751 | 0.8957999666520351 | 0.1866900003632566 | F | F | F |
| 0.6414285207961612 | 0.7854200679465251 | 0.2649204930081552 | F | F | F |
| 0.1458446906550321 | 0.2861836681569301 | 0.2750738209023424 | F | F | F |
| 0.4545100164061751 | 0.1542000069403500 | 0.1726800107755011 | F | F | F |
| 0.9545099696828743 | 0.6542000234215450 | 0.1726800107755011 | F | F | F |
| 0.1454900069574379 | 0.7638599674827731 | 0.1037499962351802 | F | F | F |
| 0.6454899836251471 | 0.2638599840124058 | 0.1037499962351802 | F | F | F |
| 0.1903399943208370 | 0.2862900056299651 | 0.1125700076069052 | F | F | F |
| 0.6903399592441062 | 0.7862899726295112 | 0.1125700076069052 | F | F | F |
| 0.9096599473797582 | 0.8817800337476740 | 0.1725899975309915 | F | F | F |
| 0.4096599940051888 | 0.3817800007264438 | 0.1725899975309915 | F | F | F |
| 0.4096599940051888 | 0.6682199563951130 | 0.1867800022190593 | F | F | F |
| 0.9096599473797582 | 0.1682200058663881 | 0.1867800022190593 | F | F | F |
| 0.6901701288685942 | 0.2677381112512478 | 0.2540861600052011 | F | F | F |

|                    |                    |                    |   |   |   |
|--------------------|--------------------|--------------------|---|---|---|
| 0.1877327791272734 | 0.7613576196650271 | 0.2534812229719918 | F | F | F |
| 0.4180599929386020 | 0.7820899854364995 | 0.0870100033908230 | F | F | F |
| 0.9180600395836080 | 0.2820900184369464 | 0.0870100033908230 | F | F | F |
| 0.9171381413232922 | 0.7651113140790784 | 0.2851633727870251 | F | F | F |
| 0.4196480132020426 | 0.2630097040070325 | 0.2803571540177003 | F | F | F |
| 0.6819400070927131 | 0.4224300249338739 | 0.1752299989317905 | F | F | F |
| 0.1819400070339938 | 0.9224299589225851 | 0.1752299989317905 | F | F | F |
| 0.1819400070339938 | 0.1275800053274239 | 0.1841400008182603 | F | F | F |
| 0.6819400070927131 | 0.6275799970331946 | 0.1841400008182603 | F | F | F |
| 0.6330337574245277 | 0.3888882214173961 | 0.3542169598127032 | F | F | F |
| 0.1351966902427790 | 0.8960299592552659 | 0.3519472591763417 | F | F | F |
| 0.9564060093562290 | 0.0113173260273740 | 0.2705234173631794 | F | F | F |
| 0.4561412013131729 | 0.5160705049059686 | 0.2715775989121667 | F | F | F |
| 0.1504001735510698 | 0.6530576787810389 | 0.3644796790677347 | F | F | F |
| 0.6439252445430768 | 0.1478261519530690 | 0.3619073151665830 | F | F | F |
| 0.4545100164061751 | 0.5361400390910305 | 0.0984700048222891 | F | F | F |
| 0.9545099696828743 | 0.0361399978344039 | 0.0984700048222891 | F | F | F |
| 0.4096599940051888 | 0.0137099999541945 | 0.0896599967858833 | F | F | F |
| 0.9096599473797582 | 0.5137100339442853 | 0.0896599967858833 | F | F | F |
| 0.7130675855637065 | 0.9155812889708344 | 0.3679977977878153 | F | F | F |
| 0.3191329449794935 | 0.4009183324680308 | 0.3745505776686073 | F | F | F |
| 0.1967848979761584 | 0.1284445725256447 | 0.3538634516600325 | F | F | F |
| 0.6959445149525365 | 0.6404943048915044 | 0.3571781669891791 | F | F | F |
| 0.8969967951029361 | 0.5369118688288026 | 0.2837842546685962 | F | F | F |
| 0.4071831667869716 | 0.0373112527366430 | 0.2780817493719212 | F | F | F |
| 0.3983440710875428 | 0.2415204259302399 | 0.4467374102096073 | T | T | T |
| 0.5709952666814502 | 0.2947256157458256 | 0.5048227115720820 | T | T | T |
| 0.7999999999960821 | 0.7581899815576207 | 0.1902599906343454 | F | F | F |
| 0.3000000233283728 | 0.7918100085159594 | 0.1691199954394378 | F | F | F |
| 0.3000000233283728 | 0.2581899980872535 | 0.1902599906343454 | F | F | F |
| 0.7999999999960821 | 0.2918100085747710 | 0.1691199954394378 | F | F | F |
| 0.8336300498524380 | 0.0250000012150693 | 0.1796899987074170 | F | F | F |
| 0.7701844146296537 | 0.2648476798336858 | 0.3505825048031355 | F | F | F |
| 0.3336300032074320 | 0.5249999785261750 | 0.1796899987074170 | F | F | F |
| 0.2635359023093429 | 0.7761500605062892 | 0.3508537741860067 | F | F | F |
| 0.5438185518968695 | 0.9162198581797867 | 0.2812821890334689 | F | F | F |
| 0.5500000000156575 | 0.1331900063373723 | 0.0905399972845800 | F | F | F |
| 0.0335842325614877 | 0.4107040063689027 | 0.2791160078593222 | F | F | F |
| 0.0499999999569383 | 0.6331899898077324 | 0.0905399972845800 | F | F | F |
| 0.7954049545742095 | 0.0431976984068783 | 0.3414998479561007 | F | F | F |
| 0.2802645377181605 | 0.9990650655815614 | 0.3534739390039263 | F | F | F |
| 0.2953704449178360 | 0.5458857248756033 | 0.3487306230309528 | F | F | F |
| 0.7883808510543915 | 0.4963698186527594 | 0.3684324499962059 | F | F | F |
| 0.7615123682125784 | 0.7814930357631482 | 0.3487986394793339 | F | F | F |

|                    |                    |                    |   |   |   |
|--------------------|--------------------|--------------------|---|---|---|
| 0.8336300498524380 | 0.5249999785261750 | 0.1796899987074170 | F | F | F |
| 0.2823372506155835 | 0.2599474772544710 | 0.3549829187353097 | F | F | F |
| 0.3336300032074320 | 0.0250000012150693 | 0.1796899987074170 | F | F | F |
| 0.0488154085237369 | 0.8812367435913657 | 0.2579410843971743 | F | F | F |
| 0.049999999569383  | 0.1668100002848689 | 0.1116700004375772 | F | F | F |
| 0.5452009400096216 | 0.3819229267580226 | 0.2577271655328488 | F | F | F |
| 0.5500000000156575 | 0.6668099508135938 | 0.1116700004375772 | F | F | F |
| 0.5500000000156575 | 0.4000000197871358 | 0.1011099948343812 | F | F | F |
| 0.0489307517146997 | 0.1478007827257386 | 0.2722372441523930 | F | F | F |
| 0.5500000000156575 | 0.8999999537758470 | 0.1011099948343812 | F | F | F |
| 0.0485709359758175 | 0.6461582185940742 | 0.2721299810542064 | F | F | F |
| 0.049999999569383  | 0.4000000197871358 | 0.1011099948343812 | F | F | F |
| 0.049999999569383  | 0.8999999537758470 | 0.1011099948343812 | F | F | F |
| 0.5485632864223362 | 0.6501001568147871 | 0.2655397918847910 | F | F | F |
| 0.5538274902505194 | 0.1481812440047605 | 0.2680832383477139 | F | F | F |
| 0.3503658883481009 | 0.5456156448939566 | 0.4822388044014190 | F | F | F |
| 0.4888450448327006 | 0.4293020104606313 | 0.4238902062971377 | F | F | F |
| 0.6841459099235934 | 0.5043299204499263 | 0.4875334514949756 | F | F | F |
| 0.5389206273882792 | 0.6099502464087507 | 0.4187912007007384 | F | F | F |
| 0.4816246787700109 | 0.3009457401121907 | 0.4635388698556042 | T | T | T |
| 0.6265686410961564 | 0.3971338657157731 | 0.4953528594117769 | T | T | T |

| O                   | In | Pd | Pt | C                   | H | TS1                 |
|---------------------|----|----|----|---------------------|---|---------------------|
| 1.000000000000000   |    |    |    |                     |   |                     |
| 10.2175998688000007 |    |    |    | 0.0000000000000000  |   | 0.0000000000000000  |
| 0.0000000000000000  |    |    |    | 14.4497995377000006 |   | 0.0000000000000000  |
| 0.0000000000000000  |    |    |    | 0.0000000000000000  |   | 20.9857006073000001 |

| O  | In | Pd | Pt | C | H |
|----|----|----|----|---|---|
| 50 | 32 | 1  | 3  | 1 | 1 |

Selective dynamics

Direct

|                    |                    |                    |   |   |   |
|--------------------|--------------------|--------------------|---|---|---|
| 0.1819400070339938 | 0.5179200200303384 | 0.1152000000018631 | F | F | F |
| 0.6819400070927131 | 0.0179200014037875 | 0.1152000000018631 | F | F | F |
| 0.6793983911516506 | 0.0323426238926530 | 0.2517494839278598 | F | F | F |
| 0.1794432648739459 | 0.5177206537400849 | 0.2632929214139565 | F | F | F |
| 0.9102614599956738 | 0.3765061410573765 | 0.3581934031434670 | F | F | F |
| 0.4085216585878868 | 0.8821119602781877 | 0.3580020448009762 | F | F | F |
| 0.4261859710090619 | 0.6732078914896533 | 0.3505980423321802 | F | F | F |
| 0.9152868401161456 | 0.1636569790924511 | 0.3495553686541584 | F | F | F |
| 0.9545099696828743 | 0.395799996524819  | 0.1866900003632566 | F | F | F |
| 0.4545100164061751 | 0.8957999666520422 | 0.1866900003632566 | F | F | F |
| 0.6430456642134317 | 0.7851466862601200 | 0.2656003788121950 | F | F | F |
| 0.1433595366034126 | 0.2865368847346517 | 0.2732298611497086 | F | F | F |

|                    |                    |                    |   |   |   |
|--------------------|--------------------|--------------------|---|---|---|
| 0.4545100164061751 | 0.1542000069403500 | 0.1726800107755011 | F | F | F |
| 0.9545099696828743 | 0.6542000234215450 | 0.1726800107755011 | F | F | F |
| 0.1454900069574379 | 0.7638599674827873 | 0.1037499962351802 | F | F | F |
| 0.6454899836251471 | 0.2638599840124058 | 0.1037499962351802 | F | F | F |
| 0.1903399943208370 | 0.2862900056299651 | 0.1125700076069052 | F | F | F |
| 0.6903399592441062 | 0.7862899726295254 | 0.1125700076069052 | F | F | F |
| 0.9096599473797582 | 0.8817800337476811 | 0.1725899975309915 | F | F | F |
| 0.4096599940051888 | 0.3817800007264438 | 0.1725899975309915 | F | F | F |
| 0.4096599940051888 | 0.6682199563951130 | 0.1867800022190593 | F | F | F |
| 0.9096599473797582 | 0.1682200058663881 | 0.1867800022190593 | F | F | F |
| 0.6897533106013256 | 0.2681403869919166 | 0.2541253580343223 | F | F | F |
| 0.1868164451064587 | 0.7607439180304212 | 0.2536720248371154 | F | F | F |
| 0.4180599929386020 | 0.7820899854365138 | 0.0870100033908230 | F | F | F |
| 0.9180600395836080 | 0.2820900184369464 | 0.0870100033908230 | F | F | F |
| 0.9172750580298725 | 0.7647995634501257 | 0.2875813498875601 | F | F | F |
| 0.4180858255205848 | 0.2663929376547927 | 0.2813376485542705 | F | F | F |
| 0.6819400070927131 | 0.4224300249338810 | 0.1752299989317905 | F | F | F |
| 0.1819400070339938 | 0.9224299589225922 | 0.1752299989317905 | F | F | F |
| 0.1819400070339938 | 0.1275800053274239 | 0.1841400008182603 | F | F | F |
| 0.6819400070927131 | 0.6275799970331946 | 0.1841400008182603 | F | F | F |
| 0.6307859396612372 | 0.3890952216812167 | 0.3542981800771159 | F | F | F |
| 0.1364339348710075 | 0.8963565824999620 | 0.3518773594936135 | F | F | F |
| 0.9572954868270713 | 0.0118559451219227 | 0.2704568261186040 | F | F | F |
| 0.4561405633261728 | 0.5149192979046120 | 0.2715106285838189 | F | F | F |
| 0.1555630990567920 | 0.6484799823282188 | 0.3649755363952494 | F | F | F |
| 0.6409531634357961 | 0.1506866852109212 | 0.3630408420109319 | F | F | F |
| 0.4545100164061751 | 0.5361400390910305 | 0.0984700048222891 | F | F | F |
| 0.9545099696828743 | 0.0361399978344039 | 0.0984700048222891 | F | F | F |
| 0.4096599940051888 | 0.0137099999541945 | 0.0896599967858833 | F | F | F |
| 0.9096599473797582 | 0.5137100339442853 | 0.0896599967858833 | F | F | F |
| 0.7087574789685505 | 0.9199424413417532 | 0.3600623453282594 | F | F | F |
| 0.3102368209708786 | 0.3988850536976685 | 0.3903813977484631 | F | F | F |
| 0.2016118613338449 | 0.1319960332406893 | 0.3574292543411701 | F | F | F |
| 0.6928340689337134 | 0.6358061225096421 | 0.3506144938399842 | F | F | F |
| 0.8997712845672723 | 0.5367808849143145 | 0.2830896668537193 | F | F | F |
| 0.4067672707677374 | 0.0381987574656506 | 0.2782908164478428 | F | F | F |
| 0.7075155639593760 | 0.7756365385164870 | 0.4566343918851814 | T | T | T |
| 0.5357231886290492 | 0.7361854753216406 | 0.5205446533601119 | T | T | T |
| 0.799999999960821  | 0.7581899815576350 | 0.1902599906343454 | F | F | F |
| 0.3000000233283728 | 0.7918100085159736 | 0.1691199954394378 | F | F | F |
| 0.3000000233283728 | 0.2581899980872535 | 0.1902599906343454 | F | F | F |
| 0.799999999960821  | 0.2918100085747710 | 0.1691199954394378 | F | F | F |
| 0.8336300498524380 | 0.0250000012150693 | 0.1796899987074170 | F | F | F |
| 0.7681692430607399 | 0.2663152863995961 | 0.3507575753084922 | F | F | F |



|                    |                    |                    |   |   |   |
|--------------------|--------------------|--------------------|---|---|---|
| 0.3336300032074320 | 0.5249999785261750 | 0.1796899987074170 | F | F | F |
| 0.2644817041810015 | 0.7751525432821680 | 0.3506263553899984 | F | F | F |
| 0.5477936907092840 | 0.9175216028576187 | 0.2814955797500716 | F | F | F |
| 0.5500000000156575 | 0.1331900063373723 | 0.0905399972845800 | F | F | F |
| 0.0323388966921954 | 0.4116080823183026 | 0.2785567217958302 | F | F | F |
| 0.0499999999569383 | 0.6331899898077324 | 0.0905399972845800 | F | F | F |
| 0.7932749963141745 | 0.0461636350781305 | 0.3401423284774125 | F | F | F |
| 0.2815975345470747 | 0.9993033559023488 | 0.3536624792659353 | F | F | F |
| 0.3022645851454939 | 0.5421879014351632 | 0.3472938683601825 | F | F | F |
| 0.7900213721908216 | 0.4973285559750380 | 0.3672514823825850 | F | F | F |
| 0.7609405007434447 | 0.7819620985293056 | 0.3520405495523136 | F | F | F |
| 0.8336300498524380 | 0.5249999785261750 | 0.1796899987074170 | F | F | F |
| 0.2744062998167820 | 0.2666029118207121 | 0.3522170646833658 | F | F | F |
| 0.3336300032074320 | 0.0250000012150693 | 0.1796899987074170 | F | F | F |
| 0.0475353639121181 | 0.8808837242944421 | 0.2584316304838126 | F | F | F |
| 0.0499999999569383 | 0.1668100002848689 | 0.1116700004375772 | F | F | F |
| 0.5476943483896903 | 0.3825685311373164 | 0.2569537006698184 | F | F | F |
| 0.5500000000156575 | 0.6668099508135938 | 0.1116700004375772 | F | F | F |
| 0.5500000000156575 | 0.4000000197871358 | 0.1011099948343812 | F | F | F |
| 0.0478290567517234 | 0.1476868970460785 | 0.2715422071919846 | F | F | F |
| 0.5500000000156575 | 0.8999999537758541 | 0.1011099948343812 | F | F | F |
| 0.0495005916108084 | 0.6460010844220889 | 0.2729472303299332 | F | F | F |
| 0.0499999999569383 | 0.4000000197871358 | 0.1011099948343812 | F | F | F |
| 0.0499999999569383 | 0.8999999537758541 | 0.1011099948343812 | F | F | F |
| 0.5495422310586378 | 0.6507745844759398 | 0.2653720268398132 | F | F | F |
| 0.5514056342344134 | 0.1499096465264955 | 0.2685213710346588 | F | F | F |
| 0.3638859170223157 | 0.5547727209757412 | 0.4924565799199172 | F | F | F |
| 0.4965338926513496 | 0.4391936937159926 | 0.4233128020949550 | F | F | F |
| 0.5499244049328382 | 0.6181260935454844 | 0.4212950332786889 | F | F | F |
| 0.6908991147571442 | 0.5059334904548223 | 0.4829856154208017 | F | F | F |
| 0.6083102166023124 | 0.7290088873356524 | 0.4714279484928809 | T | T | T |
| 0.4641654379743300 | 0.6521951639630289 | 0.5042358529284199 | T | T | T |

pd2pt2 TS1

1.0000000000000000

10.2175998688000007 0.0000000000000000 0.0000000000000000

0.0000000000000000 14.4497995377000006 0.0000000000000000

0.0000000000000000 0.0000000000000000 20.9857006073000001

| O  | In | Pd | Pt | C | H |
|----|----|----|----|---|---|
| 50 | 32 | 2  | 2  | 1 | 1 |

Selective dynamics

Direct

|                    |                    |                    |   |   |   |
|--------------------|--------------------|--------------------|---|---|---|
| 0.1819400070169976 | 0.5179200200151755 | 0.1152000000009252 | F | F | F |
|--------------------|--------------------|--------------------|---|---|---|

|                    |                    |                    |   |   |   |
|--------------------|--------------------|--------------------|---|---|---|
| 0.6819400070463573 | 0.0179200012018939 | 0.1152000000009252 | F | F | F |
| 0.6792494959680866 | 0.0322083097390049 | 0.2518082108922286 | F | F | F |
| 0.1796084945591474 | 0.5182330194678570 | 0.2630290938429596 | F | F | F |
| 0.9138259486675793 | 0.3767687756019029 | 0.3585129246987862 | F | F | F |
| 0.4083171794238467 | 0.8821932402865613 | 0.3579118869817393 | F | F | F |
| 0.4257788003405025 | 0.6727700884498304 | 0.3499152812339617 | F | F | F |
| 0.9152141652039631 | 0.1641770646507226 | 0.3491794135909956 | F | F | F |
| 0.9545099698414390 | 0.3957999998262451 | 0.1866900001816276 | F | F | F |
| 0.4545100162030877 | 0.8957999668260399 | 0.1866900001816276 | F | F | F |
| 0.6429289788306249 | 0.7852956340658963 | 0.2654087044705307 | F | F | F |
| 0.1435033341477734 | 0.2865175279853744 | 0.2722493636550425 | F | F | F |
| 0.4545100162030877 | 0.1542000069701785 | 0.1726800108877526 | F | F | F |
| 0.9545099698414390 | 0.6542000232107696 | 0.1726800108877526 | F | F | F |
| 0.1454900069787115 | 0.7638599677414035 | 0.1037499961175854 | F | F | F |
| 0.6454899838125741 | 0.2638599840062099 | 0.1037499961175854 | F | F | F |
| 0.1903399941604107 | 0.2862900058149904 | 0.1125700078034555 | F | F | F |
| 0.6903399591220492 | 0.7862899728147710 | 0.1125700078034555 | F | F | F |
| 0.9096599471898728 | 0.8817800338738593 | 0.1725899977654990 | F | F | F |
| 0.4096599940025882 | 0.3817800008632233 | 0.1725899977654990 | F | F | F |
| 0.4096599940025882 | 0.6682199561975537 | 0.1867800021095292 | F | F | F |
| 0.9096599471898728 | 0.1682200059331933 | 0.1867800021095292 | F | F | F |
| 0.6892491121112556 | 0.2672669487234529 | 0.2534077760961537 | F | F | F |
| 0.1865840364612694 | 0.7608985061502906 | 0.2535882872568607 | F | F | F |
| 0.4180599929692974 | 0.7820899852182563 | 0.0870100031954095 | F | F | F |
| 0.9180600397917971 | 0.2820900182184687 | 0.0870100031954095 | F | F | F |
| 0.9171316996332166 | 0.7649393519151815 | 0.2874828371356983 | F | F | F |
| 0.4179921239401594 | 0.2667685975803948 | 0.2815745433059007 | F | F | F |
| 0.6819400070463573 | 0.4224300249669426 | 0.1752299989658965 | F | F | F |
| 0.1819400070169976 | 0.9224299589613025 | 0.1752299989658965 | F | F | F |
| 0.1819400070169976 | 0.1275800051637148 | 0.1841400009091316 | F | F | F |
| 0.6819400070463573 | 0.6275799970165963 | 0.1841400009091316 | F | F | F |
| 0.6357774438545931 | 0.3908405918994404 | 0.3526798062312437 | F | F | F |
| 0.1365359798522974 | 0.8964886009411899 | 0.3518622892963208 | F | F | F |
| 0.9572987663313626 | 0.0119211780823392 | 0.2704056664483403 | F | F | F |
| 0.4556627067620695 | 0.5148549992418552 | 0.2718495547612534 | F | F | F |
| 0.1551800274597568 | 0.6487192732919027 | 0.3650002055571946 | F | F | F |
| 0.6416171211067621 | 0.1514800718968630 | 0.3629655666168929 | F | F | F |
| 0.4545100162030877 | 0.5361400390455131 | 0.0984700049111495 | F | F | F |
| 0.9545099698414390 | 0.0361399979172035 | 0.0984700049111495 | F | F | F |
| 0.4096599940025882 | 0.0137099999771024 | 0.0896599968929479 | F | F | F |
| 0.9096599471898728 | 0.5137100339721385 | 0.0896599968929479 | F | F | F |
| 0.7093010976468719 | 0.9198690250531243 | 0.3603549709463181 | F | F | F |
| 0.3065105935431021 | 0.3994224820932502 | 0.3908023775253824 | F | F | F |
| 0.2020367986793090 | 0.1326501464667231 | 0.3569688344669686 | F | F | F |

|                    |                    |                    |   |   |   |
|--------------------|--------------------|--------------------|---|---|---|
| 0.6933656278161706 | 0.6359870805644761 | 0.3501448408393273 | F | F | F |
| 0.8998689349253723 | 0.5369213668831350 | 0.2829016276169298 | F | F | F |
| 0.4068651059864834 | 0.0381464243597733 | 0.2782175403611831 | F | F | F |
| 0.7062062201707349 | 0.7729775946829207 | 0.4568123367174906 | T | T | T |
| 0.5331386967898339 | 0.7337715776282963 | 0.5199572298014417 | T | T | T |
| 0.7999999999980432 | 0.7581899817788198 | 0.1902599908171680 | F | F | F |
| 0.3000000231641877 | 0.7918100087579916 | 0.1691199952197238 | F | F | F |
| 0.3000000231641877 | 0.2581899980436262 | 0.1902599908171680 | F | F | F |
| 0.7999999999980432 | 0.2918100087873938 | 0.1691199952197238 | F | F | F |
| 0.8336300499262208 | 0.0250000011075358 | 0.1796899988537035 | F | F | F |
| 0.7689622166189451 | 0.2676789458402880 | 0.3499278281277682 | F | F | F |
| 0.3336300031037212 | 0.5249999787630841 | 0.1796899988537035 | F | F | F |
| 0.2645202581487212 | 0.7749548595775053 | 0.3505833668048766 | F | F | F |
| 0.5478532046092113 | 0.9175020399258926 | 0.2815491365946770 | F | F | F |
| 0.5500000000078273 | 0.1331900061686895 | 0.0905399971422867 | F | F | F |
| 0.0331071571423749 | 0.4120172559078554 | 0.2784414776720396 | F | F | F |
| 0.0499999999784677 | 0.6331899899038689 | 0.0905399971422867 | F | F | F |
| 0.7930106668209547 | 0.0466244415044912 | 0.3401431830788297 | F | F | F |
| 0.2813446765079775 | 0.9996297656682458 | 0.3534713200001676 | F | F | F |
| 0.3011729241331338 | 0.5409293908169772 | 0.3479735666711079 | F | F | F |
| 0.7906702916689525 | 0.4968076848681449 | 0.3674021142450954 | F | F | F |
| 0.7606007904235312 | 0.7817501695280669 | 0.3519453381895303 | F | F | F |
| 0.8336300499262208 | 0.5249999787630841 | 0.1796899988537035 | F | F | F |
| 0.2729726122220129 | 0.2681858899498124 | 0.3521014390396644 | F | F | F |
| 0.3336300031037212 | 0.0250000011075358 | 0.1796899988537035 | F | F | F |
| 0.0473472205157037 | 0.8808596615536715 | 0.2585479361369636 | F | F | F |
| 0.0499999999784677 | 0.1668100001424335 | 0.1116700002187869 | F | F | F |
| 0.5482685640109537 | 0.3829733774164197 | 0.2574204615967446 | F | F | F |
| 0.5500000000078273 | 0.6668099509068028 | 0.1116700002187869 | F | F | F |
| 0.5500000000078273 | 0.4000000198935751 | 0.1011099949171879 | F | F | F |
| 0.0479564341846768 | 0.1478502881090904 | 0.2714678460261837 | F | F | F |
| 0.5500000000078273 | 0.8999999538879351 | 0.1011099949171879 | F | F | F |
| 0.0493019820611522 | 0.6459903187037810 | 0.2732096260700132 | F | F | F |
| 0.0499999999784677 | 0.4000000198935751 | 0.1011099949171879 | F | F | F |
| 0.0499999999784677 | 0.8999999538879351 | 0.1011099949171879 | F | F | F |
| 0.5495461053671846 | 0.6505382093929200 | 0.2653345716143392 | F | F | F |
| 0.5511254598543616 | 0.1501276915916350 | 0.2687875510000453 | F | F | F |
| 0.3613102660802596 | 0.5558759956322206 | 0.4898920242647549 | F | F | F |
| 0.4973456743286988 | 0.4358106464076172 | 0.4242981701625155 | F | F | F |
| 0.5493863213467876 | 0.6165008878343841 | 0.4199743031309993 | F | F | F |
| 0.6914307978147463 | 0.5072558210686822 | 0.4831357758786083 | F | F | F |
| 0.6071901529925725 | 0.7263590119105601 | 0.4715382058132676 | T | T | T |
| 0.4586522925621566 | 0.6517857097744512 | 0.5047198120621301 | T | T | T |

pd3pt TS1

1.0000000000000000

10.2175998688000007 0.0000000000000000 0.0000000000000000

0.0000000000000000 14.4497995377000006 0.0000000000000000

0.0000000000000000 0.0000000000000000 20.9857006073000001

O In Pd Pt C H

50 32 3 1 1 1

Selective dynamics

Direct

|                    |                    |                    |   |   |   |
|--------------------|--------------------|--------------------|---|---|---|
| 0.1819400070339938 | 0.5179200200303384 | 0.1152000000018631 | F | F | F |
| 0.6819400070927131 | 0.0179200014037875 | 0.1152000000018631 | F | F | F |
| 0.6793226838283104 | 0.0314989645363539 | 0.2521820629655664 | F | F | F |
| 0.1798827561397616 | 0.5182684975247653 | 0.2630542321848779 | F | F | F |
| 0.9126452132429677 | 0.3775570014703220 | 0.3585282280168016 | F | F | F |
| 0.4085856258336307 | 0.8827376282138175 | 0.3582994036998883 | F | F | F |
| 0.4228308745903817 | 0.6732540768798998 | 0.3485631417940382 | F | F | F |
| 0.9149351096408864 | 0.1642322694969423 | 0.3492116548380864 | F | F | F |
| 0.9545099696828743 | 0.395799996524819  | 0.1866900003632566 | F | F | F |
| 0.4545100164061751 | 0.8957999666520422 | 0.1866900003632566 | F | F | F |
| 0.6426909175262097 | 0.7857964322848119 | 0.2650348888403755 | F | F | F |
| 0.1432081392621640 | 0.2867232286260588 | 0.2724576457482115 | F | F | F |
| 0.4545100164061751 | 0.1542000069403500 | 0.1726800107755011 | F | F | F |
| 0.9545099696828743 | 0.6542000234215450 | 0.1726800107755011 | F | F | F |
| 0.1454900069574379 | 0.7638599674827873 | 0.1037499962351802 | F | F | F |
| 0.6454899836251471 | 0.2638599840124058 | 0.1037499962351802 | F | F | F |
| 0.1903399943208370 | 0.2862900056299651 | 0.1125700076069052 | F | F | F |
| 0.6903399592441062 | 0.7862899726295254 | 0.1125700076069052 | F | F | F |
| 0.9096599473797582 | 0.8817800337476811 | 0.1725899975309915 | F | F | F |
| 0.4096599940051888 | 0.3817800007264438 | 0.1725899975309915 | F | F | F |
| 0.4096599940051888 | 0.6682199563951130 | 0.1867800022190593 | F | F | F |
| 0.9096599473797582 | 0.1682200058663881 | 0.1867800022190593 | F | F | F |
| 0.6891034925539543 | 0.2669479048453383 | 0.2533088844473212 | F | F | F |
| 0.1861830881624584 | 0.7610319305587367 | 0.2533245343752881 | F | F | F |
| 0.4180599929386020 | 0.7820899854365138 | 0.0870100033908230 | F | F | F |
| 0.9180600395836080 | 0.2820900184369464 | 0.0870100033908230 | F | F | F |
| 0.9175116303118784 | 0.7652723061391882 | 0.2869472450788280 | F | F | F |
| 0.4178445780126978 | 0.2664984822926471 | 0.2814929127287300 | F | F | F |
| 0.6819400070927131 | 0.4224300249338739 | 0.1752299989317905 | F | F | F |
| 0.1819400070339938 | 0.9224299589225922 | 0.1752299989317905 | F | F | F |
| 0.1819400070339938 | 0.1275800053274239 | 0.1841400008182603 | F | F | F |
| 0.6819400070927131 | 0.6275799970331946 | 0.1841400008182603 | F | F | F |
| 0.6353633208852401 | 0.3909946231128529 | 0.3523380860892900 | F | F | F |
| 0.1369232456318201 | 0.8965663279940372 | 0.3517177146327555 | F | F | F |

|                    |                    |                    |   |   |   |
|--------------------|--------------------|--------------------|---|---|---|
| 0.9573238020918708 | 0.0120383808231992 | 0.2704444120075351 | F | F | F |
| 0.4560704434781258 | 0.5146765573500431 | 0.2714946824008351 | F | F | F |
| 0.1532811212321405 | 0.6487237291766661 | 0.3651805606899785 | F | F | F |
| 0.6419215070061668 | 0.1512161915187988 | 0.3629892427264778 | F | F | F |
| 0.4545100164061751 | 0.5361400390910305 | 0.0984700048222891 | F | F | F |
| 0.9545099696828743 | 0.0361399978344039 | 0.0984700048222891 | F | F | F |
| 0.4096599940051888 | 0.0137099999541945 | 0.0896599967858833 | F | F | F |
| 0.9096599473797582 | 0.5137100339442853 | 0.0896599967858833 | F | F | F |
| 0.7104115361064842 | 0.9188365328532129 | 0.3614004782209577 | F | F | F |
| 0.3061719319720453 | 0.3998606560552957 | 0.3905988694604403 | F | F | F |
| 0.2022373457394337 | 0.1329274736775687 | 0.3570645976026228 | F | F | F |
| 0.6957702739802158 | 0.6370627453010300 | 0.3492424316935754 | F | F | F |
| 0.9000328461133975 | 0.5367667967839722 | 0.2826376764972593 | F | F | F |
| 0.4067526316534966 | 0.0381853911064383 | 0.2781465170026678 | F | F | F |
| 0.7081750852079836 | 0.7696123859190607 | 0.4593352007755414 | T | T | T |
| 0.5374252935880648 | 0.7257365504994482 | 0.5232300427280521 | T | T | T |
| 0.799999999960821  | 0.7581899815576350 | 0.1902599906343454 | F | F | F |
| 0.3000000233283728 | 0.7918100085159736 | 0.1691199954394378 | F | F | F |
| 0.3000000233283728 | 0.2581899980872535 | 0.1902599906343454 | F | F | F |
| 0.799999999960821  | 0.2918100085747710 | 0.1691199954394378 | F | F | F |
| 0.8336300498524380 | 0.0250000012150693 | 0.1796899987074170 | F | F | F |
| 0.7688263364584245 | 0.2680175105860272 | 0.3498982437407818 | F | F | F |
| 0.3336300032074320 | 0.5249999785261750 | 0.1796899987074170 | F | F | F |
| 0.2646046914096019 | 0.7747483808625262 | 0.3502214072068526 | F | F | F |
| 0.5474494202350613 | 0.9173036878913479 | 0.2817188881929980 | F | F | F |
| 0.5500000000156575 | 0.1331900063373723 | 0.0905399972845800 | F | F | F |
| 0.0328222615215878 | 0.4123816234511040 | 0.2786418702877285 | F | F | F |
| 0.0499999999569383 | 0.6331899898077324 | 0.0905399972845800 | F | F | F |
| 0.7932182045427183 | 0.0461608439930430 | 0.3403695098654467 | F | F | F |
| 0.2814524352516159 | 0.9998367675724040 | 0.3535512175426803 | F | F | F |
| 0.3018298419573711 | 0.5421476136447723 | 0.3478994233808450 | F | F | F |
| 0.7891960021937194 | 0.4981527382477822 | 0.3674059126987785 | F | F | F |
| 0.7608585479507894 | 0.7810275170690986 | 0.3512857395974436 | F | F | F |
| 0.8336300498524380 | 0.5249999785261750 | 0.1796899987074170 | F | F | F |
| 0.2732230143519701 | 0.2685144312829308 | 0.3522023773164591 | F | F | F |
| 0.3336300032074320 | 0.0250000012150693 | 0.1796899987074170 | F | F | F |
| 0.0475570004484140 | 0.8809621364599920 | 0.2584881960159322 | F | F | F |
| 0.0499999999569383 | 0.1668100002848689 | 0.1116700004375772 | F | F | F |
| 0.5480699567992531 | 0.3828128172872240 | 0.2573445781015309 | F | F | F |
| 0.5500000000156575 | 0.6668099508135938 | 0.1116700004375772 | F | F | F |
| 0.5500000000156575 | 0.4000000197871358 | 0.1011099948343812 | F | F | F |
| 0.0477134733167190 | 0.1481542905145616 | 0.2715796398322041 | F | F | F |
| 0.5500000000156575 | 0.8999999537758541 | 0.1011099948343812 | F | F | F |
| 0.0492100786884677 | 0.6459315250551825 | 0.2732568749275757 | F | F | F |

|                    |                    |                    |   |   |   |
|--------------------|--------------------|--------------------|---|---|---|
| 0.049999999569383  | 0.4000000197871358 | 0.1011099948343812 | F | F | F |
| 0.049999999569383  | 0.8999999537758541 | 0.1011099948343812 | F | F | F |
| 0.5494814806051451 | 0.6506297171171340 | 0.2658015400517115 | F | F | F |
| 0.5511917998982838 | 0.1498921000958120 | 0.2689239069800564 | F | F | F |
| 0.3646286548641058 | 0.5551715607551273 | 0.4908531195534707 | F | F | F |
| 0.4968856082226054 | 0.4364599405993488 | 0.4237515441765751 | F | F | F |
| 0.5493520105658334 | 0.6189175709125081 | 0.4192850476833172 | F | F | F |
| 0.6890151741990280 | 0.5076391424448232 | 0.4830156442086206 | F | F | F |
| 0.6112016159570004 | 0.7227374469016610 | 0.4745941765750885 | T | T | T |
| 0.4617484047546227 | 0.6474443524127196 | 0.5094431732641125 | T | T | T |

PD4 TS1

1.000000000000000

|                     |                     |                     |
|---------------------|---------------------|---------------------|
| 10.2175998688000007 | 0.0000000000000000  | 0.0000000000000000  |
| 0.0000000000000000  | 14.4497995377000006 | 0.0000000000000000  |
| 0.0000000000000000  | 0.0000000000000000  | 20.9857006073000001 |

|    |    |    |   |   |
|----|----|----|---|---|
| O  | In | Pd | C | H |
| 50 | 32 | 4  | 1 | 1 |

Selective dynamics

Direct

|                    |                    |                    |   |   |   |
|--------------------|--------------------|--------------------|---|---|---|
| 0.1819400070339938 | 0.5179200200303384 | 0.1152000000018631 | F | F | F |
| 0.6819400070927131 | 0.0179200014037875 | 0.1152000000018631 | F | F | F |
| 0.6795395119927079 | 0.0312698010497172 | 0.2523167868147738 | F | F | F |
| 0.1796824503498513 | 0.5178703413607195 | 0.2626937577842625 | F | F | F |
| 0.9110837475653497 | 0.3781135593084173 | 0.3592187208020619 | F | F | F |
| 0.4086811856454275 | 0.8825554752476918 | 0.3581612666781524 | F | F | F |
| 0.4225282964052468 | 0.6720645460549477 | 0.3486793375466846 | F | F | F |
| 0.9149047489356121 | 0.1640593058308042 | 0.3492447477562237 | F | F | F |
| 0.9545099696828743 | 0.3957999996524890 | 0.1866900003632566 | F | F | F |
| 0.4545100164061751 | 0.8957999666520493 | 0.1866900003632566 | F | F | F |
| 0.6432354298106873 | 0.7859618912843018 | 0.2651487774965275 | F | F | F |
| 0.1425004091007978 | 0.2868641706405128 | 0.2725979158146217 | F | F | F |
| 0.4545100164061751 | 0.1542000069403500 | 0.1726800107755011 | F | F | F |
| 0.9545099696828743 | 0.6542000234215450 | 0.1726800107755011 | F | F | F |
| 0.1454900069574379 | 0.7638599674827873 | 0.1037499962351802 | F | F | F |
| 0.6454899836251471 | 0.2638599840124058 | 0.1037499962351802 | F | F | F |
| 0.1903399943208370 | 0.2862900056299651 | 0.1125700076069052 | F | F | F |
| 0.6903399592441062 | 0.7862899726295254 | 0.1125700076069052 | F | F | F |
| 0.9096599473797582 | 0.8817800337476882 | 0.1725899975309915 | F | F | F |
| 0.4096599940051888 | 0.3817800007264509 | 0.1725899975309915 | F | F | F |
| 0.4096599940051888 | 0.6682199563951130 | 0.1867800022190593 | F | F | F |
| 0.9096599473797582 | 0.1682200058663881 | 0.1867800022190593 | F | F | F |
| 0.6890467711653443 | 0.2665540532704114 | 0.2532249042751360 | F | F | F |

|                    |                    |                    |   |   |   |
|--------------------|--------------------|--------------------|---|---|---|
| 0.1861574618738828 | 0.7608053517858338 | 0.2532109680395607 | F | F | F |
| 0.4180599929386020 | 0.7820899854365138 | 0.0870100033908230 | F | F | F |
| 0.9180600395836080 | 0.2820900184369464 | 0.0870100033908230 | F | F | F |
| 0.9179744599270947 | 0.7651413360018609 | 0.2868161963419524 | F | F | F |
| 0.4174858897127720 | 0.2662661961089867 | 0.2814289151515013 | F | F | F |
| 0.6819400070927131 | 0.4224300249338810 | 0.1752299989317905 | F | F | F |
| 0.1819400070339938 | 0.9224299589225993 | 0.1752299989317905 | F | F | F |
| 0.1819400070339938 | 0.1275800053274239 | 0.1841400008182603 | F | F | F |
| 0.6819400070927131 | 0.6275799970331946 | 0.1841400008182603 | F | F | F |
| 0.6348886570648276 | 0.3905545516179885 | 0.3518144148174827 | F | F | F |
| 0.1374281677738693 | 0.8960533020763251 | 0.3516982590367661 | F | F | F |
| 0.9575116115734374 | 0.0118738666496512 | 0.2705185159518493 | F | F | F |
| 0.4564079697764996 | 0.5143340475327065 | 0.2709128637289595 | F | F | F |
| 0.1540614676539249 | 0.6474583903140214 | 0.3650926333949513 | F | F | F |
| 0.6419278452027655 | 0.1509738631059463 | 0.3630643184035378 | F | F | F |
| 0.4545100164061751 | 0.5361400390910305 | 0.0984700048222891 | F | F | F |
| 0.9545099696828743 | 0.0361399978344039 | 0.0984700048222891 | F | F | F |
| 0.4096599940051888 | 0.0137099999541945 | 0.0896599967858833 | F | F | F |
| 0.9096599473797582 | 0.5137100339442853 | 0.0896599967858833 | F | F | F |
| 0.7101770507768137 | 0.9185382402867006 | 0.3619170424522551 | F | F | F |
| 0.3056355905596533 | 0.4008464588978029 | 0.3906028821684941 | F | F | F |
| 0.2028848375622516 | 0.1331486130778856 | 0.3568902583219185 | F | F | F |
| 0.6960820998004991 | 0.6369361069982631 | 0.3477443604964563 | F | F | F |
| 0.8996999771119931 | 0.5364176256795474 | 0.2825171066942715 | F | F | F |
| 0.4067945138110787 | 0.0380427277943198 | 0.2780942080112396 | F | F | F |
| 0.7340928442328334 | 0.7603167055949811 | 0.4593637662434134 | T | T | T |
| 0.5825289784619585 | 0.7113955618957419 | 0.5318068185734077 | T | T | T |
| 0.7999999999960821 | 0.7581899815576350 | 0.1902599906343454 | F | F | F |
| 0.3000000233283728 | 0.7918100085159736 | 0.1691199954394378 | F | F | F |
| 0.3000000233283728 | 0.2581899980872535 | 0.1902599906343454 | F | F | F |
| 0.7999999999960821 | 0.2918100085747710 | 0.1691199954394378 | F | F | F |
| 0.8336300498524380 | 0.0250000012150693 | 0.1796899987074170 | F | F | F |
| 0.7686286646403815 | 0.2677234639233603 | 0.3499487626401674 | F | F | F |
| 0.3336300032074320 | 0.5249999785261750 | 0.1796899987074170 | F | F | F |
| 0.2654253165352856 | 0.7738069681191178 | 0.3500485312448163 | F | F | F |
| 0.5476292606122541 | 0.9170874555735509 | 0.2818288132770235 | F | F | F |
| 0.5500000000156575 | 0.1331900063373723 | 0.0905399972845800 | F | F | F |
| 0.0319446296211296 | 0.4124557860933891 | 0.2791020743397112 | F | F | F |
| 0.0499999999569383 | 0.6331899898077324 | 0.0905399972845800 | F | F | F |
| 0.7932885975596022 | 0.0457551214965832 | 0.3405691330754124 | F | F | F |
| 0.2814569384244550 | 0.9996192507273705 | 0.3535090024163026 | F | F | F |
| 0.3031384187694854 | 0.5415283779196045 | 0.3473037816316307 | F | F | F |
| 0.7858481556742589 | 0.4984822336104600 | 0.3669576809091311 | F | F | F |
| 0.7622211889254586 | 0.7808670226661221 | 0.3515666109883568 | F | F | F |

|                    |                    |                    |   |   |   |
|--------------------|--------------------|--------------------|---|---|---|
| 0.8336300498524380 | 0.5249999785261750 | 0.1796899987074170 | F | F | F |
| 0.2729622726891492 | 0.2693596968887846 | 0.3522311934512814 | F | F | F |
| 0.3336300032074320 | 0.0250000012150693 | 0.1796899987074170 | F | F | F |
| 0.0477754419436707 | 0.8807011429554734 | 0.2586032543206542 | F | F | F |
| 0.049999999569383  | 0.1668100002848689 | 0.1116700004375772 | F | F | F |
| 0.5478448395279045 | 0.3823535047076163 | 0.2570966570369038 | F | F | F |
| 0.5500000000156575 | 0.6668099508135938 | 0.1116700004375772 | F | F | F |
| 0.5500000000156575 | 0.4000000197871429 | 0.1011099948343812 | F | F | F |
| 0.0480675609118251 | 0.1479302050901623 | 0.2717421841394341 | F | F | F |
| 0.5500000000156575 | 0.8999999537758612 | 0.1011099948343812 | F | F | F |
| 0.0493426524584635 | 0.6455877730908242 | 0.2734757698352226 | F | F | F |
| 0.049999999569383  | 0.4000000197871429 | 0.1011099948343812 | F | F | F |
| 0.049999999569383  | 0.8999999537758612 | 0.1011099948343812 | F | F | F |
| 0.5491428937662661 | 0.6508287734470315 | 0.2658900804490401 | F | F | F |
| 0.5511320157017465 | 0.1496254853330967 | 0.2690139934648812 | F | F | F |
| 0.3859641960132478 | 0.5552491810487226 | 0.4997029592277116 | F | F | F |
| 0.4989113380053354 | 0.4388151042014528 | 0.4232979129347001 | F | F | F |
| 0.6926361354153272 | 0.5064638060183739 | 0.4854072435320447 | F | F | F |
| 0.5553008311368970 | 0.6204541348473214 | 0.4204367283479797 | F | F | F |
| 0.6403758843128244 | 0.7118637773456342 | 0.4781423273547603 | T | T | T |
| 0.4972217040936399 | 0.6367359111562011 | 0.5194800168486423 | T | T | T |

CONTCAR(5) trans-cooh-pt4

1.000000000000000

10.2175998688000007 0.0000000000000000 0.0000000000000000

0.0000000000000000 14.4497995377000006 0.0000000000000000

0.0000000000000000 0.0000000000000000 20.9857006073000001

O In Pt C H

50 32 4 1 1

Selective dynamics

Direct

|                    |                    |                    |   |   |   |
|--------------------|--------------------|--------------------|---|---|---|
| 0.1819400070339938 | 0.5179200200303384 | 0.1152000000018631 | F | F | F |
| 0.6819400070927131 | 0.0179200014037875 | 0.1152000000018631 | F | F | F |
| 0.6800440273306023 | 0.0270020576185104 | 0.2539718256025836 | T | T | T |
| 0.1775681117160062 | 0.5201400447678068 | 0.2629753522472669 | T | T | T |
| 0.9128984158882005 | 0.3764925342302234 | 0.3587597480126874 | T | T | T |
| 0.4078566117130435 | 0.8829183142148409 | 0.3588786813308573 | T | T | T |
| 0.4251164734765993 | 0.6749677139492860 | 0.3492909784966756 | T | T | T |
| 0.9168146031045055 | 0.1621774184579436 | 0.3501143775886320 | T | T | T |
| 0.9545099696828743 | 0.395799996524748  | 0.1866900003632566 | F | F | F |
| 0.4545100164061751 | 0.8957999666520209 | 0.1866900003632566 | F | F | F |
| 0.6412786719547157 | 0.7864667325528032 | 0.2644861453656446 | T | T | T |
| 0.1458501395787835 | 0.2867115705290786 | 0.2743298632292550 | T | T | T |



|                    |                    |                    |   |   |   |
|--------------------|--------------------|--------------------|---|---|---|
| 0.4545100164061751 | 0.1542000069403500 | 0.1726800107755011 | F | F | F |
| 0.9545099696828743 | 0.6542000234215450 | 0.1726800107755011 | F | F | F |
| 0.1454900069574379 | 0.7638599674827660 | 0.1037499962351802 | F | F | F |
| 0.6454899836251471 | 0.2638599840124058 | 0.1037499962351802 | F | F | F |
| 0.1903399943208370 | 0.2862900056299651 | 0.1125700076069052 | F | F | F |
| 0.6903399592441062 | 0.7862899726295041 | 0.1125700076069052 | F | F | F |
| 0.9096599473797582 | 0.8817800337476598 | 0.1725899975309915 | F | F | F |
| 0.4096599940051888 | 0.3817800007264367 | 0.1725899975309915 | F | F | F |
| 0.4096599940051888 | 0.6682199563951130 | 0.1867800022190593 | F | F | F |
| 0.9096599473797582 | 0.1682200058663881 | 0.1867800022190593 | F | F | F |
| 0.6900528415833449 | 0.2680750552274631 | 0.2540685141991830 | T | T | T |
| 0.1874464652505097 | 0.7614546802391331 | 0.2535559965993812 | T | T | T |
| 0.4180599929386020 | 0.7820899854364924 | 0.0870100033908230 | F | F | F |
| 0.9180600395836080 | 0.2820900184369464 | 0.0870100033908230 | F | F | F |
| 0.9173220399919657 | 0.7652813624758465 | 0.2852132157510923 | T | T | T |
| 0.4202110205231264 | 0.2635849205369851 | 0.2804451845081175 | T | T | T |
| 0.6819400070927131 | 0.4224300249338668 | 0.1752299989317905 | F | F | F |
| 0.1819400070339938 | 0.9224299589225708 | 0.1752299989317905 | F | F | F |
| 0.1819400070339938 | 0.1275800053274239 | 0.1841400008182603 | F | F | F |
| 0.6819400070927131 | 0.6275799970331946 | 0.1841400008182603 | F | F | F |
| 0.6353266745331183 | 0.3894971387486805 | 0.3547788878194353 | T | T | T |
| 0.1351104205086244 | 0.8963735457745443 | 0.3519534055478672 | T | T | T |
| 0.9565084860625319 | 0.0113823278926120 | 0.2705024667229949 | T | T | T |
| 0.4566301128301831 | 0.5158528673856750 | 0.2713784945323496 | T | T | T |
| 0.1501504842503536 | 0.6522672755027230 | 0.3649645321825687 | T | T | T |
| 0.6446624004243944 | 0.1489328665753860 | 0.3622869317214068 | T | T | T |
| 0.4545100164061751 | 0.5361400390910305 | 0.0984700048222891 | F | F | F |
| 0.9545099696828743 | 0.0361399978344039 | 0.0984700048222891 | F | F | F |
| 0.4096599940051888 | 0.0137099999541945 | 0.0896599967858833 | F | F | F |
| 0.9096599473797582 | 0.5137100339442853 | 0.0896599967858833 | F | F | F |
| 0.7131018643421214 | 0.9162106935155094 | 0.3686406038944128 | T | T | T |
| 0.3218583099288921 | 0.4023732598482752 | 0.3762228669062608 | T | T | T |
| 0.1982474823085951 | 0.1299110342138334 | 0.3539674165011704 | T | T | T |
| 0.6939049856742656 | 0.6419810976498255 | 0.3551090760851281 | T | T | T |
| 0.8972405644165278 | 0.5371980215494361 | 0.2840845371992273 | T | T | T |
| 0.4071101721025201 | 0.0376521815343267 | 0.2781824057900693 | T | T | T |
| 0.3953342043584342 | 0.2441233649862014 | 0.4474690834570509 | T | T | T |
| 0.5460138720832859 | 0.2874669456172825 | 0.5171214823662211 | T | T | T |
| 0.799999999960821  | 0.7581899815576136 | 0.1902599906343454 | F | F | F |
| 0.3000000233283728 | 0.7918100085159523 | 0.1691199954394378 | F | F | F |
| 0.3000000233283728 | 0.2581899980872535 | 0.1902599906343454 | F | F | F |
| 0.799999999960821  | 0.2918100085747710 | 0.1691199954394378 | F | F | F |
| 0.8336300498524380 | 0.0250000012150693 | 0.1796899987074170 | F | F | F |
| 0.7720287564174839 | 0.2654903267725999 | 0.3496970356068090 | T | T | T |

|                    |                    |                    |   |   |   |
|--------------------|--------------------|--------------------|---|---|---|
| 0.3336300032074320 | 0.5249999785261750 | 0.1796899987074170 | F | F | F |
| 0.2630216500493958 | 0.7759628893627877 | 0.3508766215191486 | T | T | T |
| 0.5431334768423781 | 0.9166477509111317 | 0.2814245443221068 | T | T | T |
| 0.5500000000156575 | 0.1331900063373723 | 0.0905399972845800 | F | F | F |
| 0.0338229454805727 | 0.4115336532651241 | 0.2787296976764608 | T | T | T |
| 0.0499999999569383 | 0.6331899898077324 | 0.0905399972845800 | F | F | F |
| 0.7955132577423498 | 0.0434664116510604 | 0.3414934773220466 | T | T | T |
| 0.2799693928187281 | 0.9995464789774360 | 0.3534674377844169 | T | T | T |
| 0.2962666247139154 | 0.5454349893949697 | 0.3491048799990182 | T | T | T |
| 0.7919506309245818 | 0.4972120441342085 | 0.3697371221594423 | T | T | T |
| 0.7612546987264182 | 0.7825002030938748 | 0.3483206546397568 | T | T | T |
| 0.8336300498524380 | 0.5249999785261750 | 0.1796899987074170 | F | F | F |
| 0.2810971074266959 | 0.2626459720026517 | 0.3538412291844324 | T | T | T |
| 0.3336300032074320 | 0.0250000012150693 | 0.1796899987074170 | F | F | F |
| 0.0488501168709874 | 0.8812598306124357 | 0.2578129319355966 | T | T | T |
| 0.0499999999569383 | 0.1668100002848689 | 0.1116700004375772 | F | F | F |
| 0.5456569515243217 | 0.3826245330230336 | 0.2580689857212235 | T | T | T |
| 0.5500000000156575 | 0.6668099508135938 | 0.1116700004375772 | F | F | F |
| 0.5500000000156575 | 0.4000000197871287 | 0.1011099948343812 | F | F | F |
| 0.0494006617103651 | 0.1477021756661543 | 0.2721019721682154 | T | T | T |
| 0.5500000000156575 | 0.8999999537758328 | 0.1011099948343812 | F | F | F |
| 0.0488053681236167 | 0.6461868678672502 | 0.2723076531417163 | T | T | T |
| 0.0499999999569383 | 0.4000000197871287 | 0.1011099948343812 | F | F | F |
| 0.0499999999569383 | 0.8999999537758328 | 0.1011099948343812 | F | F | F |
| 0.5486339605949411 | 0.6503443791692973 | 0.2653722318384197 | T | T | T |
| 0.5538366690862873 | 0.1485220717345186 | 0.2682737028861553 | T | T | T |
| 0.3595260504724536 | 0.5455978337644609 | 0.4857713820227758 | T | T | T |
| 0.4966981462554756 | 0.4294462271271442 | 0.4270591762332572 | T | T | T |
| 0.6862585164206934 | 0.5090806479465400 | 0.4855123164117359 | T | T | T |
| 0.5403875477507540 | 0.6104590247464543 | 0.4173092376255738 | T | T | T |
| 0.4722408680813714 | 0.3053174590963934 | 0.4654953582230021 | T | T | T |
| 0.5987314643862902 | 0.3438812369185840 | 0.5247811307069696 | T | T | T |

CONTCAR(4) trans-cooh-pdpt3

1.0000000000000000

10.2175998688000007 0.0000000000000000 0.0000000000000000

0.0000000000000000 14.4497995377000006 0.0000000000000000

0.0000000000000000 0.0000000000000000 20.9857006073000001

O In Pd Pt C H  
50 32 1 3 1 1

Selective dynamics

Direct

|                    |                    |                    |   |   |   |
|--------------------|--------------------|--------------------|---|---|---|
| 0.1819400070339938 | 0.5179200200303384 | 0.1152000000018631 | F | F | F |
| 0.6819400070927131 | 0.0179200014037875 | 0.1152000000018631 | F | F | F |
| 0.6793741845017891 | 0.0317885188763398 | 0.2518994003621984 | T | T | T |

|                    |                    |                    |   |   |   |
|--------------------|--------------------|--------------------|---|---|---|
| 0.1786425046348512 | 0.5176235179920354 | 0.2638762891441289 | T | T | T |
| 0.9096343570464001 | 0.3774773492669610 | 0.3591110034151797 | T | T | T |
| 0.4083119485245277 | 0.8814833653094425 | 0.3583395222108905 | T | T | T |
| 0.4248070954004746 | 0.6723696425552745 | 0.3519458592158600 | T | T | T |
| 0.9149732169665086 | 0.1636012599228351 | 0.3495961884914678 | T | T | T |
| 0.9545099696828743 | 0.3957999996524748 | 0.1866900003632566 | F | F | F |
| 0.4545100164061751 | 0.8957999666520209 | 0.1866900003632566 | F | F | F |
| 0.6414345421324015 | 0.7845968079451850 | 0.2653187086177908 | T | T | T |
| 0.1429541102879668 | 0.2861131377838717 | 0.2733745089477324 | T | T | T |
| 0.4545100164061751 | 0.1542000069403500 | 0.1726800107755011 | F | F | F |
| 0.9545099696828743 | 0.6542000234215450 | 0.1726800107755011 | F | F | F |
| 0.1454900069574379 | 0.7638599674827660 | 0.1037499962351802 | F | F | F |
| 0.6454899836251471 | 0.2638599840124058 | 0.1037499962351802 | F | F | F |
| 0.1903399943208370 | 0.2862900056299651 | 0.1125700076069052 | F | F | F |
| 0.6903399592441062 | 0.7862899726295041 | 0.1125700076069052 | F | F | F |
| 0.9096599473797582 | 0.8817800337476598 | 0.1725899975309915 | F | F | F |
| 0.4096599940051888 | 0.3817800007264367 | 0.1725899975309915 | F | F | F |
| 0.4096599940051888 | 0.6682199563951130 | 0.1867800022190593 | F | F | F |
| 0.9096599473797582 | 0.1682200058663881 | 0.1867800022190593 | F | F | F |
| 0.6899220670981521 | 0.2680805840549141 | 0.2541395462618397 | T | T | T |
| 0.1867514885165136 | 0.7607122190683597 | 0.2534943919849013 | T | T | T |
| 0.4180599929386020 | 0.7820899854364924 | 0.0870100033908230 | F | F | F |
| 0.9180600395836080 | 0.2820900184369464 | 0.0870100033908230 | F | F | F |
| 0.9172120854921957 | 0.7650012571684996 | 0.2866908474282468 | T | T | T |
| 0.4186012469964169 | 0.2657176309213085 | 0.2808650283673728 | T | T | T |
| 0.6819400070927131 | 0.4224300249338668 | 0.1752299989317905 | F | F | F |
| 0.1819400070339938 | 0.9224299589225708 | 0.1752299989317905 | F | F | F |
| 0.1819400070339938 | 0.1275800053274239 | 0.1841400008182603 | F | F | F |
| 0.6819400070927131 | 0.6275799970331946 | 0.1841400008182603 | F | F | F |
| 0.6319728328618410 | 0.3900357996522388 | 0.3537069059978251 | T | T | T |
| 0.1358622696798975 | 0.8960791468025491 | 0.3518824937203036 | T | T | T |
| 0.9569216475051476 | 0.0117785150291922 | 0.2705008637690085 | T | T | T |
| 0.4545890871115219 | 0.5148035528098731 | 0.2716888365870673 | T | T | T |
| 0.1520580292269145 | 0.6498121292187236 | 0.3649236382101719 | T | T | T |
| 0.6410119397708414 | 0.1506854472213774 | 0.3630601277912930 | T | T | T |
| 0.4545100164061751 | 0.5361400390910305 | 0.0984700048222891 | F | F | F |
| 0.9545099696828743 | 0.0361399978344039 | 0.0984700048222891 | F | F | F |
| 0.4096599940051888 | 0.0137099999541945 | 0.0896599967858833 | F | F | F |
| 0.9096599473797582 | 0.5137100339442853 | 0.0896599967858833 | F | F | F |
| 0.7092258236052942 | 0.9187964235980814 | 0.3601143927532746 | T | T | T |
| 0.3105872521888742 | 0.3962115148213599 | 0.3891349060764426 | T | T | T |
| 0.2006432765104194 | 0.1308259613769565 | 0.3575362917218854 | T | T | T |
| 0.6933585349101321 | 0.6356176849677055 | 0.3507053680965768 | T | T | T |
| 0.8991551814623975 | 0.5365422517322358 | 0.2828871264654467 | T | T | T |

|                    |                    |                    |   |   |   |
|--------------------|--------------------|--------------------|---|---|---|
| 0.4069101293757100 | 0.0378825807250038 | 0.2784406567045821 | T | T | T |
| 0.7091695622341376 | 0.7736095110759322 | 0.4557473550336653 | T | T | T |
| 0.5455330717573972 | 0.7538730501591360 | 0.5235756163214731 | T | T | T |
| 0.7999999999960821 | 0.7581899815576136 | 0.1902599906343454 | F | F | F |
| 0.3000000233283728 | 0.7918100085159523 | 0.1691199954394378 | F | F | F |
| 0.3000000233283728 | 0.2581899980872535 | 0.1902599906343454 | F | F | F |
| 0.7999999999960821 | 0.2918100085747710 | 0.1691199954394378 | F | F | F |
| 0.8336300498524380 | 0.0250000012150693 | 0.1796899987074170 | F | F | F |
| 0.7684147085996003 | 0.2666052004776205 | 0.3507475174449937 | T | T | T |
| 0.3336300032074320 | 0.5249999785261750 | 0.1796899987074170 | F | F | F |
| 0.2636159063900863 | 0.7747405471153570 | 0.3504084970215757 | T | T | T |
| 0.5474128944503178 | 0.9171096724764212 | 0.2814979702145308 | T | T | T |
| 0.5500000000156575 | 0.1331900063373723 | 0.0905399972845800 | F | F | F |
| 0.0313530077515054 | 0.4113217950709398 | 0.2789914444285131 | T | T | T |
| 0.0499999999569383 | 0.6331899898077324 | 0.0905399972845800 | F | F | F |
| 0.7930762345938618 | 0.0457478295711979 | 0.3402943530938956 | T | T | T |
| 0.2813694565288927 | 0.9985990500236923 | 0.3535962635505285 | T | T | T |
| 0.2987350872994625 | 0.5421918944932642 | 0.3486701808677566 | T | T | T |
| 0.7885137883790705 | 0.4986268743938851 | 0.3674879400896103 | T | T | T |
| 0.7608937978226891 | 0.7806534929840012 | 0.3507119644567069 | T | T | T |
| 0.8336300498524380 | 0.5249999785261750 | 0.1796899987074170 | F | F | F |
| 0.2753843498570987 | 0.2643326626906202 | 0.3517729867783288 | T | T | T |
| 0.3336300032074320 | 0.0250000012150693 | 0.1796899987074170 | F | F | F |
| 0.0476880787689353 | 0.8809455425183046 | 0.2582305073497295 | T | T | T |
| 0.0499999999569383 | 0.1668100002848689 | 0.1116700004375772 | F | F | F |
| 0.5474448843853850 | 0.3827615935732425 | 0.2569267296650324 | T | T | T |
| 0.5500000000156575 | 0.6668099508135938 | 0.1116700004375772 | F | F | F |
| 0.5500000000156575 | 0.4000000197871287 | 0.1011099948343812 | F | F | F |
| 0.0471477410023553 | 0.1476693970725762 | 0.2713667032593534 | T | T | T |
| 0.5500000000156575 | 0.8999999537758328 | 0.1011099948343812 | F | F | F |
| 0.0488683845396096 | 0.6458213519815814 | 0.2725963104780789 | T | T | T |
| 0.0499999999569383 | 0.4000000197871287 | 0.1011099948343812 | F | F | F |
| 0.0499999999569383 | 0.8999999537758328 | 0.1011099948343812 | F | F | F |
| 0.5495884214216105 | 0.6494233356731058 | 0.2661721518646303 | T | T | T |
| 0.5520837562088516 | 0.1496093420518321 | 0.2682802511681359 | T | T | T |
| 0.3521580763884344 | 0.5489967511935561 | 0.4862025486429715 | T | T | T |
| 0.4948261642309788 | 0.4392903465675886 | 0.4216917250004641 | T | T | T |
| 0.5446984282302481 | 0.6190913762891981 | 0.4247700965208168 | T | T | T |
| 0.6863418681195199 | 0.5054946364402895 | 0.4839539243761593 | T | T | T |
| 0.6088255128982780 | 0.7292884188653801 | 0.4700557297037022 | T | T | T |
| 0.4744186284317990 | 0.7081756374474324 | 0.5288658385674054 | T | T | T |

1.0000000000000000  
 10.2175998688000007 0.0000000000000000 0.0000000000000000  
 0.0000000000000000 14.4497995377000006 0.0000000000000000  
 0.0000000000000000 0.0000000000000000 20.9857006073000001

O In Pd Pt C H  
 50 32 2 2 1 1

Selective dynamics

Direct

|                    |                    |                    |   |   |   |
|--------------------|--------------------|--------------------|---|---|---|
| 0.1819400070339938 | 0.5179200200303384 | 0.115200000018631  | F | F | F |
| 0.6819400070927131 | 0.0179200014037875 | 0.115200000018631  | F | F | F |
| 0.6790485345003177 | 0.0318859679049481 | 0.2519299029751565 | T | T | T |
| 0.1791627679881955 | 0.5182828073891059 | 0.2635191790479610 | T | T | T |
| 0.9127792588380572 | 0.3778432053848277 | 0.3591591875447051 | T | T | T |
| 0.4078885911255199 | 0.8818087832719002 | 0.3582530389293126 | T | T | T |
| 0.4251918499207292 | 0.6720493447800635 | 0.3515098312610405 | T | T | T |
| 0.9149303241430147 | 0.1642268891329408 | 0.3492192813433093 | T | T | T |
| 0.9545099696828743 | 0.3957999996524748 | 0.1866900003632566 | F | F | F |
| 0.4545100164061751 | 0.8957999666520209 | 0.1866900003632566 | F | F | F |
| 0.6412570690643591 | 0.7847346559817296 | 0.2651812236235003 | T | T | T |
| 0.1426102262870117 | 0.2863552355483279 | 0.2722210095565103 | T | T | T |
| 0.4545100164061751 | 0.1542000069403500 | 0.1726800107755011 | F | F | F |
| 0.9545099696828743 | 0.6542000234215450 | 0.1726800107755011 | F | F | F |
| 0.1454900069574379 | 0.7638599674827660 | 0.1037499962351802 | F | F | F |
| 0.6454899836251471 | 0.2638599840124058 | 0.1037499962351802 | F | F | F |
| 0.1903399943208370 | 0.2862900056299651 | 0.1125700076069052 | F | F | F |
| 0.6903399592441062 | 0.7862899726295041 | 0.1125700076069052 | F | F | F |
| 0.9096599473797582 | 0.8817800337476598 | 0.1725899975309915 | F | F | F |
| 0.4096599940051888 | 0.3817800007264367 | 0.1725899975309915 | F | F | F |
| 0.4096599940051888 | 0.6682199563951130 | 0.1867800022190593 | F | F | F |
| 0.9096599473797582 | 0.1682200058663881 | 0.1867800022190593 | F | F | F |
| 0.6892350248293297 | 0.2672568515560414 | 0.2534904846549964 | T | T | T |
| 0.1868095740990157 | 0.7609867399481800 | 0.2534840549179407 | T | T | T |
| 0.4180599929386020 | 0.7820899854364924 | 0.0870100033908230 | F | F | F |
| 0.9180600395836080 | 0.2820900184369464 | 0.0870100033908230 | F | F | F |
| 0.9172045817789893 | 0.7651506479186807 | 0.2866558352956545 | T | T | T |
| 0.4177488523637436 | 0.2662049075372579 | 0.2813264462330380 | T | T | T |
| 0.6819400070927131 | 0.4224300249338668 | 0.1752299989317905 | F | F | F |
| 0.1819400070339938 | 0.9224299589225708 | 0.1752299989317905 | F | F | F |
| 0.1819400070339938 | 0.1275800053274239 | 0.1841400008182603 | F | F | F |
| 0.6819400070927131 | 0.6275799970331946 | 0.1841400008182603 | F | F | F |
| 0.6361254940871248 | 0.3914748466628382 | 0.3521907232756405 | T | T | T |
| 0.1357374916848073 | 0.8961447832951563 | 0.3519311291899783 | T | T | T |
| 0.9568366233980541 | 0.0118513040506016 | 0.2704965134543755 | T | T | T |
| 0.4545010136174312 | 0.5145765559729654 | 0.2721427318854381 | T | T | T |

|                    |                    |                    |   |   |   |
|--------------------|--------------------|--------------------|---|---|---|
| 0.1524240359410172 | 0.6498708767367347 | 0.3649865680659090 | T | T | T |
| 0.6416119143614836 | 0.1516242442280813 | 0.3630344739546203 | T | T | T |
| 0.4545100164061751 | 0.5361400390910305 | 0.0984700048222891 | F | F | F |
| 0.9545099696828743 | 0.0361399978344039 | 0.0984700048222891 | F | F | F |
| 0.4096599940051888 | 0.0137099999541945 | 0.0896599967858833 | F | F | F |
| 0.9096599473797582 | 0.5137100339442853 | 0.0896599967858833 | F | F | F |
| 0.7092640218136808 | 0.9191201071130379 | 0.3604765955762446 | T | T | T |
| 0.3066721080428607 | 0.3971348720430967 | 0.3899361896292106 | T | T | T |
| 0.2006000916159323 | 0.1316533489978795 | 0.3568446354673824 | T | T | T |
| 0.6940511550931348 | 0.6361326259156357 | 0.3503552755261126 | T | T | T |
| 0.8995950333490441 | 0.5369770892905095 | 0.2827447422570728 | T | T | T |
| 0.4067258105314409 | 0.0378683038987546 | 0.2783959603305917 | T | T | T |
| 0.7099599131135008 | 0.7718487349352188 | 0.4562288139986705 | T | T | T |
| 0.5514250214092584 | 0.7452734049109182 | 0.5261308796330653 | T | T | T |
| 0.799999999960821  | 0.7581899815576136 | 0.1902599906343454 | F | F | F |
| 0.3000000233283728 | 0.7918100085159523 | 0.1691199954394378 | F | F | F |
| 0.3000000233283728 | 0.2581899980872535 | 0.1902599906343454 | F | F | F |
| 0.799999999960821  | 0.2918100085747710 | 0.1691199954394378 | F | F | F |
| 0.8336300498524380 | 0.0250000012150693 | 0.1796899987074170 | F | F | F |
| 0.7691308259909917 | 0.2679249933211523 | 0.3499259761715265 | T | T | T |
| 0.3336300032074320 | 0.5249999785261750 | 0.1796899987074170 | F | F | F |
| 0.2639575352249182 | 0.7746504334303665 | 0.3504345043536432 | T | T | T |
| 0.5472880627965537 | 0.9172600488647404 | 0.2815666052190551 | T | T | T |
| 0.5500000000156575 | 0.1331900063373723 | 0.0905399972845800 | F | F | F |
| 0.0324648997529238 | 0.4120395893631823 | 0.2787070901908280 | T | T | T |
| 0.0499999999569383 | 0.6331899898077324 | 0.0905399972845800 | F | F | F |
| 0.7926713812167847 | 0.0464361786223577 | 0.3401991758016578 | T | T | T |
| 0.2804952409963235 | 0.9990720264346464 | 0.3533617312906188 | T | T | T |
| 0.2978486438344063 | 0.5407401236813740 | 0.3494246734997901 | T | T | T |
| 0.7893695009015715 | 0.4983360471536500 | 0.3674072680996687 | T | T | T |
| 0.7606990705581751 | 0.7811533854352959 | 0.3505422676418704 | T | T | T |
| 0.8336300498524380 | 0.5249999785261750 | 0.1796899987074170 | F | F | F |
| 0.2723054103973297 | 0.2665800456673466 | 0.3517568192473917 | T | T | T |
| 0.3336300032074320 | 0.0250000012150693 | 0.1796899987074170 | F | F | F |
| 0.0475635696377452 | 0.8810380583117308 | 0.2583469953811104 | T | T | T |
| 0.0499999999569383 | 0.1668100002848689 | 0.1116700004375772 | F | F | F |
| 0.5476210197010332 | 0.3827264690755996 | 0.2571851779187284 | T | T | T |
| 0.5500000000156575 | 0.6668099508135938 | 0.1116700004375772 | F | F | F |
| 0.5500000000156575 | 0.4000000197871287 | 0.1011099948343812 | F | F | F |
| 0.0472593848610288 | 0.1478174927770297 | 0.2712666456643333 | T | T | T |
| 0.5500000000156575 | 0.8999999537758328 | 0.1011099948343812 | F | F | F |
| 0.0492517520396447 | 0.6459876705276173 | 0.2727204677904780 | T | T | T |
| 0.0499999999569383 | 0.4000000197871287 | 0.1011099948343812 | F | F | F |
| 0.0499999999569383 | 0.8999999537758328 | 0.1011099948343812 | F | F | F |

|                    |                    |                    |   |   |   |
|--------------------|--------------------|--------------------|---|---|---|
| 0.5497038185833887 | 0.6490132638250472 | 0.2660158120135563 | T | T | T |
| 0.5511865521657668 | 0.1499720961659321 | 0.2687397435417154 | T | T | T |
| 0.3544014841262992 | 0.5488867100698300 | 0.4849129090854518 | T | T | T |
| 0.4964093415271904 | 0.4363905758123749 | 0.4217756002606734 | T | T | T |
| 0.5456200998496712 | 0.6183681448639291 | 0.4235083361638132 | T | T | T |
| 0.6872935916302652 | 0.5064274949141563 | 0.4838682864613730 | T | T | T |
| 0.6122661255729440 | 0.7253591491438129 | 0.4711469495360632 | T | T | T |
| 0.4817897611543316 | 0.6979340561722438 | 0.5307674655850292 | T | T | T |

CONTCAR(2) trans-cooh-pd3pt

1.0000000000000000

10.2175998688000007 0.0000000000000000 0.0000000000000000

0.0000000000000000 14.4497995377000006 0.0000000000000000

0.0000000000000000 0.0000000000000000 20.9857006073000001

| O  | In | Pd | Pt | C | H |
|----|----|----|----|---|---|
| 50 | 32 | 3  | 1  | 1 | 1 |

Selective dynamics

Direct

|                    |                    |                    |   |   |   |
|--------------------|--------------------|--------------------|---|---|---|
| 0.1819400070339938 | 0.5179200200303384 | 0.1152000000018631 | F | F | F |
| 0.6819400070927131 | 0.0179200014037875 | 0.1152000000018631 | F | F | F |
| 0.6793385133490446 | 0.0312777768095458 | 0.2522357731524139 | T | T | T |
| 0.1794188328393034 | 0.5183715402373181 | 0.2636229502622172 | T | T | T |
| 0.9115569093378184 | 0.3784470679302032 | 0.3591838691641627 | T | T | T |
| 0.4083187012512610 | 0.8825293523216970 | 0.3585954795899653 | T | T | T |
| 0.4221685596845575 | 0.6728858223189889 | 0.3499083329658106 | T | T | T |
| 0.9147557853753483 | 0.1640795455847197 | 0.3493226162088874 | T | T | T |
| 0.9545099696828743 | 0.3957999996524748 | 0.1866900003632566 | F | F | F |
| 0.4545100164061751 | 0.8957999666520209 | 0.1866900003632566 | F | F | F |
| 0.6413026657450658 | 0.7853481338683608 | 0.2649095026092567 | T | T | T |
| 0.1425382481146684 | 0.2864457092920034 | 0.2724442022343183 | T | T | T |
| 0.4545100164061751 | 0.1542000069403500 | 0.1726800107755011 | F | F | F |
| 0.9545099696828743 | 0.6542000234215450 | 0.1726800107755011 | F | F | F |
| 0.1454900069574379 | 0.7638599674827660 | 0.1037499962351802 | F | F | F |
| 0.6454899836251471 | 0.2638599840124058 | 0.1037499962351802 | F | F | F |
| 0.1903399943208370 | 0.2862900056299651 | 0.1125700076069052 | F | F | F |
| 0.6903399592441062 | 0.7862899726295041 | 0.1125700076069052 | F | F | F |
| 0.9096599473797582 | 0.8817800337476598 | 0.1725899975309915 | F | F | F |
| 0.4096599940051888 | 0.3817800007264367 | 0.1725899975309915 | F | F | F |
| 0.4096599940051888 | 0.6682199563951130 | 0.1867800022190593 | F | F | F |
| 0.9096599473797582 | 0.1682200058663881 | 0.1867800022190593 | F | F | F |
| 0.6893392486662933 | 0.2670745955615885 | 0.2534573989056241 | T | T | T |
| 0.1860885913921280 | 0.7611260978099850 | 0.2531908449567339 | T | T | T |
| 0.4180599929386020 | 0.7820899854364924 | 0.0870100033908230 | F | F | F |

|                    |                    |                    |   |   |   |
|--------------------|--------------------|--------------------|---|---|---|
| 0.9180600395836080 | 0.2820900184369464 | 0.0870100033908230 | F | F | F |
| 0.9170134063129112 | 0.7655046750285663 | 0.2864569591336661 | T | T | T |
| 0.4178967643158344 | 0.2659861674262416 | 0.2811545804937055 | T | T | T |
| 0.6819400070927131 | 0.4224300249338668 | 0.1752299989317905 | F | F | F |
| 0.1819400070339938 | 0.9224299589225708 | 0.1752299989317905 | F | F | F |
| 0.1819400070339938 | 0.1275800053274239 | 0.1841400008182603 | F | F | F |
| 0.6819400070927131 | 0.6275799970331946 | 0.1841400008182603 | F | F | F |
| 0.6356729584711331 | 0.3912476106402778 | 0.3520175069943932 | T | T | T |
| 0.1364272224282601 | 0.8965048028046141 | 0.3517084425086097 | T | T | T |
| 0.9568584683422685 | 0.0119470829083497 | 0.2704758820939901 | T | T | T |
| 0.4549821142407922 | 0.5144596207026879 | 0.2717435153089056 | T | T | T |
| 0.1504151001757847 | 0.6502293074442633 | 0.3651962982713925 | T | T | T |
| 0.6419043916942186 | 0.1512696648168088 | 0.3630264406029511 | T | T | T |
| 0.4545100164061751 | 0.5361400390910305 | 0.0984700048222891 | F | F | F |
| 0.9545099696828743 | 0.0361399978344039 | 0.0984700048222891 | F | F | F |
| 0.4096599940051888 | 0.0137099999541945 | 0.0896599967858833 | F | F | F |
| 0.9096599473797582 | 0.5137100339442853 | 0.0896599967858833 | F | F | F |
| 0.7103487004012408 | 0.9182605413136500 | 0.3613394273155279 | T | T | T |
| 0.3057419127882142 | 0.3974656556691727 | 0.3899045522631823 | T | T | T |
| 0.2011064567908463 | 0.1320152582090870 | 0.3568715650673795 | T | T | T |
| 0.6961411748853124 | 0.6364857352733821 | 0.3490996908255113 | T | T | T |
| 0.9001267439157061 | 0.5365327503705259 | 0.2823884230046971 | T | T | T |
| 0.4069174454872595 | 0.0380401165079221 | 0.2782120153232199 | T | T | T |
| 0.7069357752347400 | 0.7703562616694910 | 0.4586504445780406 | T | T | T |
| 0.5474885367766120 | 0.7404849377023197 | 0.5281692171526302 | T | T | T |
| 0.799999999960821  | 0.7581899815576136 | 0.1902599906343454 | F | F | F |
| 0.3000000233283728 | 0.7918100085159523 | 0.1691199954394378 | F | F | F |
| 0.3000000233283728 | 0.2581899980872535 | 0.1902599906343454 | F | F | F |
| 0.799999999960821  | 0.2918100085747710 | 0.1691199954394378 | F | F | F |
| 0.8336300498524380 | 0.0250000012150693 | 0.1796899987074170 | F | F | F |
| 0.7690771841589381 | 0.2680748747810071 | 0.3501255761773407 | T | T | T |
| 0.3336300032074320 | 0.5249999785261750 | 0.1796899987074170 | F | F | F |
| 0.2640626864219016 | 0.7746348060967563 | 0.3500737209512224 | T | T | T |
| 0.5470738247832116 | 0.9170915645807085 | 0.2817212241406537 | T | T | T |
| 0.5500000000156575 | 0.1331900063373723 | 0.0905399972845800 | F | F | F |
| 0.0322545058283907 | 0.4122715074681125 | 0.2790390735285015 | T | T | T |
| 0.0499999999569383 | 0.6331899898077324 | 0.0905399972845800 | F | F | F |
| 0.7929489000247543 | 0.0459170884879683 | 0.3404785349440971 | T | T | T |
| 0.2811417661982745 | 0.9994321405872881 | 0.3533693250448806 | T | T | T |
| 0.2987595058446928 | 0.5423967066668069 | 0.3491565604014255 | T | T | T |
| 0.7878388067885069 | 0.4994282305179496 | 0.3671494429088042 | T | T | T |
| 0.7600521072246096 | 0.7801580335683838 | 0.3505739386291111 | T | T | T |
| 0.8336300498524380 | 0.5249999785261750 | 0.1796899987074170 | F | F | F |
| 0.2733070269230069 | 0.2669214965349553 | 0.3518113549171389 | T | T | T |



|                    |                    |                    |   |   |   |
|--------------------|--------------------|--------------------|---|---|---|
| 0.3336300032074320 | 0.0250000012150693 | 0.1796899987074170 | F | F | F |
| 0.0473794765944078 | 0.8809484814142436 | 0.2584206504828046 | T | T | T |
| 0.0499999999569383 | 0.1668100002848689 | 0.1116700004375772 | F | F | F |
| 0.5476449328040331 | 0.3827517470013291 | 0.2571694105378057 | T | T | T |
| 0.5500000000156575 | 0.6668099508135938 | 0.1116700004375772 | F | F | F |
| 0.5500000000156575 | 0.4000000197871287 | 0.1011099948343812 | F | F | F |
| 0.0472078991656772 | 0.1479864555164525 | 0.2714620112116677 | T | T | T |
| 0.5500000000156575 | 0.8999999537758328 | 0.1011099948343812 | F | F | F |
| 0.0487356636076228 | 0.6460356531552307 | 0.2731061618425912 | T | T | T |
| 0.0499999999569383 | 0.4000000197871287 | 0.1011099948343812 | F | F | F |
| 0.0499999999569383 | 0.8999999537758328 | 0.1011099948343812 | F | F | F |
| 0.5496424141370255 | 0.6494233339988966 | 0.2666412322389249 | T | T | T |
| 0.5517416019722106 | 0.1498059856468359 | 0.2687344214962266 | T | T | T |
| 0.3527689246736614 | 0.5476429004726242 | 0.4840369269455707 | T | T | T |
| 0.4955590018046649 | 0.4360276776442760 | 0.4212597028618958 | T | T | T |
| 0.5447053175442775 | 0.6197769612627368 | 0.4229076328230121 | T | T | T |
| 0.6846999420442756 | 0.5063425664420507 | 0.4835523125814802 | T | T | T |
| 0.6107107326240211 | 0.7233155665493243 | 0.4735399828058107 | T | T | T |
| 0.4787802518812470 | 0.6921547511172221 | 0.5314772024446341 | T | T | T |

CONTCAR(3) trans-cooh-pd4

1.0000000000000000

10.2175998688000007 0.0000000000000000 0.0000000000000000

0.0000000000000000 14.4497995377000006 0.0000000000000000

0.0000000000000000 0.0000000000000000 20.9857006073000001

O In Pd C H

50 32 4 1 1

Selective dynamics

Direct

|                    |                    |                    |   |   |   |
|--------------------|--------------------|--------------------|---|---|---|
| 0.1819400070339938 | 0.5179200200303384 | 0.1152000000018631 | F | F | F |
| 0.6819400070927131 | 0.0179200014037875 | 0.1152000000018631 | F | F | F |
| 0.6795257221083659 | 0.0307742060194300 | 0.2525395698127255 | T | T | T |
| 0.1800093995871208 | 0.5182315088619802 | 0.2640019352849308 | T | T | T |
| 0.9110838881392738 | 0.3791820126277869 | 0.3595298204122912 | T | T | T |
| 0.4084612869772570 | 0.8824330841158599 | 0.3584262527655326 | T | T | T |
| 0.4216400560130822 | 0.6724793649043548 | 0.3482734394144842 | T | T | T |
| 0.9149304258512814 | 0.1641102896948681 | 0.3492293881981041 | T | T | T |
| 0.9545099696828743 | 0.3957999996524748 | 0.1866900003632566 | F | F | F |
| 0.4545100164061751 | 0.8957999666520209 | 0.1866900003632566 | F | F | F |
| 0.6426140022806806 | 0.7857025331991636 | 0.2651976593074394 | T | T | T |
| 0.1424451047103190 | 0.2865287279595421 | 0.2725965278281492 | T | T | T |
| 0.4545100164061751 | 0.1542000069403500 | 0.1726800107755011 | F | F | F |
| 0.9545099696828743 | 0.6542000234215450 | 0.1726800107755011 | F | F | F |

|                    |                    |                    |   |   |   |
|--------------------|--------------------|--------------------|---|---|---|
| 0.1454900069574379 | 0.7638599674827660 | 0.1037499962351802 | F | F | F |
| 0.6454899836251471 | 0.2638599840124058 | 0.1037499962351802 | F | F | F |
| 0.1903399943208370 | 0.2862900056299651 | 0.1125700076069052 | F | F | F |
| 0.6903399592441062 | 0.7862899726295041 | 0.1125700076069052 | F | F | F |
| 0.9096599473797582 | 0.8817800337476598 | 0.1725899975309915 | F | F | F |
| 0.4096599940051888 | 0.3817800007264367 | 0.1725899975309915 | F | F | F |
| 0.4096599940051888 | 0.6682199563951130 | 0.1867800022190593 | F | F | F |
| 0.9096599473797582 | 0.1682200058663881 | 0.1867800022190593 | F | F | F |
| 0.6890605783082933 | 0.2668588782770058 | 0.2533420431689137 | T | T | T |
| 0.1860655686823733 | 0.7610407867886195 | 0.2529901525736875 | T | T | T |
| 0.4180599929386020 | 0.7820899854364924 | 0.0870100033908230 | F | F | F |
| 0.9180600395836080 | 0.2820900184369464 | 0.0870100033908230 | F | F | F |
| 0.9177894975857299 | 0.7654214748144454 | 0.2862740935699506 | T | T | T |
| 0.4177918638652400 | 0.2658614157857357 | 0.2812351247566625 | T | T | T |
| 0.6819400070927131 | 0.4224300249338668 | 0.1752299989317905 | F | F | F |
| 0.1819400070339938 | 0.9224299589225708 | 0.1752299989317905 | F | F | F |
| 0.1819400070339938 | 0.1275800053274239 | 0.1841400008182603 | F | F | F |
| 0.6819400070927131 | 0.6275799970331946 | 0.1841400008182603 | F | F | F |
| 0.6362940655023408 | 0.3909849219934927 | 0.3519826211529562 | T | T | T |
| 0.1369184785546551 | 0.8963385751510842 | 0.3515415600499452 | T | T | T |
| 0.9570600322817313 | 0.0118909717485494 | 0.2704949514170281 | T | T | T |
| 0.4554826693655087 | 0.5141645544934548 | 0.2713391714744873 | T | T | T |
| 0.1507867373287510 | 0.6497369072926489 | 0.3653492099347417 | T | T | T |
| 0.6423432580485766 | 0.1510552167851742 | 0.3630978387890735 | T | T | T |
| 0.4545100164061751 | 0.5361400390910305 | 0.0984700048222891 | F | F | F |
| 0.9545099696828743 | 0.0361399978344039 | 0.0984700048222891 | F | F | F |
| 0.4096599940051888 | 0.0137099999541945 | 0.0896599967858833 | F | F | F |
| 0.9096599473797582 | 0.5137100339442853 | 0.0896599967858833 | F | F | F |
| 0.7107865208476341 | 0.9178164911808224 | 0.3625097725957787 | T | T | T |
| 0.3058787463764290 | 0.3977744934554437 | 0.3907766048766419 | T | T | T |
| 0.2018292065254457 | 0.1321853148763310 | 0.3567551818160482 | T | T | T |
| 0.6965579996136384 | 0.6370714563709470 | 0.3478093182454174 | T | T | T |
| 0.8998543939852581 | 0.5364869558455609 | 0.2820485126988075 | T | T | T |
| 0.4070839020821992 | 0.0378972717929216 | 0.2781293243923457 | T | T | T |
| 0.7401064408082831 | 0.7565278672979261 | 0.4602690566044458 | T | T | T |
| 0.6025651818380950 | 0.7187729957809452 | 0.5384416338278726 | T | T | T |
| 0.799999999960821  | 0.7581899815576136 | 0.1902599906343454 | F | F | F |
| 0.3000000233283728 | 0.7918100085159523 | 0.1691199954394378 | F | F | F |
| 0.3000000233283728 | 0.2581899980872535 | 0.1902599906343454 | F | F | F |
| 0.799999999960821  | 0.2918100085747710 | 0.1691199954394378 | F | F | F |
| 0.8336300498524380 | 0.0250000012150693 | 0.1796899987074170 | F | F | F |
| 0.7692920201261941 | 0.2680436802584296 | 0.3498765007297422 | T | T | T |
| 0.3336300032074320 | 0.5249999785261750 | 0.1796899987074170 | F | F | F |
| 0.2645255297817783 | 0.7741609569758410 | 0.3498682631120289 | T | T | T |

|                    |                    |                    |   |   |   |
|--------------------|--------------------|--------------------|---|---|---|
| 0.5473068345119785 | 0.9166663102680275 | 0.2818710804296174 | T | T | T |
| 0.5500000000156575 | 0.1331900063373723 | 0.0905399972845800 | F | F | F |
| 0.0325240863297509 | 0.4125359080446600 | 0.2791568894555496 | T | T | T |
| 0.0499999999569383 | 0.6331899898077324 | 0.0905399972845800 | F | F | F |
| 0.7932140611452496 | 0.0455448291434521 | 0.3407213355145302 | T | T | T |
| 0.2813465522897687 | 0.9993747917113467 | 0.3533757970196021 | T | T | T |
| 0.3002456170158467 | 0.5422975231310829 | 0.3501590695312942 | T | T | T |
| 0.7857217160918495 | 0.4998629164466948 | 0.3662403335098716 | T | T | T |
| 0.7626748905377099 | 0.7802750663427105 | 0.3511864229322939 | T | T | T |
| 0.8336300498524380 | 0.5249999785261750 | 0.1796899987074170 | F | F | F |
| 0.2732615858223184 | 0.2676136574001475 | 0.3521356482856675 | T | T | T |
| 0.3336300032074320 | 0.0250000012150693 | 0.1796899987074170 | F | F | F |
| 0.0476732155484143 | 0.8808502481976390 | 0.2584286336882684 | T | T | T |
| 0.0499999999569383 | 0.1668100002848689 | 0.1116700004375772 | F | F | F |
| 0.5473935266461822 | 0.3826206446928495 | 0.2572412646688136 | T | T | T |
| 0.5500000000156575 | 0.6668099508135938 | 0.1116700004375772 | F | F | F |
| 0.5500000000156575 | 0.4000000197871287 | 0.1011099948343812 | F | F | F |
| 0.0478592557494295 | 0.1478036484448495 | 0.2716369525685707 | T | T | T |
| 0.5500000000156575 | 0.8999999537758328 | 0.1011099948343812 | F | F | F |
| 0.0492889149833857 | 0.6457495256996566 | 0.2732391286241125 | T | T | T |
| 0.0499999999569383 | 0.4000000197871287 | 0.1011099948343812 | F | F | F |
| 0.0499999999569383 | 0.8999999537758328 | 0.1011099948343812 | F | F | F |
| 0.5491652214324176 | 0.6499291365303250 | 0.2661432171523543 | T | T | T |
| 0.5516129524474067 | 0.1495510426260367 | 0.2690075409236883 | T | T | T |
| 0.3643749353608357 | 0.5535828958050288 | 0.4868407227058356 | T | T | T |
| 0.4972720106572197 | 0.4395111567246417 | 0.4208828648140184 | T | T | T |
| 0.6884870329933932 | 0.5092110421139964 | 0.4847958414764975 | T | T | T |
| 0.5500039859092354 | 0.6254866038708187 | 0.4222284620072188 | T | T | T |
| 0.6471837919352339 | 0.7077785600008966 | 0.4785872028923990 | T | T | T |
| 0.5304476940589424 | 0.6733609332113417 | 0.5430213709692779 | T | T | T |

pt4 TS2

1.0000000000000000

|                     |                     |                     |
|---------------------|---------------------|---------------------|
| 10.2175998688000007 | 0.0000000000000000  | 0.0000000000000000  |
| 0.0000000000000000  | 14.4497995377000006 | 0.0000000000000000  |
| 0.0000000000000000  | 0.0000000000000000  | 20.9857006073000001 |

O In Pt C H

50 32 4 1 1

Selective dynamics

Direct

|                    |                    |                    |   |   |   |
|--------------------|--------------------|--------------------|---|---|---|
| 0.1819400070339938 | 0.5179200200303384 | 0.1152000000018631 | F | F | F |
| 0.6819400070927131 | 0.0179200014037875 | 0.1152000000018631 | F | F | F |

|                    |                    |                    |   |   |   |
|--------------------|--------------------|--------------------|---|---|---|
| 0.6798090047260530 | 0.0275063224283159 | 0.2542841313811905 | F | F | F |
| 0.1780098421634548 | 0.5200444886732143 | 0.2630883406356190 | F | F | F |
| 0.9134533905919042 | 0.3764019880093556 | 0.3588019343677189 | F | F | F |
| 0.4076206555910105 | 0.8830989591293985 | 0.3588483055103140 | F | F | F |
| 0.4249969939219937 | 0.6747904549018102 | 0.3490334642160988 | F | F | F |
| 0.9165908587371518 | 0.1621378967874776 | 0.3501674247753357 | F | F | F |
| 0.9545099696828743 | 0.3957999996524890 | 0.1866900003632566 | F | F | F |
| 0.4545100164061751 | 0.8957999666520564 | 0.1866900003632566 | F | F | F |
| 0.6413272975210731 | 0.7868379755559687 | 0.2644230339457323 | F | F | F |
| 0.1453218786575405 | 0.2866869311473295 | 0.2739855580450765 | F | F | F |
| 0.4545100164061751 | 0.1542000069403500 | 0.1726800107755011 | F | F | F |
| 0.9545099696828743 | 0.6542000234215450 | 0.1726800107755011 | F | F | F |
| 0.1454900069574379 | 0.7638599674828015 | 0.1037499962351802 | F | F | F |
| 0.6454899836251471 | 0.2638599840124058 | 0.1037499962351802 | F | F | F |
| 0.1903399943208370 | 0.2862900056299651 | 0.1125700076069052 | F | F | F |
| 0.6903399592441062 | 0.7862899726295396 | 0.1125700076069052 | F | F | F |
| 0.9096599473797582 | 0.8817800337476953 | 0.1725899975309915 | F | F | F |
| 0.4096599940051888 | 0.3817800007264509 | 0.1725899975309915 | F | F | F |
| 0.4096599940051888 | 0.6682199563951130 | 0.1867800022190593 | F | F | F |
| 0.9096599473797582 | 0.1682200058663881 | 0.1867800022190593 | F | F | F |
| 0.6897769157931180 | 0.2678870629422576 | 0.2540570917399734 | F | F | F |
| 0.1872982642365741 | 0.7613507782165740 | 0.2535311809858456 | F | F | F |
| 0.4180599929386020 | 0.7820899854365280 | 0.0870100033908230 | F | F | F |
| 0.9180600395836080 | 0.2820900184369464 | 0.0870100033908230 | F | F | F |
| 0.9172949181685226 | 0.7652058890960234 | 0.2851939455469079 | F | F | F |
| 0.4200643661501928 | 0.2636765617471681 | 0.2806042214375637 | F | F | F |
| 0.6819400070927131 | 0.4224300249338810 | 0.1752299989317905 | F | F | F |
| 0.1819400070339938 | 0.9224299589226064 | 0.1752299989317905 | F | F | F |
| 0.1819400070339938 | 0.1275800053274239 | 0.1841400008182603 | F | F | F |
| 0.6819400070927131 | 0.6275799970331946 | 0.1841400008182603 | F | F | F |
| 0.6350489636822871 | 0.3890546670578061 | 0.3552372338855108 | F | F | F |
| 0.1349247567467060 | 0.8961760996335215 | 0.3519402846549013 | F | F | F |
| 0.9562449650316296 | 0.0112941172036116 | 0.2705564017384532 | F | F | F |
| 0.4567655849486059 | 0.5158183666120024 | 0.2712585463650186 | F | F | F |
| 0.1503397554103429 | 0.6519849546374559 | 0.3650500187677181 | F | F | F |
| 0.6446150239404673 | 0.1496270597956695 | 0.3633474914778816 | F | F | F |
| 0.4545100164061751 | 0.5361400390910305 | 0.0984700048222891 | F | F | F |
| 0.9545099696828743 | 0.0361399978344039 | 0.0984700048222891 | F | F | F |
| 0.4096599940051888 | 0.0137099999541945 | 0.0896599967858833 | F | F | F |
| 0.9096599473797582 | 0.5137100339442853 | 0.0896599967858833 | F | F | F |
| 0.7133087981623518 | 0.9163335790037621 | 0.3690018076924844 | F | F | F |
| 0.3217534469883745 | 0.4023106448015739 | 0.3764439881169324 | F | F | F |
| 0.1979397747050555 | 0.1300736042714945 | 0.3538783806028931 | F | F | F |
| 0.6943316843169640 | 0.6421539905081062 | 0.3545627595946073 | F | F | F |

|                    |                    |                    |   |   |   |
|--------------------|--------------------|--------------------|---|---|---|
| 0.8972458430293528 | 0.5369573208084262 | 0.2843244987331417 | F | F | F |
| 0.4069458084613728 | 0.0378406273531411 | 0.2783007263103201 | F | F | F |
| 0.3881507203494650 | 0.2461273570623419 | 0.4493790989310682 | T | T | T |
| 0.5240579920221720 | 0.2927617562392797 | 0.5267337307825812 | T | T | T |
| 0.799999999960821  | 0.7581899815576492 | 0.1902599906343454 | F | F | F |
| 0.3000000233283728 | 0.7918100085159878 | 0.1691199954394378 | F | F | F |
| 0.3000000233283728 | 0.2581899980872535 | 0.1902599906343454 | F | F | F |
| 0.799999999960821  | 0.2918100085747710 | 0.1691199954394378 | F | F | F |
| 0.8336300498524380 | 0.0250000012150693 | 0.1796899987074170 | F | F | F |
| 0.7724749494329899 | 0.2659948889419752 | 0.3492384775401902 | F | F | F |
| 0.3336300032074320 | 0.5249999785261750 | 0.1796899987074170 | F | F | F |
| 0.2632283548016119 | 0.7756691901513619 | 0.3508153770973976 | F | F | F |
| 0.5428821851778096 | 0.9167228389723476 | 0.2814325582484543 | F | F | F |
| 0.5500000000156575 | 0.1331900063373723 | 0.0905399972845800 | F | F | F |
| 0.0338993692632599 | 0.4118486644806723 | 0.2786628032342762 | F | F | F |
| 0.049999999569383  | 0.6331899898077324 | 0.0905399972845800 | F | F | F |
| 0.7954926206237261 | 0.0434620994355797 | 0.3415612534441337 | F | F | F |
| 0.2793184242289684 | 0.9995133016892197 | 0.3533805590541945 | F | F | F |
| 0.2972453118680107 | 0.5452929389114090 | 0.3493516358703630 | F | F | F |
| 0.7926376388229883 | 0.4972647798474341 | 0.3706081031271040 | F | F | F |
| 0.7611920648902739 | 0.7825888399116678 | 0.3482849973138897 | F | F | F |
| 0.8336300498524380 | 0.5249999785261750 | 0.1796899987074170 | F | F | F |
| 0.2798342130236620 | 0.2632356352066907 | 0.3534176285655874 | F | F | F |
| 0.3336300032074320 | 0.0250000012150693 | 0.1796899987074170 | F | F | F |
| 0.0487677799839332 | 0.8810909700804928 | 0.2577710604652665 | F | F | F |
| 0.049999999569383  | 0.1668100002848689 | 0.1116700004375772 | F | F | F |
| 0.5456208222094290 | 0.3828254901534720 | 0.2582940055367473 | F | F | F |
| 0.5500000000156575 | 0.6668099508135938 | 0.1116700004375772 | F | F | F |
| 0.5500000000156575 | 0.4000000197871429 | 0.1011099948343812 | F | F | F |
| 0.0492258351322192 | 0.1476338841432678 | 0.2719962471514421 | F | F | F |
| 0.5500000000156575 | 0.8999999537758683 | 0.1011099948343812 | F | F | F |
| 0.0488231738431324 | 0.6459711554993675 | 0.2724941283669295 | F | F | F |
| 0.049999999569383  | 0.4000000197871429 | 0.1011099948343812 | F | F | F |
| 0.049999999569383  | 0.8999999537758683 | 0.1011099948343812 | F | F | F |
| 0.5487533501650077 | 0.6504042964874586 | 0.2653943883083016 | F | F | F |
| 0.5534730243955437 | 0.1487094103917528 | 0.2686771586555992 | F | F | F |
| 0.3615931226804392 | 0.5457001685285192 | 0.4859617710517412 | F | F | F |
| 0.4968522136726534 | 0.4271993191707395 | 0.4285079004065793 | F | F | F |
| 0.6855331984029007 | 0.5078787213543592 | 0.4854758955725345 | F | F | F |
| 0.5420575477353538 | 0.6097928886446624 | 0.4167851195505605 | F | F | F |
| 0.4644252947566088 | 0.3067702046846748 | 0.4687738062879774 | T | T | T |
| 0.6094675804502714 | 0.2634997913756934 | 0.5202644058883434 | T | T | T |

Pdpt3 ts2

1.0000000000000000  
10.2175998688000007 0.0000000000000000 0.0000000000000000  
0.0000000000000000 14.4497995377000006 0.0000000000000000  
0.0000000000000000 0.0000000000000000 20.9857006073000001

O In Pd Pt C H  
50 32 1 3 1 1

Selective dynamics

Direct

|                    |                    |                    |   |   |   |
|--------------------|--------------------|--------------------|---|---|---|
| 0.1819400070339938 | 0.5179200200303384 | 0.1152000000018631 | F | F | F |
| 0.6819400070927131 | 0.0179200014037875 | 0.1152000000018631 | F | F | F |
| 0.6795260695792962 | 0.0313458965436837 | 0.2520427887277563 | F | F | F |
| 0.1788807061398501 | 0.5176111626340969 | 0.2642778813835918 | F | F | F |
| 0.9100681016446899 | 0.3778399069229721 | 0.3593602537095535 | F | F | F |
| 0.4085254511212426 | 0.8814333758898414 | 0.3582233181475942 | F | F | F |
| 0.4241457919899574 | 0.6720988359760227 | 0.3514539868682860 | F | F | F |
| 0.9149780073292106 | 0.1637676528952241 | 0.3495333356256864 | F | F | F |
| 0.9545099696828743 | 0.3957999996524890 | 0.1866900003632566 | F | F | F |
| 0.4545100164061751 | 0.8957999666520493 | 0.1866900003632566 | F | F | F |
| 0.6415855286453720 | 0.7846285178524326 | 0.2651603563291047 | F | F | F |
| 0.1430577339926202 | 0.2861703850766233 | 0.2733964919438776 | F | F | F |
| 0.4545100164061751 | 0.1542000069403500 | 0.1726800107755011 | F | F | F |
| 0.9545099696828743 | 0.6542000234215450 | 0.1726800107755011 | F | F | F |
| 0.1454900069574379 | 0.7638599674827873 | 0.1037499962351802 | F | F | F |
| 0.6454899836251471 | 0.2638599840124058 | 0.1037499962351802 | F | F | F |
| 0.1903399943208370 | 0.2862900056299651 | 0.1125700076069052 | F | F | F |
| 0.6903399592441062 | 0.7862899726295254 | 0.1125700076069052 | F | F | F |
| 0.9096599473797582 | 0.8817800337476882 | 0.1725899975309915 | F | F | F |
| 0.4096599940051888 | 0.3817800007264509 | 0.1725899975309915 | F | F | F |
| 0.4096599940051888 | 0.6682199563951130 | 0.1867800022190593 | F | F | F |
| 0.9096599473797582 | 0.1682200058663881 | 0.1867800022190593 | F | F | F |
| 0.6899394610658831 | 0.2680307811576483 | 0.2540722905563726 | F | F | F |
| 0.1873065464236348 | 0.7607533227381467 | 0.2536269441301684 | F | F | F |
| 0.4180599929386020 | 0.7820899854365138 | 0.0870100033908230 | F | F | F |
| 0.9180600395836080 | 0.2820900184369464 | 0.0870100033908230 | F | F | F |
| 0.9180422196155433 | 0.7650489869496155 | 0.2863343187118872 | F | F | F |
| 0.4188732829056292 | 0.2656207668778450 | 0.2808163210184276 | F | F | F |
| 0.6819400070927131 | 0.4224300249338810 | 0.1752299989317905 | F | F | F |
| 0.1819400070339938 | 0.9224299589225993 | 0.1752299989317905 | F | F | F |
| 0.1819400070339938 | 0.1275800053274239 | 0.1841400008182603 | F | F | F |
| 0.6819400070927131 | 0.6275799970331946 | 0.1841400008182603 | F | F | F |
| 0.6328240795743625 | 0.3905105995632070 | 0.3536297506543065 | F | F | F |
| 0.1360202995261446 | 0.8962013869934822 | 0.3519723606738694 | F | F | F |
| 0.9571342560323330 | 0.0117560355225805 | 0.2705324791108339 | F | F | F |

|                    |                    |                    |   |   |   |
|--------------------|--------------------|--------------------|---|---|---|
| 0.4544214431064262 | 0.5146942031258703 | 0.2717725472505563 | F | F | F |
| 0.1514684219271416 | 0.6500155196832083 | 0.3651959209257924 | F | F | F |
| 0.6414138715535813 | 0.1506587091849241 | 0.3629882167221439 | F | F | F |
| 0.4545100164061751 | 0.5361400390910305 | 0.0984700048222891 | F | F | F |
| 0.9545099696828743 | 0.0361399978344039 | 0.0984700048222891 | F | F | F |
| 0.4096599940051888 | 0.0137099999541945 | 0.0896599967858833 | F | F | F |
| 0.9096599473797582 | 0.5137100339442853 | 0.0896599967858833 | F | F | F |
| 0.7099941981571902 | 0.9184476384251212 | 0.3606060824365542 | F | F | F |
| 0.3111497396419338 | 0.3957242243026045 | 0.3892561282308620 | F | F | F |
| 0.2008012740201224 | 0.1307963428604921 | 0.3576156418625018 | F | F | F |
| 0.6939830395559312 | 0.6366611761686016 | 0.3506358636082894 | F | F | F |
| 0.8992089207382179 | 0.5366735426359170 | 0.2828802734520295 | F | F | F |
| 0.4070632187748302 | 0.0379026572066294 | 0.2784105774552543 | F | F | F |
| 0.7038563926202386 | 0.7750525477136847 | 0.4564504433942673 | T | T | T |
| 0.5176194808790129 | 0.7685183010838230 | 0.5139163133147449 | T | T | T |
| 0.799999999960821  | 0.7581899815576350 | 0.1902599906343454 | F | F | F |
| 0.3000000233283728 | 0.7918100085159736 | 0.1691199954394378 | F | F | F |
| 0.3000000233283728 | 0.2581899980872535 | 0.1902599906343454 | F | F | F |
| 0.799999999960821  | 0.2918100085747710 | 0.1691199954394378 | F | F | F |
| 0.8336300498524380 | 0.0250000012150693 | 0.1796899987074170 | F | F | F |
| 0.7685481311331728 | 0.2669780690140939 | 0.3506408570489867 | F | F | F |
| 0.3336300032074320 | 0.5249999785261750 | 0.1796899987074170 | F | F | F |
| 0.2635263146257074 | 0.7747362054192450 | 0.3507709297371591 | F | F | F |
| 0.5472415245794693 | 0.9169014143148360 | 0.2814637819338017 | F | F | F |
| 0.5500000000156575 | 0.1331900063373723 | 0.0905399972845800 | F | F | F |
| 0.0315091231679077 | 0.4114647461636949 | 0.2791298736025780 | F | F | F |
| 0.0499999999569383 | 0.6331899898077324 | 0.0905399972845800 | F | F | F |
| 0.7932577340022888 | 0.0457145772002505 | 0.3402971495768981 | F | F | F |
| 0.2815956769579415 | 0.9986357638985979 | 0.3536187187076365 | F | F | F |
| 0.2979720587348922 | 0.5418668142249459 | 0.3497356307682438 | F | F | F |
| 0.7883856556600861 | 0.4989574887114827 | 0.3674720051513987 | F | F | F |
| 0.7620762131211194 | 0.7807517705798332 | 0.3501578339911831 | F | F | F |
| 0.8336300498524380 | 0.5249999785261750 | 0.1796899987074170 | F | F | F |
| 0.2757071657685941 | 0.2642144339590260 | 0.3517480270898332 | F | F | F |
| 0.3336300032074320 | 0.0250000012150693 | 0.1796899987074170 | F | F | F |
| 0.0484389835755223 | 0.8810125273698404 | 0.2581562237577160 | F | F | F |
| 0.0499999999569383 | 0.1668100002848689 | 0.1116700004375772 | F | F | F |
| 0.5473861370843878 | 0.3829040316895203 | 0.2570830372895188 | F | F | F |
| 0.5500000000156575 | 0.6668099508135938 | 0.1116700004375772 | F | F | F |
| 0.5500000000156575 | 0.4000000197871429 | 0.1011099948343812 | F | F | F |
| 0.0470348480707656 | 0.1477982480552029 | 0.2713527694680238 | F | F | F |
| 0.5500000000156575 | 0.8999999537758612 | 0.1011099948343812 | F | F | F |
| 0.0495199600671867 | 0.6456907779275269 | 0.2726098925322233 | F | F | F |
| 0.0499999999569383 | 0.4000000197871429 | 0.1011099948343812 | F | F | F |

|                    |                    |                    |   |   |   |
|--------------------|--------------------|--------------------|---|---|---|
| 0.0499999999569383 | 0.8999999537758612 | 0.1011099948343812 | F | F | F |
| 0.5496656926116827 | 0.6490331144576444 | 0.2660924211784703 | F | F | F |
| 0.5525110810661999 | 0.1495598317490661 | 0.2681969917786731 | F | F | F |
| 0.3544874717817876 | 0.5507435815487938 | 0.4866636486320743 | F | F | F |
| 0.4944617569037248 | 0.4405255980371905 | 0.4218971903770949 | F | F | F |
| 0.5437947243240231 | 0.6210996736919157 | 0.4246797661436617 | F | F | F |
| 0.6857742664551623 | 0.5078334213029052 | 0.4839676016904875 | F | F | F |
| 0.5992381562060487 | 0.7340971181677176 | 0.4675696120693331 | T | T | T |
| 0.5417144195862987 | 0.7445161352883363 | 0.5551048423002412 | T | T | T |

Pd2pt2 ts2

1.000000000000000

10.2175998688000007 0.0000000000000000 0.0000000000000000

0.0000000000000000 14.4497995377000006 0.0000000000000000

0.0000000000000000 0.0000000000000000 20.9857006073000001

|    |    |    |    |   |   |
|----|----|----|----|---|---|
| O  | In | Pd | Pt | C | H |
| 50 | 32 | 2  | 2  | 1 | 1 |

Selective dynamics

Direct

|                    |                    |                    |   |   |   |
|--------------------|--------------------|--------------------|---|---|---|
| 0.1819400070339938 | 0.5179200200303384 | 0.1152000000018631 | F | F | F |
| 0.6819400070927131 | 0.0179200014037875 | 0.1152000000018631 | F | F | F |
| 0.6791341587016788 | 0.0313190605357079 | 0.2521660414370999 | F | F | F |
| 0.1792440966870643 | 0.5180824957240944 | 0.2637522084415878 | F | F | F |
| 0.9125613765016354 | 0.3780241699183122 | 0.3595020917751270 | F | F | F |
| 0.4082590560136339 | 0.8817429954376337 | 0.3582791967490664 | F | F | F |
| 0.4248152323125467 | 0.6720344506515232 | 0.3511613069447961 | F | F | F |
| 0.9147750251150626 | 0.1641434986361716 | 0.3492341249014288 | F | F | F |
| 0.9545099696828743 | 0.395799996524819  | 0.1866900003632566 | F | F | F |
| 0.4545100164061751 | 0.8957999666520422 | 0.1866900003632566 | F | F | F |
| 0.6417524972863973 | 0.7847635296904656 | 0.2651041003487293 | F | F | F |
| 0.1425866236769906 | 0.2862838888287271 | 0.2723823076344516 | F | F | F |
| 0.4545100164061751 | 0.1542000069403500 | 0.1726800107755011 | F | F | F |
| 0.9545099696828743 | 0.6542000234215450 | 0.1726800107755011 | F | F | F |
| 0.1454900069574379 | 0.7638599674827873 | 0.1037499962351802 | F | F | F |
| 0.6454899836251471 | 0.2638599840124058 | 0.1037499962351802 | F | F | F |
| 0.1903399943208370 | 0.2862900056299651 | 0.1125700076069052 | F | F | F |
| 0.6903399592441062 | 0.7862899726295254 | 0.1125700076069052 | F | F | F |
| 0.9096599473797582 | 0.8817800337476811 | 0.1725899975309915 | F | F | F |
| 0.4096599940051888 | 0.3817800007264438 | 0.1725899975309915 | F | F | F |
| 0.4096599940051888 | 0.6682199563951130 | 0.1867800022190593 | F | F | F |
| 0.9096599473797582 | 0.1682200058663881 | 0.1867800022190593 | F | F | F |
| 0.6892359045373126 | 0.2670684786530799 | 0.2534792209463888 | F | F | F |
| 0.1875018212789854 | 0.7609908902046811 | 0.2536240332704409 | F | F | F |



|                    |                    |                    |   |   |   |
|--------------------|--------------------|--------------------|---|---|---|
| 0.4180599929386020 | 0.7820899854365138 | 0.0870100033908230 | F | F | F |
| 0.9180600395836080 | 0.2820900184369464 | 0.0870100033908230 | F | F | F |
| 0.9183224016519631 | 0.7650538375053912 | 0.2862477083432182 | F | F | F |
| 0.4180075370052307 | 0.2659896751701396 | 0.2812072347033592 | F | F | F |
| 0.6819400070927131 | 0.4224300249338810 | 0.1752299989317905 | F | F | F |
| 0.1819400070339938 | 0.9224299589225922 | 0.1752299989317905 | F | F | F |
| 0.1819400070339938 | 0.1275800053274239 | 0.1841400008182603 | F | F | F |
| 0.6819400070927131 | 0.6275799970331946 | 0.1841400008182603 | F | F | F |
| 0.6363729753942522 | 0.3915780042300625 | 0.3522202044856044 | F | F | F |
| 0.1359557678980465 | 0.8962169357457270 | 0.3519702273439691 | F | F | F |
| 0.9569452065201105 | 0.0117408330642306 | 0.2705314761710227 | F | F | F |
| 0.4545751100495252 | 0.5145938577702083 | 0.2721305701880681 | F | F | F |
| 0.1522824444988444 | 0.6500117390530136 | 0.3651164227238723 | F | F | F |
| 0.6416912976354467 | 0.1512050216625695 | 0.3630612624382579 | F | F | F |
| 0.4545100164061751 | 0.5361400390910305 | 0.0984700048222891 | F | F | F |
| 0.9545099696828743 | 0.0361399978344039 | 0.0984700048222891 | F | F | F |
| 0.4096599940051888 | 0.0137099999541945 | 0.0896599967858833 | F | F | F |
| 0.9096599473797582 | 0.5137100339442853 | 0.0896599967858833 | F | F | F |
| 0.7102048399488439 | 0.9184263223318467 | 0.3610057814699772 | F | F | F |
| 0.3064304077027273 | 0.3967508283720065 | 0.3898921755640714 | F | F | F |
| 0.2007585205253193 | 0.1315683787885007 | 0.3568887156312144 | F | F | F |
| 0.6944566706570683 | 0.6370050060273158 | 0.3505892119020118 | F | F | F |
| 0.8995629196813937 | 0.5370295749548575 | 0.2828172299091776 | F | F | F |
| 0.4068186229714783 | 0.0377214657660261 | 0.2783458460170962 | F | F | F |
| 0.7065839827299811 | 0.7725879770403310 | 0.4569773699614146 | T | T | T |
| 0.5225366079046765 | 0.7630952831245637 | 0.5161200848709200 | T | T | T |
| 0.7999999999960821 | 0.7581899815576350 | 0.1902599906343454 | F | F | F |
| 0.3000000233283728 | 0.7918100085159736 | 0.1691199954394378 | F | F | F |
| 0.3000000233283728 | 0.2581899980872535 | 0.1902599906343454 | F | F | F |
| 0.7999999999960821 | 0.2918100085747710 | 0.1691199954394378 | F | F | F |
| 0.8336300498524380 | 0.0250000012150693 | 0.1796899987074170 | F | F | F |
| 0.7689701922724765 | 0.2679042743849749 | 0.3499336049061057 | F | F | F |
| 0.3336300032074320 | 0.5249999785261750 | 0.1796899987074170 | F | F | F |
| 0.2639133658688522 | 0.7746995417059495 | 0.3507809382236786 | F | F | F |
| 0.5472137191439543 | 0.9169139991079263 | 0.2815179178765987 | F | F | F |
| 0.5500000000156575 | 0.1331900063373723 | 0.0905399972845800 | F | F | F |
| 0.0321480997428694 | 0.4119078756495185 | 0.2789846293535589 | F | F | F |
| 0.0499999999569383 | 0.6331899898077324 | 0.0905399972845800 | F | F | F |
| 0.7928980039983742 | 0.0460746545579482 | 0.3403248085544632 | F | F | F |
| 0.2808209577012590 | 0.9990787481896177 | 0.3533731607459600 | F | F | F |
| 0.2977698178776507 | 0.5406311353575077 | 0.3498329580951278 | F | F | F |
| 0.7888701217965917 | 0.4985263011569927 | 0.3674498354874274 | F | F | F |
| 0.7624905825769730 | 0.7809432398804219 | 0.3500480732794102 | F | F | F |
| 0.8336300498524380 | 0.5249999785261750 | 0.1796899987074170 | F | F | F |

|                    |                    |                    |   |   |   |
|--------------------|--------------------|--------------------|---|---|---|
| 0.2729860439631295 | 0.2663470589790862 | 0.3517625840493892 | F | F | F |
| 0.3336300032074320 | 0.0250000012150693 | 0.1796899987074170 | F | F | F |
| 0.0483103273681422 | 0.8810557869930236 | 0.2581877973843874 | F | F | F |
| 0.049999999569383  | 0.1668100002848689 | 0.1116700004375772 | F | F | F |
| 0.5476724542638962 | 0.3827176886721091 | 0.2572474764250998 | F | F | F |
| 0.5500000000156575 | 0.6668099508135938 | 0.1116700004375772 | F | F | F |
| 0.5500000000156575 | 0.4000000197871358 | 0.1011099948343812 | F | F | F |
| 0.0472390004328958 | 0.1478186478797667 | 0.2713049388123068 | F | F | F |
| 0.5500000000156575 | 0.8999999537758541 | 0.1011099948343812 | F | F | F |
| 0.0502257599315570 | 0.6457638587748917 | 0.2726399481427677 | F | F | F |
| 0.049999999569383  | 0.4000000197871358 | 0.1011099948343812 | F | F | F |
| 0.049999999569383  | 0.8999999537758541 | 0.1011099948343812 | F | F | F |
| 0.5497667663444474 | 0.6489725565187072 | 0.2659859450099731 | F | F | F |
| 0.5513295484812915 | 0.1497144980094802 | 0.2687292278689100 | F | F | F |
| 0.3552180119600763 | 0.5502890318023432 | 0.4846880317892897 | F | F | F |
| 0.4951385892472402 | 0.4376788046083533 | 0.4216928842892855 | F | F | F |
| 0.5445265343756276 | 0.6207037912204783 | 0.4238846177796560 | F | F | F |
| 0.6855964895835385 | 0.5083454138987591 | 0.4840100059976891 | F | F | F |
| 0.6028821424298414 | 0.7310571223733646 | 0.4686134975833198 | T | T | T |
| 0.5490227512417647 | 0.7381617330687292 | 0.5567206129731401 | T | T | T |

#### Pd3pt ts2

1.0000000000000000

|                     |                     |                     |
|---------------------|---------------------|---------------------|
| 10.2175998688000007 | 0.0000000000000000  | 0.0000000000000000  |
| 0.0000000000000000  | 14.4497995377000006 | 0.0000000000000000  |
| 0.0000000000000000  | 0.0000000000000000  | 20.9857006073000001 |

| O  | In | Pd | Pt | C | H |
|----|----|----|----|---|---|
| 50 | 32 | 3  | 1  | 1 | 1 |

#### Selective dynamics

##### Direct

|                    |                    |                    |   |   |   |
|--------------------|--------------------|--------------------|---|---|---|
| 0.1819400070339938 | 0.5179200200303384 | 0.1152000000018631 | F | F | F |
| 0.6819400070927131 | 0.0179200014037875 | 0.1152000000018631 | F | F | F |
| 0.6793560695200469 | 0.0309760709053108 | 0.2523550003065012 | F | F | F |
| 0.1795312384351817 | 0.5182439221497290 | 0.2638390175403842 | F | F | F |
| 0.9117805907133558 | 0.3789126468279420 | 0.3593927335248281 | F | F | F |
| 0.4085617290202421 | 0.8824411458828649 | 0.3584735615607073 | F | F | F |
| 0.4216612370040735 | 0.6728524640945324 | 0.3497572191655181 | F | F | F |
| 0.9148823994206765 | 0.1642831923644152 | 0.3491944044281681 | F | F | F |
| 0.9545099696828743 | 0.3957999996524890 | 0.1866900003632566 | F | F | F |
| 0.4545100164061751 | 0.8957999666520564 | 0.1866900003632566 | F | F | F |
| 0.6412772962140423 | 0.7854284877464792 | 0.2646701035017713 | F | F | F |
| 0.1426194180417752 | 0.2864163123245049 | 0.2724587020018490 | F | F | F |
| 0.4545100164061751 | 0.1542000069403500 | 0.1726800107755011 | F | F | F |

|                    |                    |                    |   |   |   |
|--------------------|--------------------|--------------------|---|---|---|
| 0.9545099696828743 | 0.6542000234215450 | 0.1726800107755011 | F | F | F |
| 0.1454900069574379 | 0.7638599674828015 | 0.1037499962351802 | F | F | F |
| 0.6454899836251471 | 0.2638599840124058 | 0.1037499962351802 | F | F | F |
| 0.1903399943208370 | 0.2862900056299651 | 0.1125700076069052 | F | F | F |
| 0.6903399592441062 | 0.7862899726295396 | 0.1125700076069052 | F | F | F |
| 0.9096599473797582 | 0.8817800337476953 | 0.1725899975309915 | F | F | F |
| 0.4096599940051888 | 0.3817800007264509 | 0.1725899975309915 | F | F | F |
| 0.4096599940051888 | 0.6682199563951130 | 0.1867800022190593 | F | F | F |
| 0.9096599473797582 | 0.1682200058663881 | 0.1867800022190593 | F | F | F |
| 0.6893027407123142 | 0.2670463340897768 | 0.2533997459607207 | F | F | F |
| 0.1864724886043589 | 0.7611395353238422 | 0.2532043975471794 | F | F | F |
| 0.4180599929386020 | 0.7820899854365280 | 0.0870100033908230 | F | F | F |
| 0.9180600395836080 | 0.2820900184369464 | 0.0870100033908230 | F | F | F |
| 0.9177667748014713 | 0.7655714458333662 | 0.2859402825301132 | F | F | F |
| 0.4181931248491750 | 0.2659438125126741 | 0.2810947222686764 | F | F | F |
| 0.6819400070927131 | 0.4224300249338810 | 0.1752299989317905 | F | F | F |
| 0.1819400070339938 | 0.9224299589226064 | 0.1752299989317905 | F | F | F |
| 0.1819400070339938 | 0.1275800053274239 | 0.1841400008182603 | F | F | F |
| 0.6819400070927131 | 0.6275799970331946 | 0.1841400008182603 | F | F | F |
| 0.6363818452990699 | 0.3916680488165625 | 0.3519338362266140 | F | F | F |
| 0.1364963294820427 | 0.8965058168973457 | 0.3517200939949348 | F | F | F |
| 0.9570412052332671 | 0.0119651630731639 | 0.2704587021614415 | F | F | F |
| 0.4548054541141298 | 0.5145130010854828 | 0.2717698072186678 | F | F | F |
| 0.1497696050173616 | 0.6504144018795657 | 0.3652181766678595 | F | F | F |
| 0.6422965557544202 | 0.1512559289138764 | 0.3630143469955343 | F | F | F |
| 0.4545100164061751 | 0.5361400390910305 | 0.0984700048222891 | F | F | F |
| 0.9545099696828743 | 0.0361399978344039 | 0.0984700048222891 | F | F | F |
| 0.4096599940051888 | 0.0137099999541945 | 0.0896599967858833 | F | F | F |
| 0.9096599473797582 | 0.5137100339442853 | 0.0896599967858833 | F | F | F |
| 0.7112176245793194 | 0.9178522153020552 | 0.3616063215643024 | F | F | F |
| 0.3058721250472090 | 0.3968564082108799 | 0.3899448827662582 | F | F | F |
| 0.2011331924876103 | 0.1318296379841328 | 0.3569024743720561 | F | F | F |
| 0.6965942720817253 | 0.6373486999945612 | 0.3492042908870090 | F | F | F |
| 0.8999326384960327 | 0.5366467457043882 | 0.2822740488433126 | F | F | F |
| 0.4069728869159093 | 0.0380409795287093 | 0.2781910051793588 | F | F | F |
| 0.7032991527108763 | 0.7716061191208539 | 0.4591930976186447 | T | T | T |
| 0.5232480415546945 | 0.7552544424377103 | 0.5211576448261042 | T | T | T |
| 0.7999999999960821 | 0.7581899815576492 | 0.1902599906343454 | F | F | F |
| 0.3000000233283728 | 0.7918100085159878 | 0.1691199954394378 | F | F | F |
| 0.3000000233283728 | 0.2581899980872535 | 0.1902599906343454 | F | F | F |
| 0.7999999999960821 | 0.2918100085747710 | 0.1691199954394378 | F | F | F |
| 0.8336300498524380 | 0.0250000012150693 | 0.1796899987074170 | F | F | F |
| 0.7693732714730430 | 0.2684125574357878 | 0.3498975663563257 | F | F | F |
| 0.3336300032074320 | 0.5249999785261750 | 0.1796899987074170 | F | F | F |

|                    |                    |                    |   |   |   |
|--------------------|--------------------|--------------------|---|---|---|
| 0.2639210287234945 | 0.7746036435771941 | 0.3501791643787513 | F | F | F |
| 0.5470204451759244 | 0.9169430747627842 | 0.2816195780713002 | F | F | F |
| 0.5500000000156575 | 0.1331900063373723 | 0.0905399972845800 | F | F | F |
| 0.0322359586919703 | 0.4122721130282514 | 0.2790924307522928 | F | F | F |
| 0.0499999999569383 | 0.6331899898077324 | 0.0905399972845800 | F | F | F |
| 0.7932005439455310 | 0.0458930794316004 | 0.3404314247500508 | F | F | F |
| 0.2813017280969845 | 0.9993637178979213 | 0.3533827898761643 | F | F | F |
| 0.2981417993343740 | 0.5421963280987825 | 0.3498667911870825 | F | F | F |
| 0.7876125894729711 | 0.5000249606369778 | 0.3670989652986663 | F | F | F |
| 0.7612024486938296 | 0.7801305826269598 | 0.3498201587521237 | F | F | F |
| 0.8336300498524380 | 0.5249999785261750 | 0.1796899987074170 | F | F | F |
| 0.2735345464867436 | 0.2665883437888894 | 0.3517743545864320 | F | F | F |
| 0.3336300032074320 | 0.0250000012150693 | 0.1796899987074170 | F | F | F |
| 0.0479428575986915 | 0.8810910247384598 | 0.2582999775718022 | F | F | F |
| 0.0499999999569383 | 0.1668100002848689 | 0.1116700004375772 | F | F | F |
| 0.5477122211668828 | 0.3830193347274786 | 0.2572790620250416 | F | F | F |
| 0.5500000000156575 | 0.6668099508135938 | 0.1116700004375772 | F | F | F |
| 0.5500000000156575 | 0.4000000197871429 | 0.1011099948343812 | F | F | F |
| 0.0474098488460299 | 0.1479949046906128 | 0.2713921072413115 | F | F | F |
| 0.5500000000156575 | 0.8999999537758683 | 0.1011099948343812 | F | F | F |
| 0.0492072378527553 | 0.6458657591217474 | 0.2728156637914978 | F | F | F |
| 0.0499999999569383 | 0.4000000197871429 | 0.1011099948343812 | F | F | F |
| 0.0499999999569383 | 0.8999999537758683 | 0.1011099948343812 | F | F | F |
| 0.5495513548049118 | 0.6493537952562818 | 0.2667095968916300 | F | F | F |
| 0.5518701313575178 | 0.1497292175323253 | 0.2687715444367669 | F | F | F |
| 0.3530907144262443 | 0.5479299855088584 | 0.4835265982601769 | F | F | F |
| 0.4950256464638443 | 0.4370154749633244 | 0.4209706847903334 | F | F | F |
| 0.5433708515549682 | 0.6222153637224395 | 0.4237077439235293 | F | F | F |
| 0.6837831176819691 | 0.5078958617479117 | 0.4835736192255666 | F | F | F |
| 0.6024086347471780 | 0.7285781985267121 | 0.4718697180742097 | T | T | T |
| 0.5542793926241103 | 0.7291714871334137 | 0.5607140471561207 | T | T | T |

Pd4 ts2

1.0000000000000000

|                     |                     |                     |
|---------------------|---------------------|---------------------|
| 10.2175998688000007 | 0.0000000000000000  | 0.0000000000000000  |
| 0.0000000000000000  | 14.4497995377000006 | 0.0000000000000000  |
| 0.0000000000000000  | 0.0000000000000000  | 20.9857006073000001 |

|    |    |    |   |   |
|----|----|----|---|---|
| O  | In | Pd | C | H |
| 50 | 32 | 4  | 1 | 1 |

Selective dynamics

Direct

|                    |                    |                    |   |   |   |
|--------------------|--------------------|--------------------|---|---|---|
| 0.1819400070339938 | 0.5179200200303384 | 0.1152000000018631 | F | F | F |
| 0.6819400070927131 | 0.0179200014037875 | 0.1152000000018631 | F | F | F |

|                    |                    |                    |   |   |   |
|--------------------|--------------------|--------------------|---|---|---|
| 0.6797783178500083 | 0.0297850647675801 | 0.2532096452840022 | F | F | F |
| 0.1797381106816900 | 0.5177925680939310 | 0.2646256897408890 | F | F | F |
| 0.9093520013828069 | 0.3803364106831140 | 0.3598781817538566 | F | F | F |
| 0.4078627434939222 | 0.8828598745274974 | 0.3590927389338319 | F | F | F |
| 0.4194345676885618 | 0.6746159567071857 | 0.3466525761544119 | F | F | F |
| 0.9141767562845260 | 0.1640971680708248 | 0.3494675499492530 | F | F | F |
| 0.9545099696828743 | 0.395799996524890  | 0.1866900003632566 | F | F | F |
| 0.4545100164061751 | 0.8957999666520422 | 0.1866900003632566 | F | F | F |
| 0.6432316753690372 | 0.7863073204643669 | 0.2653041803275755 | F | F | F |
| 0.1427321047243666 | 0.2866941254650470 | 0.2733602318291020 | F | F | F |
| 0.4545100164061751 | 0.1542000069403500 | 0.1726800107755011 | F | F | F |
| 0.9545099696828743 | 0.6542000234215450 | 0.1726800107755011 | F | F | F |
| 0.1454900069574379 | 0.7638599674827873 | 0.1037499962351802 | F | F | F |
| 0.6454899836251471 | 0.2638599840124058 | 0.1037499962351802 | F | F | F |
| 0.1903399943208370 | 0.2862900056299651 | 0.1125700076069052 | F | F | F |
| 0.6903399592441062 | 0.7862899726295254 | 0.1125700076069052 | F | F | F |
| 0.9096599473797582 | 0.8817800337476811 | 0.1725899975309915 | F | F | F |
| 0.4096599940051888 | 0.3817800007264509 | 0.1725899975309915 | F | F | F |
| 0.4096599940051888 | 0.6682199563951130 | 0.1867800022190593 | F | F | F |
| 0.9096599473797582 | 0.1682200058663881 | 0.1867800022190593 | F | F | F |
| 0.6890429459240792 | 0.2672081207045025 | 0.2536403537166620 | F | F | F |
| 0.1859416795214841 | 0.7614723420386795 | 0.2528771872841347 | F | F | F |
| 0.4180599929386020 | 0.7820899854365138 | 0.0870100033908230 | F | F | F |
| 0.9180600395836080 | 0.2820900184369464 | 0.0870100033908230 | F | F | F |
| 0.9177853477708666 | 0.7653559869813762 | 0.2859821415131307 | F | F | F |
| 0.4179042457054152 | 0.2656234813257825 | 0.2811043813874505 | F | F | F |
| 0.6819400070927131 | 0.4224300249338810 | 0.1752299989317905 | F | F | F |
| 0.1819400070339938 | 0.9224299589225922 | 0.1752299989317905 | F | F | F |
| 0.1819400070339938 | 0.1275800053274239 | 0.1841400008182603 | F | F | F |
| 0.6819400070927131 | 0.6275799970331946 | 0.1841400008182603 | F | F | F |
| 0.6355993937116935 | 0.3915018376844159 | 0.3531271201969872 | F | F | F |
| 0.1359941057138627 | 0.8972483626604841 | 0.3514569407210644 | F | F | F |
| 0.9567298600230103 | 0.0121229977731616 | 0.2705893948915730 | F | F | F |
| 0.4545757625573188 | 0.5142046969829153 | 0.2711476973501448 | F | F | F |
| 0.1490697300607380 | 0.6508309718239218 | 0.3651528928543897 | F | F | F |
| 0.6420571503687711 | 0.1504186298115329 | 0.3632286993445248 | F | F | F |
| 0.4545100164061751 | 0.5361400390910305 | 0.0984700048222891 | F | F | F |
| 0.9545099696828743 | 0.0361399978344039 | 0.0984700048222891 | F | F | F |
| 0.4096599940051888 | 0.0137099999541945 | 0.0896599967858833 | F | F | F |
| 0.9096599473797582 | 0.5137100339442853 | 0.0896599967858833 | F | F | F |
| 0.7124866056130870 | 0.9159103355529510 | 0.3644182845416353 | F | F | F |
| 0.3102628215651677 | 0.3956013242701459 | 0.3934484053536380 | F | F | F |
| 0.2017423215263818 | 0.1322743151946639 | 0.3566412392319336 | F | F | F |
| 0.6939832630105016 | 0.6362844248975676 | 0.3449089835533528 | F | F | F |

|                    |                    |                    |   |   |   |
|--------------------|--------------------|--------------------|---|---|---|
| 0.9001352059395202 | 0.5364606692665390 | 0.2813001966580302 | F | F | F |
| 0.4073958230185468 | 0.0376799676660156 | 0.2780752645295763 | F | F | F |
| 0.7677991348856992 | 0.7318017332481119 | 0.4594650386998822 | T | T | T |
| 0.6527888840042380 | 0.6873935526457515 | 0.5469181550492195 | T | T | T |
| 0.799999999960821  | 0.7581899815576350 | 0.1902599906343454 | F | F | F |
| 0.3000000233283728 | 0.7918100085159736 | 0.1691199954394378 | F | F | F |
| 0.3000000233283728 | 0.2581899980872535 | 0.1902599906343454 | F | F | F |
| 0.799999999960821  | 0.2918100085747710 | 0.1691199954394378 | F | F | F |
| 0.8336300498524380 | 0.0250000012150693 | 0.1796899987074170 | F | F | F |
| 0.7684241791739410 | 0.2680702655779257 | 0.3503565283826404 | F | F | F |
| 0.3336300032074320 | 0.5249999785261750 | 0.1796899987074170 | F | F | F |
| 0.2622733907856158 | 0.7750801700555883 | 0.3501239945867951 | F | F | F |
| 0.5471323906128873 | 0.9160558459663548 | 0.2821829924249357 | F | F | F |
| 0.5500000000156575 | 0.1331900063373723 | 0.0905399972845800 | F | F | F |
| 0.0318730546718271 | 0.4121412045988961 | 0.2794467086064074 | F | F | F |
| 0.0499999999569383 | 0.6331899898077324 | 0.0905399972845800 | F | F | F |
| 0.7932042523042995 | 0.0446220208667114 | 0.3414066742359267 | F | F | F |
| 0.2812955268399051 | 0.9997498747682556 | 0.3532914162647387 | F | F | F |
| 0.2996370281479344 | 0.5424033993074886 | 0.3504009282512328 | F | F | F |
| 0.7826840236544612 | 0.5008238742126423 | 0.3639122855018755 | F | F | F |
| 0.7638587390323011 | 0.7781300745033590 | 0.3519133939587320 | F | F | F |
| 0.8336300498524380 | 0.5249999785261750 | 0.1796899987074170 | F | F | F |
| 0.2747505436758928 | 0.2675030821427384 | 0.3528342112973348 | F | F | F |
| 0.3336300032074320 | 0.0250000012150693 | 0.1796899987074170 | F | F | F |
| 0.0470927083214860 | 0.8809581885200473 | 0.2583381167047847 | F | F | F |
| 0.0499999999569383 | 0.1668100002848689 | 0.1116700004375772 | F | F | F |
| 0.5468798123665835 | 0.3828171977332957 | 0.2578420112810420 | F | F | F |
| 0.5500000000156575 | 0.6668099508135938 | 0.1116700004375772 | F | F | F |
| 0.5500000000156575 | 0.4000000197871429 | 0.1011099948343812 | F | F | F |
| 0.0477089539719628 | 0.1480681024164952 | 0.2719546642216883 | F | F | F |
| 0.5500000000156575 | 0.8999999537758541 | 0.1011099948343812 | F | F | F |
| 0.0492735017394210 | 0.6459266176778158 | 0.2731177369805948 | F | F | F |
| 0.0499999999569383 | 0.4000000197871429 | 0.1011099948343812 | F | F | F |
| 0.0499999999569383 | 0.8999999537758541 | 0.1011099948343812 | F | F | F |
| 0.5487242526002376 | 0.6502340638635076 | 0.2654617820189102 | F | F | F |
| 0.5520178588214435 | 0.1493247621291189 | 0.2689177057259684 | F | F | F |
| 0.3530201103321886 | 0.5625374458904631 | 0.4804222541108629 | F | F | F |
| 0.4973236190778181 | 0.4482929550492472 | 0.4211470206642218 | F | F | F |
| 0.6983555720618355 | 0.5296368354945002 | 0.4844746436403256 | F | F | F |
| 0.5445513040949024 | 0.6371321977778592 | 0.4201626102027163 | F | F | F |
| 0.6835799675571081 | 0.6768059341178869 | 0.4821991338777707 | T | T | T |
| 0.5810626811280954 | 0.7318514579125620 | 0.5508553340922928 | T | T | T |



CONTCAR\4 cis-cooh-pt4

1.000000000000000

|                     |                     |                     |
|---------------------|---------------------|---------------------|
| 10.2175998688000007 | 0.0000000000000000  | 0.0000000000000000  |
| 0.0000000000000000  | 14.4497995377000006 | 0.0000000000000000  |
| 0.0000000000000000  | 0.0000000000000000  | 20.9857006073000001 |

|    |    |    |   |   |
|----|----|----|---|---|
| O  | In | Pt | C | H |
| 50 | 32 | 4  | 1 | 1 |

Selective dynamics

Direct

|                    |                    |                    |   |   |   |
|--------------------|--------------------|--------------------|---|---|---|
| 0.1819400070339938 | 0.5179200200303384 | 0.1152000000018631 | F | F | F |
| 0.6819400070927131 | 0.0179200014037875 | 0.1152000000018631 | F | F | F |
| 0.6794919931856143 | 0.0311643712542207 | 0.2519220414253383 | T | T | T |
| 0.1787013743565353 | 0.5179588071831489 | 0.2648392965621937 | T | T | T |
| 0.9113749447549182 | 0.3771148710716261 | 0.3589508881336556 | T | T | T |
| 0.4083087364410432 | 0.8816378140990651 | 0.3589905647920659 | T | T | T |
| 0.4238808415722701 | 0.6720168359979439 | 0.3518413030745080 | T | T | T |
| 0.9154083698816535 | 0.1632488204276612 | 0.3497225489892486 | T | T | T |
| 0.9545099696828743 | 0.3957999996524748 | 0.1866900003632566 | F | F | F |
| 0.4545100164061751 | 0.8957999666520209 | 0.1866900003632566 | F | F | F |
| 0.6407141161688372 | 0.7842177459595518 | 0.2654171777192289 | T | T | T |
| 0.1432702235110526 | 0.2858966681712545 | 0.2730472088295741 | T | T | T |
| 0.4545100164061751 | 0.1542000069403500 | 0.1726800107755011 | F | F | F |
| 0.9545099696828743 | 0.6542000234215450 | 0.1726800107755011 | F | F | F |
| 0.1454900069574379 | 0.7638599674827660 | 0.1037499962351802 | F | F | F |
| 0.6454899836251471 | 0.2638599840124058 | 0.1037499962351802 | F | F | F |
| 0.1903399943208370 | 0.2862900056299651 | 0.1125700076069052 | F | F | F |
| 0.6903399592441062 | 0.7862899726295041 | 0.1125700076069052 | F | F | F |
| 0.9096599473797582 | 0.8817800337476598 | 0.1725899975309915 | F | F | F |
| 0.4096599940051888 | 0.3817800007264367 | 0.1725899975309915 | F | F | F |
| 0.4096599940051888 | 0.6682199563951130 | 0.1867800022190593 | F | F | F |
| 0.9096599473797582 | 0.1682200058663881 | 0.1867800022190593 | F | F | F |
| 0.6902761371372890 | 0.2679688028022369 | 0.2541170125004442 | T | T | T |
| 0.1873307415944439 | 0.7611047214439282 | 0.2536026553529425 | T | T | T |
| 0.4180599929386020 | 0.7820899854364924 | 0.0870100033908230 | F | F | F |
| 0.9180600395836080 | 0.2820900184369464 | 0.0870100033908230 | F | F | F |
| 0.9169486257256096 | 0.7651800456192746 | 0.2861848628008445 | T | T | T |
| 0.4194602300831463 | 0.2650508929414670 | 0.2804080398711335 | T | T | T |
| 0.6819400070927131 | 0.4224300249338668 | 0.1752299989317905 | F | F | F |
| 0.1819400070339938 | 0.9224299589225708 | 0.1752299989317905 | F | F | F |
| 0.1819400070339938 | 0.1275800053274239 | 0.1841400008182603 | F | F | F |
| 0.6819400070927131 | 0.6275799970331946 | 0.1841400008182603 | F | F | F |
| 0.6339606631414370 | 0.3897315992059802 | 0.3535763741883500 | T | T | T |
| 0.1355730129203465 | 0.8964084239991763 | 0.3519252500876675 | T | T | T |



|                    |                    |                    |   |   |   |
|--------------------|--------------------|--------------------|---|---|---|
| 0.9570155673158496 | 0.0116745411631243 | 0.2704817891033358 | T | T | T |
| 0.4538737419910461 | 0.5146861908288116 | 0.2721382702387416 | T | T | T |
| 0.1494393497237638 | 0.6513644228536890 | 0.3648504048460026 | T | T | T |
| 0.6415623842046188 | 0.1504593841279487 | 0.3630441087676957 | T | T | T |
| 0.4545100164061751 | 0.5361400390910305 | 0.0984700048222891 | F | F | F |
| 0.9545099696828743 | 0.0361399978344039 | 0.0984700048222891 | F | F | F |
| 0.4096599940051888 | 0.013709999541945  | 0.0896599967858833 | F | F | F |
| 0.9096599473797582 | 0.5137100339442853 | 0.0896599967858833 | F | F | F |
| 0.7089238403184268 | 0.9188103021958227 | 0.3607024350479691 | T | T | T |
| 0.3152121879005989 | 0.3946933522540021 | 0.3867128749607716 | T | T | T |
| 0.2005087742513822 | 0.1307616286499922 | 0.3576927268288728 | T | T | T |
| 0.6920345835523847 | 0.6362583756578672 | 0.3521197359662054 | T | T | T |
| 0.8985623189182164 | 0.5369821037149762 | 0.2829746798062303 | T | T | T |
| 0.4070609939246523 | 0.0377166748516444 | 0.2784234989684649 | T | T | T |
| 0.7103723645060498 | 0.7735178418084985 | 0.4557453602955945 | T | T | T |
| 0.5358860171605926 | 0.7582248816958455 | 0.5192636675364568 | T | T | T |
| 0.799999999960821  | 0.7581899815576136 | 0.1902599906343454 | F | F | F |
| 0.3000000233283728 | 0.7918100085159523 | 0.1691199954394378 | F | F | F |
| 0.3000000233283728 | 0.2581899980872535 | 0.1902599906343454 | F | F | F |
| 0.799999999960821  | 0.2918100085747710 | 0.1691199954394378 | F | F | F |
| 0.8336300498524380 | 0.0250000012150693 | 0.1796899987074170 | F | F | F |
| 0.7692549438210179 | 0.2665417109255159 | 0.3506248076253726 | T | T | T |
| 0.3336300032074320 | 0.5249999785261750 | 0.1796899987074170 | F | F | F |
| 0.2632168784488229 | 0.7748557351697301 | 0.3509193962718697 | T | T | T |
| 0.5468179190041766 | 0.9168492809459394 | 0.2814944872912548 | T | T | T |
| 0.5500000000156575 | 0.1331900063373723 | 0.0905399972845800 | F | F | F |
| 0.0322551445382544 | 0.4115089776573981 | 0.2788711780212623 | T | T | T |
| 0.0499999999569383 | 0.6331899898077324 | 0.0905399972845800 | F | F | F |
| 0.7932455886876610 | 0.0455986148355549 | 0.3401670478356067 | T | T | T |
| 0.2811252296369844 | 0.9986826253370324 | 0.3534570003319004 | T | T | T |
| 0.2955828903046012 | 0.5422656047330747 | 0.3515836016766016 | T | T | T |
| 0.7902528532076474 | 0.4982756267478479 | 0.3677562038284918 | T | T | T |
| 0.7613657485536862 | 0.7809886008187092 | 0.3501682216261841 | T | T | T |
| 0.8336300498524380 | 0.5249999785261750 | 0.1796899987074170 | F | F | F |
| 0.2761332058894581 | 0.2636622022427346 | 0.3511875721305486 | T | T | T |
| 0.3336300032074320 | 0.0250000012150693 | 0.1796899987074170 | F | F | F |
| 0.0482477934678158 | 0.8809734643343745 | 0.2580815572822459 | T | T | T |
| 0.0499999999569383 | 0.1668100002848689 | 0.1116700004375772 | F | F | F |
| 0.5471601843619069 | 0.3830873034741913 | 0.2572031916115520 | T | T | T |
| 0.5500000000156575 | 0.6668099508135938 | 0.1116700004375772 | F | F | F |
| 0.5500000000156575 | 0.4000000197871287 | 0.1011099948343812 | F | F | F |
| 0.0469318196087585 | 0.1477756119106886 | 0.2712521047841818 | T | T | T |
| 0.5500000000156575 | 0.8999999537758328 | 0.1011099948343812 | F | F | F |
| 0.0491855587716401 | 0.6459644340945232 | 0.2725161621056955 | T | T | T |

|                    |                    |                    |   |   |   |
|--------------------|--------------------|--------------------|---|---|---|
| 0.049999999569383  | 0.4000000197871287 | 0.1011099948343812 | F | F | F |
| 0.049999999569383  | 0.8999999537758328 | 0.1011099948343812 | F | F | F |
| 0.5482754200044724 | 0.6488656592137190 | 0.2661795778085363 | T | T | T |
| 0.5529416146144257 | 0.1494935732659215 | 0.2681177667415113 | T | T | T |
| 0.3586257894674105 | 0.5500909825170197 | 0.4852819101377719 | T | T | T |
| 0.4975729298094080 | 0.4387117081493344 | 0.4213192073569161 | T | T | T |
| 0.5458240801758691 | 0.6199213281762042 | 0.4243129063010969 | T | T | T |
| 0.6877290700405894 | 0.5067376386875395 | 0.4837725128009183 | T | T | T |
| 0.6067456529164943 | 0.7311119048126855 | 0.4686125433794928 | T | T | T |
| 0.5794935947940161 | 0.8132872572789367 | 0.5371798270436869 | T | T | T |

CONTCAR(4) cis- cooh-pdpt3

1.000000000000000

|                     |                     |                     |
|---------------------|---------------------|---------------------|
| 10.2175998688000007 | 0.0000000000000000  | 0.0000000000000000  |
| 0.0000000000000000  | 14.4497995377000006 | 0.0000000000000000  |
| 0.0000000000000000  | 0.0000000000000000  | 20.9857006073000001 |

|    |    |    |    |   |   |
|----|----|----|----|---|---|
| O  | In | Pd | Pt | C | H |
| 50 | 32 | 1  | 3  | 1 | 1 |

Selective dynamics

Direct

|                    |                    |                    |   |   |   |
|--------------------|--------------------|--------------------|---|---|---|
| 0.1819400070339938 | 0.5179200200303384 | 0.1152000000018631 | F | F | F |
| 0.6819400070927131 | 0.0179200014037875 | 0.1152000000018631 | F | F | F |
| 0.6794569748901722 | 0.0313173821022943 | 0.2520033679800022 | T | T | T |
| 0.1787544225555564 | 0.5177461122283518 | 0.2642737805676418 | T | T | T |
| 0.9101233006852496 | 0.3775282710766916 | 0.3592296404003079 | T | T | T |
| 0.4083973443048876 | 0.8816766784852703 | 0.3588673459389184 | T | T | T |
| 0.4243274430944766 | 0.6719099802262178 | 0.3521488586423729 | T | T | T |
| 0.9149768872287538 | 0.1636208010458304 | 0.3495855738028268 | T | T | T |
| 0.9545099696828743 | 0.3957999996524748 | 0.1866900003632566 | F | F | F |
| 0.4545100164061751 | 0.8957999666520209 | 0.1866900003632566 | F | F | F |
| 0.6410080784761547 | 0.7846100858559524 | 0.2654192364632593 | T | T | T |
| 0.1429449206925071 | 0.2860479457576375 | 0.2732624893589488 | T | T | T |
| 0.4545100164061751 | 0.1542000069403500 | 0.1726800107755011 | F | F | F |
| 0.9545099696828743 | 0.6542000234215450 | 0.1726800107755011 | F | F | F |
| 0.1454900069574379 | 0.7638599674827660 | 0.1037499962351802 | F | F | F |
| 0.6454899836251471 | 0.2638599840124058 | 0.1037499962351802 | F | F | F |
| 0.1903399943208370 | 0.2862900056299651 | 0.1125700076069052 | F | F | F |
| 0.6903399592441062 | 0.7862899726295041 | 0.1125700076069052 | F | F | F |
| 0.9096599473797582 | 0.8817800337476598 | 0.1725899975309915 | F | F | F |
| 0.4096599940051888 | 0.3817800007264367 | 0.1725899975309915 | F | F | F |
| 0.4096599940051888 | 0.6682199563951130 | 0.1867800022190593 | F | F | F |
| 0.9096599473797582 | 0.1682200058663881 | 0.1867800022190593 | F | F | F |
| 0.6899116859569858 | 0.2677998765679561 | 0.2540001599415262 | T | T | T |

|                    |                    |                    |   |   |   |
|--------------------|--------------------|--------------------|---|---|---|
| 0.1871510444749234 | 0.7608151777947043 | 0.2536585642145610 | T | T | T |
| 0.4180599929386020 | 0.7820899854364924 | 0.0870100033908230 | F | F | F |
| 0.9180600395836080 | 0.2820900184369464 | 0.0870100033908230 | F | F | F |
| 0.9172159423003734 | 0.7651628105958324 | 0.2864933424538165 | T | T | T |
| 0.4187667655922311 | 0.2655461546273301 | 0.2807981072502699 | T | T | T |
| 0.6819400070927131 | 0.4224300249338668 | 0.1752299989317905 | F | F | F |
| 0.1819400070339938 | 0.9224299589225708 | 0.1752299989317905 | F | F | F |
| 0.1819400070339938 | 0.1275800053274239 | 0.1841400008182603 | F | F | F |
| 0.6819400070927131 | 0.6275799970331946 | 0.1841400008182603 | F | F | F |
| 0.6326846641890498 | 0.3899703444384812 | 0.3533767140700235 | T | T | T |
| 0.1357557689902151 | 0.8960830901994683 | 0.3519405278489884 | T | T | T |
| 0.9570284107418914 | 0.0117418180702700 | 0.2705493089384490 | T | T | T |
| 0.4541081644925526 | 0.5145852028637421 | 0.2718225839291577 | T | T | T |
| 0.1511622596579016 | 0.6502227783789465 | 0.3651337194438540 | T | T | T |
| 0.6412674742956455 | 0.1505916854402187 | 0.3630204534147978 | T | T | T |
| 0.4545100164061751 | 0.5361400390910305 | 0.0984700048222891 | F | F | F |
| 0.9545099696828743 | 0.0361399978344039 | 0.0984700048222891 | F | F | F |
| 0.4096599940051888 | 0.0137099999541945 | 0.0896599967858833 | F | F | F |
| 0.9096599473797582 | 0.5137100339442853 | 0.0896599967858833 | F | F | F |
| 0.7093155224358014 | 0.9187677242536623 | 0.3609680501023647 | T | T | T |
| 0.3101371769922849 | 0.3955862595316617 | 0.3890606716180045 | T | T | T |
| 0.2005512131055127 | 0.1307449981562456 | 0.3576748074378102 | T | T | T |
| 0.6938444992393613 | 0.6356445241718731 | 0.3502863074058737 | T | T | T |
| 0.8992810551980526 | 0.5364598300363710 | 0.2828551093233145 | T | T | T |
| 0.4068993325713208 | 0.0378090189390363 | 0.2784320897288879 | T | T | T |
| 0.7084451464432107 | 0.7727381590649216 | 0.4557073644161278 | T | T | T |
| 0.5344514515217327 | 0.7579969216008493 | 0.5195009631769238 | T | T | T |
| 0.7999999999960821 | 0.7581899815576136 | 0.1902599906343454 | F | F | F |
| 0.3000000233283728 | 0.7918100085159523 | 0.1691199954394378 | F | F | F |
| 0.3000000233283728 | 0.2581899980872535 | 0.1902599906343454 | F | F | F |
| 0.7999999999960821 | 0.2918100085747710 | 0.1691199954394378 | F | F | F |
| 0.8336300498524380 | 0.0250000012150693 | 0.1796899987074170 | F | F | F |
| 0.7685819996010608 | 0.2668095822791727 | 0.3505718230308545 | T | T | T |
| 0.3336300032074320 | 0.5249999785261750 | 0.1796899987074170 | F | F | F |
| 0.2636681074332401 | 0.7746678541491292 | 0.3507835669166184 | T | T | T |
| 0.5471224437059377 | 0.9169761938565628 | 0.2815695188418630 | T | T | T |
| 0.5500000000156575 | 0.1331900063373723 | 0.0905399972845800 | F | F | F |
| 0.0317158367265478 | 0.4114658773189674 | 0.2790899816588635 | T | T | T |
| 0.0499999999569383 | 0.6331899898077324 | 0.0905399972845800 | F | F | F |
| 0.7932187301968057 | 0.0456452074230000 | 0.3402294116109559 | T | T | T |
| 0.2810647119834613 | 0.9985975457125278 | 0.3534907144064690 | T | T | T |
| 0.2975070727399043 | 0.5420365817000601 | 0.3497978778753890 | T | T | T |
| 0.7884794696226081 | 0.4986282620925166 | 0.3674508804970316 | T | T | T |
| 0.7610521359582236 | 0.7805636710939936 | 0.3504415800088125 | T | T | T |

|                    |                    |                    |   |   |   |
|--------------------|--------------------|--------------------|---|---|---|
| 0.8336300498524380 | 0.5249999785261750 | 0.1796899987074170 | F | F | F |
| 0.2754377895131555 | 0.2640564419915208 | 0.3516373708933997 | T | T | T |
| 0.3336300032074320 | 0.0250000012150693 | 0.1796899987074170 | F | F | F |
| 0.0479531539897167 | 0.8809048776274295 | 0.2581669360794123 | T | T | T |
| 0.049999999569383  | 0.1668100002848689 | 0.1116700004375772 | F | F | F |
| 0.5473579900062759 | 0.3828024824630560 | 0.2569778027336724 | T | T | T |
| 0.550000000156575  | 0.6668099508135938 | 0.1116700004375772 | F | F | F |
| 0.550000000156575  | 0.4000000197871287 | 0.1011099948343812 | F | F | F |
| 0.0468555905633110 | 0.1478123770757236 | 0.2712659323117492 | T | T | T |
| 0.550000000156575  | 0.8999999537758328 | 0.1011099948343812 | F | F | F |
| 0.0490082124930851 | 0.6458537032697436 | 0.2726703112033704 | T | T | T |
| 0.049999999569383  | 0.4000000197871287 | 0.1011099948343812 | F | F | F |
| 0.049999999569383  | 0.8999999537758328 | 0.1011099948343812 | F | F | F |
| 0.5494144296320584 | 0.6488593970811110 | 0.2663093052134400 | T | T | T |
| 0.5524206088070542 | 0.1495176726751879 | 0.2681882293994633 | T | T | T |
| 0.3544126240238654 | 0.5489261438488029 | 0.4866773490777234 | T | T | T |
| 0.4940804256264855 | 0.4391713764940803 | 0.4214323374341973 | T | T | T |
| 0.5443367553891960 | 0.6186985041671349 | 0.4249535012881367 | T | T | T |
| 0.6859158858319816 | 0.5051896010227850 | 0.4838740142923754 | T | T | T |
| 0.6048548279042194 | 0.7301125326931839 | 0.4688002236962490 | T | T | T |
| 0.5780359172544038 | 0.8134092677367022 | 0.5368141917226978 | T | T | T |

CONTCAR cis-cooh-pd2pt2

1.000000000000000

10.2175998688000007 0.0000000000000000 0.0000000000000000

0.0000000000000000 14.4497995377000006 0.0000000000000000

0.0000000000000000 0.0000000000000000 20.9857006073000001

| O  | In | Pd | Pt | C | H |
|----|----|----|----|---|---|
| 50 | 32 | 2  | 2  | 1 | 1 |

Selective dynamics

Direct

|                    |                    |                    |   |   |   |
|--------------------|--------------------|--------------------|---|---|---|
| 0.1819400070339938 | 0.5179200200303384 | 0.1152000000018631 | F | F | F |
| 0.6819400070927131 | 0.0179200014037875 | 0.1152000000018631 | F | F | F |
| 0.6791755109424287 | 0.0312813900176963 | 0.2521421713342420 | T | T | T |
| 0.1790867407799652 | 0.5181796016456275 | 0.2637548039374664 | T | T | T |
| 0.9125482059337031 | 0.3777513568753150 | 0.3593699436282947 | T | T | T |
| 0.4081201596056232 | 0.8819346807886248 | 0.3588419563972138 | T | T | T |
| 0.4249145016382059 | 0.6719431749628484 | 0.3518286682497873 | T | T | T |
| 0.9146704815977316 | 0.1640053468381382 | 0.3492611319411481 | T | T | T |
| 0.9545099696828743 | 0.395799996524748  | 0.1866900003632566 | F | F | F |
| 0.4545100164061751 | 0.8957999666520209 | 0.1866900003632566 | F | F | F |
| 0.6410267880282206 | 0.7847683884345145 | 0.2652896697691247 | T | T | T |
| 0.1424195137814550 | 0.2861553344027286 | 0.2722006610579655 | T | T | T |

|                    |                    |                    |   |   |   |
|--------------------|--------------------|--------------------|---|---|---|
| 0.4545100164061751 | 0.1542000069403500 | 0.1726800107755011 | F | F | F |
| 0.9545099696828743 | 0.6542000234215450 | 0.1726800107755011 | F | F | F |
| 0.1454900069574379 | 0.7638599674827660 | 0.1037499962351802 | F | F | F |
| 0.6454899836251471 | 0.2638599840124058 | 0.1037499962351802 | F | F | F |
| 0.1903399943208370 | 0.2862900056299651 | 0.1125700076069052 | F | F | F |
| 0.6903399592441062 | 0.7862899726295041 | 0.1125700076069052 | F | F | F |
| 0.9096599473797582 | 0.8817800337476598 | 0.1725899975309915 | F | F | F |
| 0.4096599940051888 | 0.3817800007264367 | 0.1725899975309915 | F | F | F |
| 0.4096599940051888 | 0.6682199563951130 | 0.1867800022190593 | F | F | F |
| 0.9096599473797582 | 0.1682200058663881 | 0.1867800022190593 | F | F | F |
| 0.6892184325948492 | 0.2668664337898790 | 0.2534347548918063 | T | T | T |
| 0.1870754943351827 | 0.7609440236369238 | 0.2536572516385434 | T | T | T |
| 0.4180599929386020 | 0.7820899854364924 | 0.0870100033908230 | F | F | F |
| 0.9180600395836080 | 0.2820900184369464 | 0.0870100033908230 | F | F | F |
| 0.9172514070497115 | 0.7651745764902955 | 0.2864189212710784 | T | T | T |
| 0.4179149001839235 | 0.2659025619989492 | 0.2811767728915981 | T | T | T |
| 0.6819400070927131 | 0.4224300249338668 | 0.1752299989317905 | F | F | F |
| 0.1819400070339938 | 0.9224299589225708 | 0.1752299989317905 | F | F | F |
| 0.1819400070339938 | 0.1275800053274239 | 0.1841400008182603 | F | F | F |
| 0.6819400070927131 | 0.6275799970331946 | 0.1841400008182603 | F | F | F |
| 0.6361981463773603 | 0.3911911233026473 | 0.3520053245111043 | T | T | T |
| 0.1357707738395106 | 0.8960735407739620 | 0.3519668242269560 | T | T | T |
| 0.9567737355144814 | 0.0117137922568915 | 0.2705549476455218 | T | T | T |
| 0.4542983606900535 | 0.5145168972817373 | 0.2722095354475300 | T | T | T |
| 0.1518391853517613 | 0.6501007444275828 | 0.3651281286270773 | T | T | T |
| 0.6415995118533928 | 0.1510845535834804 | 0.3631137897074481 | T | T | T |
| 0.4545100164061751 | 0.5361400390910305 | 0.0984700048222891 | F | F | F |
| 0.9545099696828743 | 0.0361399978344039 | 0.0984700048222891 | F | F | F |
| 0.4096599940051888 | 0.0137099999541945 | 0.0896599967858833 | F | F | F |
| 0.9096599473797582 | 0.5137100339442853 | 0.0896599967858833 | F | F | F |
| 0.7095608426936764 | 0.9187029280569234 | 0.3613568823867084 | T | T | T |
| 0.3059560747346879 | 0.3964561115843495 | 0.3897474661705331 | T | T | T |
| 0.2003211042104454 | 0.1315036003847325 | 0.3569623875084105 | T | T | T |
| 0.6941781354720860 | 0.6360146808132470 | 0.3502913275340802 | T | T | T |
| 0.8994581988360579 | 0.5368039932847424 | 0.2827828097351457 | T | T | T |
| 0.4067502080081624 | 0.0376654459303936 | 0.2784238785622577 | T | T | T |
| 0.7103337069094593 | 0.7705260999136030 | 0.4564504322988014 | T | T | T |
| 0.5406513448040400 | 0.7509368507526872 | 0.5226330599298592 | T | T | T |
| 0.799999999960821  | 0.7581899815576136 | 0.1902599906343454 | F | F | F |
| 0.3000000233283728 | 0.7918100085159523 | 0.1691199954394378 | F | F | F |
| 0.3000000233283728 | 0.2581899980872535 | 0.1902599906343454 | F | F | F |
| 0.799999999960821  | 0.2918100085747710 | 0.1691199954394378 | F | F | F |
| 0.8336300498524380 | 0.0250000012150693 | 0.1796899987074170 | F | F | F |
| 0.7689221433420030 | 0.2677480195328670 | 0.3498800794010108 | T | T | T |

|                    |                    |                    |   |   |   |
|--------------------|--------------------|--------------------|---|---|---|
| 0.3336300032074320 | 0.5249999785261750 | 0.1796899987074170 | F | F | F |
| 0.2639269830271687 | 0.7746050751525217 | 0.3507366497774527 | T | T | T |
| 0.5470410587957275 | 0.9170073387081885 | 0.2816642256892194 | T | T | T |
| 0.5500000000156575 | 0.1331900063373723 | 0.0905399972845800 | F | F | F |
| 0.0322287443090801 | 0.4119204108838161 | 0.2789401634834974 | T | T | T |
| 0.0499999999569383 | 0.6331899898077324 | 0.0905399972845800 | F | F | F |
| 0.7927828173311369 | 0.0459865593085951 | 0.3402646007618131 | T | T | T |
| 0.2803579722306537 | 0.9990078969778082 | 0.3533111314304307 | T | T | T |
| 0.2971398970750840 | 0.5407135070636713 | 0.3499364073811577 | T | T | T |
| 0.7889398254930242 | 0.4982253984980787 | 0.3674930970400041 | T | T | T |
| 0.7610905327988178 | 0.7807320770593833 | 0.3504262317508093 | T | T | T |
| 0.8336300498524380 | 0.5249999785261750 | 0.1796899987074170 | F | F | F |
| 0.2725306900898232 | 0.2661267075898905 | 0.3515765500706607 | T | T | T |
| 0.3336300032074320 | 0.0250000012150693 | 0.1796899987074170 | F | F | F |
| 0.0478612084029209 | 0.8809337539173256 | 0.2582449316692248 | T | T | T |
| 0.0499999999569383 | 0.1668100002848689 | 0.1116700004375772 | F | F | F |
| 0.5475981119173667 | 0.3826575372081749 | 0.2571306991181288 | T | T | T |
| 0.5500000000156575 | 0.6668099508135938 | 0.1116700004375772 | F | F | F |
| 0.5500000000156575 | 0.4000000197871287 | 0.1011099948343812 | F | F | F |
| 0.0468886633978087 | 0.1478117147249591 | 0.2712404239163604 | T | T | T |
| 0.5500000000156575 | 0.8999999537758328 | 0.1011099948343812 | F | F | F |
| 0.0492655470447971 | 0.6458634241415950 | 0.2728007018897713 | T | T | T |
| 0.0499999999569383 | 0.4000000197871287 | 0.1011099948343812 | F | F | F |
| 0.0499999999569383 | 0.8999999537758328 | 0.1011099948343812 | F | F | F |
| 0.5496520141511709 | 0.6487535783982779 | 0.2662195267640826 | T | T | T |
| 0.5513486470993030 | 0.1496714280056395 | 0.2686903918539869 | T | T | T |
| 0.3548855330340785 | 0.5483835872098268 | 0.4846235530099037 | T | T | T |
| 0.4950525251277185 | 0.4366289474639728 | 0.4211325435955189 | T | T | T |
| 0.5447010103263779 | 0.6185009408410238 | 0.4241433181082712 | T | T | T |
| 0.6857895619205223 | 0.5059403128051727 | 0.4839234219945965 | T | T | T |
| 0.6085722060712797 | 0.7265484945187737 | 0.4702901142800897 | T | T | T |
| 0.5844146165099957 | 0.8057406290754727 | 0.5407550726734414 | T | T | T |

CONTCAR(2) cis- cooh-pd3pt

1.0000000000000000

10.2175998688000007 0.0000000000000000 0.0000000000000000

0.0000000000000000 14.4497995377000006 0.0000000000000000

0.0000000000000000 0.0000000000000000 20.9857006073000001

| O  | In | Pd | Pt | C | H |
|----|----|----|----|---|---|
| 50 | 32 | 3  | 1  | 1 | 1 |

Selective dynamics

Direct

|                    |                    |                    |   |   |   |
|--------------------|--------------------|--------------------|---|---|---|
| 0.1819400070339938 | 0.5179200200303384 | 0.1152000000018631 | F | F | F |
|--------------------|--------------------|--------------------|---|---|---|

|                    |                    |                    |   |   |   |
|--------------------|--------------------|--------------------|---|---|---|
| 0.6819400070927131 | 0.0179200014037875 | 0.1152000000018631 | F | F | F |
| 0.6792646831016640 | 0.0311970125886560 | 0.2522241297618351 | T | T | T |
| 0.1794189376192818 | 0.5183827764781128 | 0.2638238368443666 | T | T | T |
| 0.9118377082909177 | 0.3785784811892015 | 0.3592016991274036 | T | T | T |
| 0.4084860519336431 | 0.8826294450061667 | 0.3589357458417552 | T | T | T |
| 0.4219412956970388 | 0.6726360654429797 | 0.3504334657803625 | T | T | T |
| 0.9148941553750447 | 0.1640697741309154 | 0.3492351938170870 | T | T | T |
| 0.9545099696828743 | 0.3957999996524748 | 0.1866900003632566 | F | F | F |
| 0.4545100164061751 | 0.8957999666520209 | 0.1866900003632566 | F | F | F |
| 0.6406740373933175 | 0.7852098168280577 | 0.2648858240889496 | T | T | T |
| 0.1425929510155086 | 0.2863280176877296 | 0.2723827209687144 | T | T | T |
| 0.4545100164061751 | 0.1542000069403500 | 0.1726800107755011 | F | F | F |
| 0.9545099696828743 | 0.6542000234215450 | 0.1726800107755011 | F | F | F |
| 0.1454900069574379 | 0.7638599674827660 | 0.1037499962351802 | F | F | F |
| 0.6454899836251471 | 0.2638599840124058 | 0.1037499962351802 | F | F | F |
| 0.1903399943208370 | 0.2862900056299651 | 0.1125700076069052 | F | F | F |
| 0.6903399592441062 | 0.7862899726295041 | 0.1125700076069052 | F | F | F |
| 0.9096599473797582 | 0.8817800337476598 | 0.1725899975309915 | F | F | F |
| 0.4096599940051888 | 0.3817800007264367 | 0.1725899975309915 | F | F | F |
| 0.4096599940051888 | 0.6682199563951130 | 0.1867800022190593 | F | F | F |
| 0.9096599473797582 | 0.1682200058663881 | 0.1867800022190593 | F | F | F |
| 0.6893321890388719 | 0.2669437172158950 | 0.2533514614590047 | T | T | T |
| 0.1863007559513505 | 0.7611324434422571 | 0.2532565520302796 | T | T | T |
| 0.4180599929386020 | 0.7820899854364924 | 0.0870100033908230 | F | F | F |
| 0.9180600395836080 | 0.2820900184369464 | 0.0870100033908230 | F | F | F |
| 0.9168055477764057 | 0.7655279808587565 | 0.2861701413696451 | T | T | T |
| 0.4180897774107208 | 0.2659494047671060 | 0.2811366612099846 | T | T | T |
| 0.6819400070927131 | 0.4224300249338668 | 0.1752299989317905 | F | F | F |
| 0.1819400070339938 | 0.9224299589225708 | 0.1752299989317905 | F | F | F |
| 0.1819400070339938 | 0.1275800053274239 | 0.1841400008182603 | F | F | F |
| 0.6819400070927131 | 0.6275799970331946 | 0.1841400008182603 | F | F | F |
| 0.6362264828471069 | 0.3912810783804517 | 0.3516915427134535 | T | T | T |
| 0.1363888189359059 | 0.8963731436501305 | 0.3517277599949082 | T | T | T |
| 0.9570293713461737 | 0.0119395157664073 | 0.2704125614838944 | T | T | T |
| 0.4544298217841529 | 0.5143591959731140 | 0.2718270444339339 | T | T | T |
| 0.1495985471575452 | 0.6505327840471580 | 0.3652885268619031 | T | T | T |
| 0.6422300900908411 | 0.1511744146653413 | 0.3630548296269751 | T | T | T |
| 0.4545100164061751 | 0.5361400390910305 | 0.0984700048222891 | F | F | F |
| 0.9545099696828743 | 0.0361399978344039 | 0.0984700048222891 | F | F | F |
| 0.4096599940051888 | 0.0137099999541945 | 0.0896599967858833 | F | F | F |
| 0.9096599473797582 | 0.5137100339442853 | 0.0896599967858833 | F | F | F |
| 0.7107176848204020 | 0.9179155382682325 | 0.3614015100785295 | T | T | T |
| 0.3052619291629668 | 0.3967541566506014 | 0.3900399886270307 | T | T | T |
| 0.2009474106873341 | 0.1317522196590986 | 0.3569440270099449 | T | T | T |

|                    |                    |                    |   |   |   |
|--------------------|--------------------|--------------------|---|---|---|
| 0.6961937552432147 | 0.6360937395341182 | 0.3486220128274908 | T | T | T |
| 0.9001884018702739 | 0.5364533067448463 | 0.2822278387105968 | T | T | T |
| 0.4069644909727472 | 0.0379623063573149 | 0.2781981474689559 | T | T | T |
| 0.7076143358717317 | 0.7693568615725326 | 0.4583489600449582 | T | T | T |
| 0.5429782026674843 | 0.7438171200591057 | 0.5270491623509557 | T | T | T |
| 0.799999999960821  | 0.7581899815576136 | 0.1902599906343454 | F | F | F |
| 0.3000000233283728 | 0.7918100085159523 | 0.1691199954394378 | F | F | F |
| 0.3000000233283728 | 0.2581899980872535 | 0.1902599906343454 | F | F | F |
| 0.799999999960821  | 0.2918100085747710 | 0.1691199954394378 | F | F | F |
| 0.8336300498524380 | 0.0250000012150693 | 0.1796899987074170 | F | F | F |
| 0.7694314345314197 | 0.2681712904831102 | 0.3498688671207404 | T | T | T |
| 0.3336300032074320 | 0.5249999785261750 | 0.1796899987074170 | F | F | F |
| 0.2640674594487891 | 0.7745476812933134 | 0.3502024577572129 | T | T | T |
| 0.5470715280899228 | 0.9170037922743788 | 0.2817404274675681 | T | T | T |
| 0.5500000000156575 | 0.1331900063373723 | 0.0905399972845800 | F | F | F |
| 0.0323702980784688 | 0.4122825540434931 | 0.2790058383163512 | T | T | T |
| 0.0499999999569383 | 0.6331899898077324 | 0.0905399972845800 | F | F | F |
| 0.7931213368221250 | 0.0457748899878965 | 0.3402941261056185 | T | T | T |
| 0.2810148100591121 | 0.9992964633121062 | 0.3532400564279143 | T | T | T |
| 0.2978001967936876 | 0.5422564244482260 | 0.3498656366741741 | T | T | T |
| 0.7879609071766538 | 0.4997260694356456 | 0.3670192672388950 | T | T | T |
| 0.7598839012722820 | 0.7795112033206024 | 0.3503445421805651 | T | T | T |
| 0.8336300498524380 | 0.5249999785261750 | 0.1796899987074170 | F | F | F |
| 0.2732207140506304 | 0.2664959033673995 | 0.3517286124668786 | T | T | T |
| 0.3336300032074320 | 0.0250000012150693 | 0.1796899987074170 | F | F | F |
| 0.0473476677067453 | 0.8808490684354879 | 0.2583778699187320 | T | T | T |
| 0.0499999999569383 | 0.1668100002848689 | 0.1116700004375772 | F | F | F |
| 0.5476522376199284 | 0.3829780794569402 | 0.2571488620117961 | T | T | T |
| 0.5500000000156575 | 0.6668099508135938 | 0.1116700004375772 | F | F | F |
| 0.5500000000156575 | 0.4000000197871287 | 0.1011099948343812 | F | F | F |
| 0.0473319457506207 | 0.1479802613812424 | 0.2713249274151295 | T | T | T |
| 0.5500000000156575 | 0.8999999537758328 | 0.1011099948343812 | F | F | F |
| 0.0486882233752510 | 0.6460065469040401 | 0.2730480288440376 | T | T | T |
| 0.0499999999569383 | 0.4000000197871287 | 0.1011099948343812 | F | F | F |
| 0.0499999999569383 | 0.8999999537758328 | 0.1011099948343812 | F | F | F |
| 0.5491627672404391 | 0.6492127062206379 | 0.2667776331629383 | T | T | T |
| 0.5518000255792685 | 0.1498018594882282 | 0.2687265371800365 | T | T | T |
| 0.3530039983451161 | 0.5460644698464279 | 0.4832540684935793 | T | T | T |
| 0.4952815136131719 | 0.4357024201115181 | 0.4203933232936947 | T | T | T |
| 0.5437906395953647 | 0.6197657792005344 | 0.4237047756392514 | T | T | T |
| 0.6842307742898939 | 0.5060823099387264 | 0.4833344216056190 | T | T | T |
| 0.6088496230206815 | 0.7237445413515076 | 0.4733590064376756 | T | T | T |
| 0.5851896434110344 | 0.7984397986738330 | 0.5465017672432069 | T | T | T |



CONTCAR\2) cis- cooh-pd4

1.0000000000000000

|                     |                     |                     |
|---------------------|---------------------|---------------------|
| 10.2175998688000007 | 0.0000000000000000  | 0.0000000000000000  |
| 0.0000000000000000  | 14.4497995377000006 | 0.0000000000000000  |
| 0.0000000000000000  | 0.0000000000000000  | 20.9857006073000001 |

|    |    |    |   |   |
|----|----|----|---|---|
| O  | In | Pd | C | H |
| 50 | 32 | 4  | 1 | 1 |

Selective dynamics

Direct

|                    |                    |                    |   |   |   |
|--------------------|--------------------|--------------------|---|---|---|
| 0.1819400070339938 | 0.5179200200303384 | 0.1152000000018631 | F | F | F |
| 0.6819400070927131 | 0.0179200014037875 | 0.1152000000018631 | F | F | F |
| 0.6790500778130806 | 0.0310778401659420 | 0.2522666374831815 | T | T | T |
| 0.1797455764450930 | 0.5183871981502648 | 0.2641839438687157 | T | T | T |
| 0.9112425247165774 | 0.3792462429876480 | 0.3598169012118078 | T | T | T |
| 0.4081519912832405 | 0.8827763883738697 | 0.3588152614361988 | T | T | T |
| 0.4215379419964265 | 0.6726604380191219 | 0.3488261881940318 | T | T | T |
| 0.9147204130459201 | 0.1642011858090200 | 0.3492085374781624 | T | T | T |
| 0.9545099696828743 | 0.395799996524748  | 0.1866900003632566 | F | F | F |
| 0.4545100164061751 | 0.8957999666520209 | 0.1866900003632566 | F | F | F |
| 0.6417522332757457 | 0.7856801351374543 | 0.2650721111124525 | T | T | T |
| 0.1420649651683945 | 0.2865453939304743 | 0.2725169118981157 | T | T | T |
| 0.4545100164061751 | 0.1542000069403500 | 0.1726800107755011 | F | F | F |
| 0.9545099696828743 | 0.6542000234215450 | 0.1726800107755011 | F | F | F |
| 0.1454900069574379 | 0.7638599674827660 | 0.1037499962351802 | F | F | F |
| 0.6454899836251471 | 0.2638599840124058 | 0.1037499962351802 | F | F | F |
| 0.1903399943208370 | 0.2862900056299651 | 0.1125700076069052 | F | F | F |
| 0.6903399592441062 | 0.7862899726295041 | 0.1125700076069052 | F | F | F |
| 0.9096599473797582 | 0.8817800337476598 | 0.1725899975309915 | F | F | F |
| 0.4096599940051888 | 0.3817800007264367 | 0.1725899975309915 | F | F | F |
| 0.4096599940051888 | 0.6682199563951130 | 0.1867800022190593 | F | F | F |
| 0.9096599473797582 | 0.1682200058663881 | 0.1867800022190593 | F | F | F |
| 0.6889973918420651 | 0.2668935106843904 | 0.2533210509155026 | T | T | T |
| 0.1862000112834821 | 0.7611754028326487 | 0.2530684389658333 | T | T | T |
| 0.4180599929386020 | 0.7820899854364924 | 0.0870100033908230 | F | F | F |
| 0.9180600395836080 | 0.2820900184369464 | 0.0870100033908230 | F | F | F |
| 0.9174628323874856 | 0.7654961835854053 | 0.2860519634520315 | T | T | T |
| 0.4177181230789060 | 0.2661033864262379 | 0.2811045880103435 | T | T | T |
| 0.6819400070927131 | 0.4224300249338668 | 0.1752299989317905 | F | F | F |
| 0.1819400070339938 | 0.9224299589225708 | 0.1752299989317905 | F | F | F |
| 0.1819400070339938 | 0.1275800053274239 | 0.1841400008182603 | F | F | F |
| 0.6819400070927131 | 0.6275799970331946 | 0.1841400008182603 | F | F | F |
| 0.6365527003629836 | 0.3911298801979868 | 0.3518680602752511 | T | T | T |
| 0.1362539623298318 | 0.8962314010811525 | 0.3516616854401704 | T | T | T |

|                    |                    |                    |   |   |   |
|--------------------|--------------------|--------------------|---|---|---|
| 0.9568557133436570 | 0.0119445068345101 | 0.2704816630739089 | T | T | T |
| 0.4550953761647492 | 0.5142402981673015 | 0.2714239606211351 | T | T | T |
| 0.1497169884154843 | 0.6503774545568817 | 0.3654190941368327 | T | T | T |
| 0.6419279984997601 | 0.1513253000405541 | 0.3631423768879216 | T | T | T |
| 0.4545100164061751 | 0.5361400390910305 | 0.0984700048222891 | F | F | F |
| 0.9545099696828743 | 0.0361399978344039 | 0.0984700048222891 | F | F | F |
| 0.4096599940051888 | 0.0137099999541945 | 0.0896599967858833 | F | F | F |
| 0.9096599473797582 | 0.5137100339442853 | 0.0896599967858833 | F | F | F |
| 0.7107077444372365 | 0.9182165172376173 | 0.3621288349501199 | T | T | T |
| 0.3051855335726401 | 0.3973520574967040 | 0.3906927673377183 | T | T | T |
| 0.2010404545671634 | 0.1321262767746276 | 0.3567570529992139 | T | T | T |
| 0.6966828001415735 | 0.6368470963416399 | 0.3484700473271829 | T | T | T |
| 0.8995502621865725 | 0.5364437039822505 | 0.2821504656115295 | T | T | T |
| 0.4066395315174844 | 0.0379165069984424 | 0.2782080781161298 | T | T | T |
| 0.7248229019429360 | 0.7647644334442987 | 0.4588445053055068 | T | T | T |
| 0.5614408251244143 | 0.7441046183297360 | 0.5287288669383727 | T | T | T |
| 0.799999999960821  | 0.7581899815576136 | 0.1902599906343454 | F | F | F |
| 0.3000000233283728 | 0.7918100085159523 | 0.1691199954394378 | F | F | F |
| 0.3000000233283728 | 0.2581899980872535 | 0.1902599906343454 | F | F | F |
| 0.799999999960821  | 0.2918100085747710 | 0.1691199954394378 | F | F | F |
| 0.8336300498524380 | 0.0250000012150693 | 0.1796899987074170 | F | F | F |
| 0.7693558948263188 | 0.2683029489021465 | 0.3498011578736495 | T | T | T |
| 0.3336300032074320 | 0.5249999785261750 | 0.1796899987074170 | F | F | F |
| 0.2643536057307401 | 0.7741915877645482 | 0.3500724131621880 | T | T | T |
| 0.5469520956678480 | 0.9168753942210373 | 0.2819220948826526 | T | T | T |
| 0.5500000000156575 | 0.1331900063373723 | 0.0905399972845800 | F | F | F |
| 0.0322421015825540 | 0.4126454475045662 | 0.2793241172848298 | T | T | T |
| 0.0499999999569383 | 0.6331899898077324 | 0.0905399972845800 | F | F | F |
| 0.7928564731420948 | 0.0458828903966264 | 0.3403431154837193 | T | T | T |
| 0.2804110743656381 | 0.9993814403230843 | 0.3532642904635992 | T | T | T |
| 0.2992127671855727 | 0.5424173176067129 | 0.3505781498570784 | T | T | T |
| 0.7859124193205318 | 0.5000444277357801 | 0.3669442060741872 | T | T | T |
| 0.7618773587677197 | 0.7802179523146435 | 0.3505927687108610 | T | T | T |
| 0.8336300498524380 | 0.5249999785261750 | 0.1796899987074170 | F | F | F |
| 0.2729605938681061 | 0.2673741513057806 | 0.3519642268544914 | T | T | T |
| 0.3336300032074320 | 0.0250000012150693 | 0.1796899987074170 | F | F | F |
| 0.0475799079667922 | 0.8808408497075817 | 0.2583640543635397 | T | T | T |
| 0.0499999999569383 | 0.1668100002848689 | 0.1116700004375772 | F | F | F |
| 0.5474580833406435 | 0.3829806719524953 | 0.2572119504505253 | T | T | T |
| 0.5500000000156575 | 0.6668099508135938 | 0.1116700004375772 | F | F | F |
| 0.5500000000156575 | 0.4000000197871287 | 0.1011099948343812 | F | F | F |
| 0.0475314542928658 | 0.1480027440167149 | 0.2714997795624257 | T | T | T |
| 0.5500000000156575 | 0.8999999537758328 | 0.1011099948343812 | F | F | F |
| 0.0491615500112985 | 0.6457713490347530 | 0.2732407724969832 | T | T | T |

|                    |                    |                    |   |   |   |
|--------------------|--------------------|--------------------|---|---|---|
| 0.049999999569383  | 0.4000000197871287 | 0.1011099948343812 | F | F | F |
| 0.049999999569383  | 0.8999999537758328 | 0.1011099948343812 | F | F | F |
| 0.5489663776761162 | 0.6496984000711095 | 0.2666001528442195 | T | T | T |
| 0.5511794952699347 | 0.1497391838226534 | 0.2689705812326793 | T | T | T |
| 0.3609029436211770 | 0.5509995072486831 | 0.4851595945376204 | T | T | T |
| 0.4971412267963018 | 0.4386641685308561 | 0.4202728771054041 | T | T | T |
| 0.5484507091676463 | 0.6225062363205325 | 0.4234491752061302 | T | T | T |
| 0.6869484407466544 | 0.5076807813438151 | 0.4854294916943687 | T | T | T |
| 0.6247925230720170 | 0.7205237339433950 | 0.4748371287439213 | T | T | T |
| 0.6044248840511699 | 0.8002409391538023 | 0.5455232478857326 | T | T | T |

Pt4 ts3

1.000000000000000

10.2175998688000007      0.0000000000000000      0.0000000000000000

0.0000000000000000      14.4497995377000006      0.0000000000000000

0.0000000000000000      0.0000000000000000      20.9857006073000001

|    |    |    |   |   |
|----|----|----|---|---|
| O  | In | Pt | C | H |
| 50 | 32 | 4  | 1 | 1 |

Selective dynamics

Direct

|                    |                    |                    |   |   |   |
|--------------------|--------------------|--------------------|---|---|---|
| 0.1819400070339938 | 0.5179200200303384 | 0.1152000000018631 | F | F | F |
| 0.6819400070927131 | 0.0179200014037875 | 0.1152000000018631 | F | F | F |
| 0.6804879854503199 | 0.0297978544360404 | 0.2527704978646241 | F | F | F |
| 0.1820716773659186 | 0.5184934719569014 | 0.2664396679774867 | F | F | F |
| 0.9106118695950016 | 0.3762719420434095 | 0.3582183839112858 | F | F | F |
| 0.4110058478259759 | 0.8839549497454868 | 0.3584263916122197 | F | F | F |
| 0.4336091057482534 | 0.6774755983189351 | 0.3502932649298600 | F | F | F |
| 0.9151732183978680 | 0.1629820748407127 | 0.3495449883633484 | F | F | F |
| 0.9545099696828743 | 0.3957999996526098 | 0.1866900003632566 | F | F | F |
| 0.4545100164061751 | 0.8957999666523193 | 0.1866900003632566 | F | F | F |
| 0.6422909360384779 | 0.7861620845651700 | 0.2641380998301557 | F | F | F |
| 0.1433232887342371 | 0.2852998732426570 | 0.2730158053732552 | F | F | F |
| 0.4545100164061751 | 0.1542000069403500 | 0.1726800107755011 | F | F | F |
| 0.9545099696828743 | 0.6542000234215450 | 0.1726800107755011 | F | F | F |
| 0.1454900069574379 | 0.7638599674830289 | 0.1037499962351802 | F | F | F |
| 0.6454899836251471 | 0.2638599840124058 | 0.1037499962351802 | F | F | F |
| 0.1903399943208370 | 0.2862900056299651 | 0.1125700076069052 | F | F | F |
| 0.6903399592441062 | 0.7862899726297670 | 0.1125700076069052 | F | F | F |
| 0.9096599473797582 | 0.8817800337479582 | 0.1725899975309915 | F | F | F |
| 0.4096599940051888 | 0.3817800007265717 | 0.1725899975309915 | F | F | F |
| 0.4096599940051888 | 0.6682199563951130 | 0.1867800022190593 | F | F | F |
| 0.9096599473797582 | 0.1682200058663881 | 0.1867800022190593 | F | F | F |
| 0.6898609878087569 | 0.2681791926548840 | 0.2539735717123435 | F | F | F |

|                    |                    |                    |   |   |   |
|--------------------|--------------------|--------------------|---|---|---|
| 0.1862459186191074 | 0.7612822714128455 | 0.2526514407707054 | F | F | F |
| 0.4180599929386020 | 0.7820899854367553 | 0.0870100033908230 | F | F | F |
| 0.9180600395836080 | 0.2820900184369464 | 0.0870100033908230 | F | F | F |
| 0.9152476420241129 | 0.7647141898670071 | 0.2874432899596115 | F | F | F |
| 0.4189977814067660 | 0.2639580377636221 | 0.2797188224380633 | F | F | F |
| 0.6819400070927131 | 0.4224300249340089 | 0.1752299989317905 | F | F | F |
| 0.1819400070339938 | 0.9224299589228693 | 0.1752299989317905 | F | F | F |
| 0.1819400070339938 | 0.1275800053274239 | 0.1841400008182603 | F | F | F |
| 0.6819400070927131 | 0.6275799970331946 | 0.1841400008182603 | F | F | F |
| 0.6326014678521616 | 0.3893700456555109 | 0.3545525024946699 | F | F | F |
| 0.1385587562504398 | 0.8959365710129461 | 0.3510907623832793 | F | F | F |
| 0.9567462608343789 | 0.0112916122366542 | 0.2702935023798076 | F | F | F |
| 0.4538780217472720 | 0.5142162872928182 | 0.2711553924809067 | F | F | F |
| 0.1558274026100861 | 0.6537362388406152 | 0.3645339586735830 | F | F | F |
| 0.6419860313312711 | 0.1499012838048870 | 0.3626127190435326 | F | F | F |
| 0.4545100164061751 | 0.5361400390910305 | 0.0984700048222891 | F | F | F |
| 0.9545099696828743 | 0.0361399978344039 | 0.0984700048222891 | F | F | F |
| 0.4096599940051888 | 0.0137099999541945 | 0.0896599967858833 | F | F | F |
| 0.9096599473797582 | 0.5137100339442853 | 0.0896599967858833 | F | F | F |
| 0.7104825967943498 | 0.9188489640776396 | 0.3643965969353005 | F | F | F |
| 0.3196410550566142 | 0.3885884061800198 | 0.3864762630065641 | F | F | F |
| 0.1984146418011079 | 0.1290063827128805 | 0.3567127174967624 | F | F | F |
| 0.6942011685021754 | 0.6282981053710159 | 0.3426021131850732 | F | F | F |
| 0.9014634796825831 | 0.5357120819597085 | 0.2827502859842852 | F | F | F |
| 0.4072334059797456 | 0.0385216081289741 | 0.2778501630931984 | F | F | F |
| 0.7542993320340585 | 0.6801078796922013 | 0.5418987765561809 | T | T | T |
| 0.5164309772817006 | 0.6942791444137342 | 0.5121006269669337 | T | T | T |
| 0.7999999999960821 | 0.7581899815578765 | 0.1902599906343454 | F | F | F |
| 0.3000000233283728 | 0.7918100085162152 | 0.1691199954394378 | F | F | F |
| 0.3000000233283728 | 0.2581899980872535 | 0.1902599906343454 | F | F | F |
| 0.7999999999960821 | 0.2918100085747710 | 0.1691199954394378 | F | F | F |
| 0.8336300498524380 | 0.0250000012150764 | 0.1796899987074170 | F | F | F |
| 0.7688936668364263 | 0.2663035942314451 | 0.3508283445477431 | F | F | F |
| 0.3336300032074320 | 0.5249999785261750 | 0.1796899987074170 | F | F | F |
| 0.2692247371362058 | 0.7754548654278750 | 0.3495477145060804 | F | F | F |
| 0.5469278726331339 | 0.9170079441640340 | 0.2814096548106022 | F | F | F |
| 0.5500000000156575 | 0.1331900063373723 | 0.0905399972845800 | F | F | F |
| 0.0348788434852310 | 0.4123600712046738 | 0.2791661908052916 | F | F | F |
| 0.0499999999569383 | 0.6331899898077324 | 0.0905399972845800 | F | F | F |
| 0.7942972706014544 | 0.0448973606231107 | 0.3413680084211705 | F | F | F |
| 0.2823115094754840 | 0.9987019828246417 | 0.3534203934238320 | F | F | F |
| 0.3061611321030142 | 0.5462737801259863 | 0.3538488764293888 | F | F | F |
| 0.7878788731473065 | 0.4957616393153330 | 0.3677926619119560 | F | F | F |
| 0.7563692706548011 | 0.7809812512814673 | 0.3509569635642293 | F | F | F |

|                    |                    |                    |   |   |   |
|--------------------|--------------------|--------------------|---|---|---|
| 0.8336300498524380 | 0.5249999785261750 | 0.1796899987074170 | F | F | F |
| 0.2765411427300677 | 0.2605473479320537 | 0.3514767882618131 | F | F | F |
| 0.3336300032074320 | 0.0250000012150764 | 0.1796899987074170 | F | F | F |
| 0.0469542277066637 | 0.8798553685403476 | 0.2590245420387305 | F | F | F |
| 0.049999999569383  | 0.1668100002848689 | 0.1116700004375772 | F | F | F |
| 0.5458954598301133 | 0.3828184356136646 | 0.2582190826075248 | F | F | F |
| 0.550000000156575  | 0.6668099508135938 | 0.1116700004375772 | F | F | F |
| 0.550000000156575  | 0.4000000197872637 | 0.1011099948343812 | F | F | F |
| 0.0467848945065938 | 0.1474565931883944 | 0.2714182098325821 | F | F | F |
| 0.550000000156575  | 0.8999999537761312 | 0.1011099948343812 | F | F | F |
| 0.0505312737096162 | 0.6455524593406707 | 0.2743035831448708 | F | F | F |
| 0.049999999569383  | 0.4000000197872637 | 0.1011099948343812 | F | F | F |
| 0.049999999569383  | 0.8999999537761312 | 0.1011099948343812 | F | F | F |
| 0.5473501331982291 | 0.6491433218602012 | 0.2647640264613784 | F | F | F |
| 0.5536106614551457 | 0.1491549445855398 | 0.2680478277648461 | F | F | F |
| 0.3344597675871910 | 0.5287804804891252 | 0.4835892383778102 | F | F | F |
| 0.4950309675418936 | 0.4369170586636812 | 0.4234722110736868 | F | F | F |
| 0.6788664740971839 | 0.5144928593226012 | 0.4841544706438583 | F | F | F |
| 0.5884107281182978 | 0.6688252955825860 | 0.4199889864878372 | F | F | F |
| 0.6729553796538568 | 0.6563672437053683 | 0.5036709042368486 | T | T | T |
| 0.4519814444390917 | 0.6385641740072857 | 0.5125575664087263 | T | T | T |

### Pdpt3 ts3

1.0000000000000000

10.2175998688000007 0.0000000000000000 0.0000000000000000

0.0000000000000000 14.4497995377000006 0.0000000000000000

0.0000000000000000 0.0000000000000000 20.9857006073000001

| O  | In | Pd | Pt | C | H |
|----|----|----|----|---|---|
| 50 | 32 | 1  | 3  | 1 | 1 |

### Selective dynamics

#### Direct

|                    |                    |                    |   |   |   |
|--------------------|--------------------|--------------------|---|---|---|
| 0.1819400070339938 | 0.5179200200303384 | 0.1152000000018631 | F | F | F |
| 0.6819400070927131 | 0.0179200014037875 | 0.1152000000018631 | F | F | F |
| 0.6798915616832133 | 0.0311763409605703 | 0.2524872630089803 | F | F | F |
| 0.1814034179431872 | 0.5182860524335808 | 0.2644184830079581 | F | F | F |
| 0.9073911535430668 | 0.3770309978948703 | 0.3587887715401834 | F | F | F |
| 0.4107221080102974 | 0.8844229264388730 | 0.3585370148437619 | F | F | F |
| 0.4316551693730446 | 0.6766385415077565 | 0.3489553886358863 | F | F | F |
| 0.9151878091725294 | 0.1641358188129445 | 0.3493129148252052 | F | F | F |
| 0.9545099696828743 | 0.395799996525388  | 0.1866900003632566 | F | F | F |
| 0.4545100164061751 | 0.8957999666521630 | 0.1866900003632566 | F | F | F |
| 0.6441443792884129 | 0.7868814087664902 | 0.2644468234808954 | F | F | F |
| 0.1414801803826151 | 0.2866587592643981 | 0.2728664624288371 | F | F | F |

|                    |                    |                    |   |   |   |
|--------------------|--------------------|--------------------|---|---|---|
| 0.4545100164061751 | 0.1542000069403500 | 0.1726800107755011 | F | F | F |
| 0.9545099696828743 | 0.6542000234215450 | 0.1726800107755011 | F | F | F |
| 0.1454900069574379 | 0.7638599674828939 | 0.1037499962351802 | F | F | F |
| 0.6454899836251471 | 0.2638599840124058 | 0.1037499962351802 | F | F | F |
| 0.1903399943208370 | 0.2862900056299651 | 0.1125700076069052 | F | F | F |
| 0.6903399592441062 | 0.7862899726296320 | 0.1125700076069052 | F | F | F |
| 0.9096599473797582 | 0.8817800337478019 | 0.1725899975309915 | F | F | F |
| 0.4096599940051888 | 0.3817800007265006 | 0.1725899975309915 | F | F | F |
| 0.4096599940051888 | 0.6682199563951130 | 0.1867800022190593 | F | F | F |
| 0.9096599473797582 | 0.1682200058663881 | 0.1867800022190593 | F | F | F |
| 0.6893518698626764 | 0.2676963334697007 | 0.2538688298127525 | F | F | F |
| 0.1851121421170845 | 0.7604519980367357 | 0.2529874285625340 | F | F | F |
| 0.4180599929386020 | 0.7820899854366203 | 0.0870100033908230 | F | F | F |
| 0.9180600395836080 | 0.2820900184369464 | 0.0870100033908230 | F | F | F |
| 0.9157073156774658 | 0.7646978485166116 | 0.2886715595630278 | F | F | F |
| 0.4169613846379363 | 0.2656159437137831 | 0.2810073686387540 | F | F | F |
| 0.6819400070927131 | 0.4224300249339308 | 0.1752299989317905 | F | F | F |
| 0.1819400070339938 | 0.9224299589227130 | 0.1752299989317905 | F | F | F |
| 0.1819400070339938 | 0.1275800053274239 | 0.1841400008182603 | F | F | F |
| 0.6819400070927131 | 0.6275799970331946 | 0.1841400008182603 | F | F | F |
| 0.6293235619895299 | 0.3888557242176560 | 0.3536627260583813 | F | F | F |
| 0.1391952812663675 | 0.8954354359260819 | 0.3512432274548374 | F | F | F |
| 0.9572246403566567 | 0.0115974607423013 | 0.2704316597044851 | F | F | F |
| 0.4564969009102811 | 0.5141465274375747 | 0.2693843010337389 | F | F | F |
| 0.1609373182057325 | 0.6487382181574972 | 0.3655677715260879 | F | F | F |
| 0.6409813884220341 | 0.1506682892449405 | 0.3629506728967797 | F | F | F |
| 0.4545100164061751 | 0.5361400390910305 | 0.0984700048222891 | F | F | F |
| 0.9545099696828743 | 0.0361399978344039 | 0.0984700048222891 | F | F | F |
| 0.4096599940051888 | 0.0137099999541945 | 0.0896599967858833 | F | F | F |
| 0.9096599473797582 | 0.5137100339442853 | 0.0896599967858833 | F | F | F |
| 0.7093428138973508 | 0.9216601589052402 | 0.3641483660669991 | F | F | F |
| 0.3093881114463528 | 0.3965928855174425 | 0.3887683084744751 | F | F | F |
| 0.2001747249902763 | 0.1314314536435788 | 0.3566799780395797 | F | F | F |
| 0.6935813085299145 | 0.6269261796762393 | 0.3435803395605532 | F | F | F |
| 0.9003512226987169 | 0.5359139053716362 | 0.2835187503129077 | F | F | F |
| 0.4065342637255824 | 0.0386200845481994 | 0.2778336978149198 | F | F | F |
| 0.8220573391403789 | 0.6577407387485081 | 0.5137929882499819 | T | T | T |
| 0.6057857722475930 | 0.7055660118434304 | 0.5345681620208680 | T | T | T |
| 0.799999999960821  | 0.7581899815577415 | 0.1902599906343454 | F | F | F |
| 0.3000000233283728 | 0.7918100085160802 | 0.1691199954394378 | F | F | F |
| 0.3000000233283728 | 0.2581899980872535 | 0.1902599906343454 | F | F | F |
| 0.799999999960821  | 0.2918100085747710 | 0.1691199954394378 | F | F | F |
| 0.8336300498524380 | 0.0250000012150764 | 0.1796899987074170 | F | F | F |
| 0.7675130936415115 | 0.2664274489806502 | 0.3509482103137387 | F | F | F |

|                    |                    |                    |   |   |   |
|--------------------|--------------------|--------------------|---|---|---|
| 0.3336300032074320 | 0.5249999785261750 | 0.1796899987074170 | F | F | F |
| 0.2700802433701881 | 0.7744955554088193 | 0.3490462433990018 | F | F | F |
| 0.5473461414544261 | 0.9176001341970945 | 0.2816376802013210 | F | F | F |
| 0.5500000000156575 | 0.1331900063373723 | 0.0905399972845800 | F | F | F |
| 0.0324755704725703 | 0.4130686092617424 | 0.2793483688700178 | F | F | F |
| 0.0499999999569383 | 0.6331899898077324 | 0.0905399972845800 | F | F | F |
| 0.7941401238061090 | 0.0464614814438775 | 0.3408366296584617 | F | F | F |
| 0.2816563356113591 | 0.9995375678385869 | 0.3534457947481329 | F | F | F |
| 0.3123332925062812 | 0.5448831316229672 | 0.3480944086535658 | F | F | F |
| 0.7849130636181130 | 0.4960633582362632 | 0.3696171403877671 | F | F | F |
| 0.7569689772442985 | 0.7836429515386811 | 0.3523307076379609 | F | F | F |
| 0.8336300498524380 | 0.5249999785261750 | 0.1796899987074170 | F | F | F |
| 0.2724931235463046 | 0.2658779296745664 | 0.3520096915647244 | F | F | F |
| 0.3336300032074320 | 0.0250000012150764 | 0.1796899987074170 | F | F | F |
| 0.0466760926194425 | 0.8797938667433485 | 0.2592453611704713 | F | F | F |
| 0.0499999999569383 | 0.1668100002848689 | 0.1116700004375772 | F | F | F |
| 0.5468946439506794 | 0.3821950540436703 | 0.2569011809272226 | F | F | F |
| 0.5500000000156575 | 0.6668099508135938 | 0.1116700004375772 | F | F | F |
| 0.5500000000156575 | 0.4000000197871927 | 0.1011099948343812 | F | F | F |
| 0.0473220056099208 | 0.1478334907078249 | 0.2713544164904746 | F | F | F |
| 0.5500000000156575 | 0.8999999537759749 | 0.1011099948343812 | F | F | F |
| 0.0497604744717108 | 0.6451309012504964 | 0.2751741728262544 | F | F | F |
| 0.0499999999569383 | 0.4000000197871927 | 0.1011099948343812 | F | F | F |
| 0.0499999999569383 | 0.8999999537759749 | 0.1011099948343812 | F | F | F |
| 0.5489776459622959 | 0.6506312226995874 | 0.2649471752857551 | F | F | F |
| 0.5513667295828810 | 0.1496526203601363 | 0.2687467888892314 | F | F | F |
| 0.3966616973992103 | 0.5702265568825808 | 0.4832244857029124 | F | F | F |
| 0.4936771837512239 | 0.4374611445146357 | 0.4211803148189333 | F | F | F |
| 0.5938248123633301 | 0.6752273078945805 | 0.4212958919926848 | F | F | F |
| 0.6755579726105339 | 0.5110297599075508 | 0.4859732012563782 | F | F | F |
| 0.7073056246014318 | 0.6558663032187795 | 0.4960801748532333 | T | T | T |
| 0.5365748384107292 | 0.6591177337920443 | 0.5432142628800589 | T | T | T |

Pd2pt2 ts3

1.0000000000000000

10.2175998688000007 0.0000000000000000 0.0000000000000000

0.0000000000000000 14.4497995377000006 0.0000000000000000

0.0000000000000000 0.0000000000000000 20.9857006073000001

| O  | In | Pd | Pt | C | H |
|----|----|----|----|---|---|
| 50 | 32 | 2  | 2  | 1 | 1 |

Selective dynamics

Direct

|                    |                    |                    |   |   |   |
|--------------------|--------------------|--------------------|---|---|---|
| 0.1819400070339938 | 0.5179200200303384 | 0.1152000000018631 | F | F | F |
|--------------------|--------------------|--------------------|---|---|---|

|                    |                    |                    |   |   |   |
|--------------------|--------------------|--------------------|---|---|---|
| 0.6819400070927131 | 0.0179200014037875 | 0.1152000000018631 | F | F | F |
| 0.6798680929876397 | 0.0311921774501442 | 0.2524535922911539 | T | T | T |
| 0.1810240422431093 | 0.5186047280153332 | 0.2638274162691019 | T | T | T |
| 0.9094663719330995 | 0.3772811940827410 | 0.3592284586009029 | T | T | T |
| 0.4106895111854882 | 0.8844070853790740 | 0.3584322793566983 | T | T | T |
| 0.4317766659548496 | 0.6757715580445733 | 0.3496543750157883 | T | T | T |
| 0.9153943295004154 | 0.1645218261793175 | 0.3492199337419279 | T | T | T |
| 0.9545099696828743 | 0.3957999996525388 | 0.1866900003632566 | F | F | F |
| 0.4545100164061751 | 0.8957999666521701 | 0.1866900003632566 | F | F | F |
| 0.6439510367054666 | 0.7866680682181979 | 0.2645726312194014 | T | T | T |
| 0.1416402872425380 | 0.2867616130226907 | 0.2723858237392562 | T | T | T |
| 0.4545100164061751 | 0.1542000069403500 | 0.1726800107755011 | F | F | F |
| 0.9545099696828743 | 0.6542000234215450 | 0.1726800107755011 | F | F | F |
| 0.1454900069574379 | 0.7638599674829010 | 0.1037499962351802 | F | F | F |
| 0.6454899836251471 | 0.2638599840124058 | 0.1037499962351802 | F | F | F |
| 0.1903399943208370 | 0.2862900056299651 | 0.1125700076069052 | F | F | F |
| 0.6903399592441062 | 0.7862899726296391 | 0.1125700076069052 | F | F | F |
| 0.9096599473797582 | 0.8817800337478090 | 0.1725899975309915 | F | F | F |
| 0.4096599940051888 | 0.3817800007265006 | 0.1725899975309915 | F | F | F |
| 0.4096599940051888 | 0.6682199563951130 | 0.1867800022190593 | F | F | F |
| 0.9096599473797582 | 0.1682200058663881 | 0.1867800022190593 | F | F | F |
| 0.6892238595159199 | 0.2669893807549641 | 0.2534656394872101 | T | T | T |
| 0.1853113972044866 | 0.7604485773587015 | 0.2530680370125395 | T | T | T |
| 0.4180599929386020 | 0.7820899854366274 | 0.0870100033908230 | F | F | F |
| 0.9180600395836080 | 0.2820900184369464 | 0.0870100033908230 | F | F | F |
| 0.9158701777005192 | 0.7648047833811162 | 0.2885836902562247 | T | T | T |
| 0.4170484203548313 | 0.2657920988926250 | 0.2810833647468485 | T | T | T |
| 0.6819400070927131 | 0.4224300249339308 | 0.1752299989317905 | F | F | F |
| 0.1819400070339938 | 0.9224299589227201 | 0.1752299989317905 | F | F | F |
| 0.1819400070339938 | 0.1275800053274239 | 0.1841400008182603 | F | F | F |
| 0.6819400070927131 | 0.6275799970331946 | 0.1841400008182603 | F | F | F |
| 0.6324969629528709 | 0.3888951541215633 | 0.3527007043011423 | T | T | T |
| 0.1395101543850572 | 0.8954734806574791 | 0.3512727408554923 | T | T | T |
| 0.9574762128482917 | 0.0117061887114929 | 0.2704814162582849 | T | T | T |
| 0.4561687747870451 | 0.5139091178345652 | 0.2700180879773626 | T | T | T |
| 0.1609662115379891 | 0.6484583765667153 | 0.3655388478140011 | T | T | T |
| 0.6412772914671976 | 0.1509608763805304 | 0.3629863990874895 | T | T | T |
| 0.4545100164061751 | 0.5361400390910305 | 0.0984700048222891 | F | F | F |
| 0.9545099696828743 | 0.0361399978344039 | 0.0984700048222891 | F | F | F |
| 0.4096599940051888 | 0.0137099999541945 | 0.0896599967858833 | F | F | F |
| 0.9096599473797582 | 0.5137100339442853 | 0.0896599967858833 | F | F | F |
| 0.7093415274510875 | 0.9220926590583360 | 0.3640592419235205 | T | T | T |
| 0.3072801175435700 | 0.3985925266144434 | 0.3882442137559536 | T | T | T |
| 0.2012643063371726 | 0.1323904588968361 | 0.3566145522719992 | T | T | T |



|                    |                    |                    |   |   |   |
|--------------------|--------------------|--------------------|---|---|---|
| 0.6931068124073718 | 0.6260466799039577 | 0.3434558500469436 | T | T | T |
| 0.9003123713727987 | 0.5359712880163841 | 0.2833498217063806 | T | T | T |
| 0.4065258927414703 | 0.0385704561070739 | 0.2778080519033566 | T | T | T |
| 0.8238815570668550 | 0.6563285699239358 | 0.5144318611359111 | T | T | T |
| 0.6065521941792582 | 0.7068878129908569 | 0.5325971550367044 | T | T | T |
| 0.799999999960821  | 0.7581899815577486 | 0.1902599906343454 | F | F | F |
| 0.3000000233283728 | 0.7918100085160873 | 0.1691199954394378 | F | F | F |
| 0.3000000233283728 | 0.2581899980872535 | 0.1902599906343454 | F | F | F |
| 0.799999999960821  | 0.2918100085747710 | 0.1691199954394378 | F | F | F |
| 0.8336300498524380 | 0.0250000012150764 | 0.1796899987074170 | F | F | F |
| 0.7678630112508955 | 0.2669620327220841 | 0.3506069406572720 | T | T | T |
| 0.3336300032074320 | 0.5249999785261750 | 0.1796899987074170 | F | F | F |
| 0.2704717374047476 | 0.7741826059185257 | 0.3491167120217327 | T | T | T |
| 0.5473485629015187 | 0.9176674985072992 | 0.2816240301155801 | T | T | T |
| 0.5500000000156575 | 0.1331900063373723 | 0.0905399972845800 | F | F | F |
| 0.0326915649610271 | 0.4131269690887009 | 0.2793251881063981 | T | T | T |
| 0.0499999999569383 | 0.6331899898077324 | 0.0905399972845800 | F | F | F |
| 0.7942024232954026 | 0.0469042133603566 | 0.3407531924096716 | T | T | T |
| 0.2816227299737548 | 0.9998746988842484 | 0.3534583571963950 | T | T | T |
| 0.3107621087669941 | 0.5433581368682212 | 0.3480956342857056 | T | T | T |
| 0.7840605241297283 | 0.4951851567485548 | 0.3689004055432790 | T | T | T |
| 0.7575375688058656 | 0.7842936239958860 | 0.3521824770630531 | T | T | T |
| 0.8336300498524380 | 0.5249999785261750 | 0.1796899987074170 | F | F | F |
| 0.2721774176828333 | 0.2677085014478138 | 0.3519413587447886 | T | T | T |
| 0.3336300032074320 | 0.0250000012150764 | 0.1796899987074170 | F | F | F |
| 0.0469664213084187 | 0.8798998744302864 | 0.2592633424107973 | T | T | T |
| 0.0499999999569383 | 0.1668100002848689 | 0.1116700004375772 | F | F | F |
| 0.5472323385852533 | 0.3820832525192728 | 0.2570646439737700 | T | T | T |
| 0.5500000000156575 | 0.6668099508135938 | 0.1116700004375772 | F | F | F |
| 0.5500000000156575 | 0.4000000197871927 | 0.1011099948343812 | F | F | F |
| 0.0477271041288674 | 0.1479864307983121 | 0.2714180142471392 | T | T | T |
| 0.5500000000156575 | 0.8999999537759820 | 0.1011099948343812 | F | F | F |
| 0.0497635709457214 | 0.6451260086106743 | 0.2751024376934978 | T | T | T |
| 0.0499999999569383 | 0.4000000197871927 | 0.1011099948343812 | F | F | F |
| 0.0499999999569383 | 0.8999999537759820 | 0.1011099948343812 | F | F | F |
| 0.5484529615805229 | 0.6504096678020943 | 0.2651218041754007 | T | T | T |
| 0.5511481611848765 | 0.1496911431258852 | 0.2689015833479118 | T | T | T |
| 0.4023142804537301 | 0.5709431845553112 | 0.4815644771976153 | T | T | T |
| 0.4960515277542967 | 0.4342960858514004 | 0.4215106823686199 | T | T | T |
| 0.5967067926358922 | 0.6752242768147383 | 0.4212796499472873 | T | T | T |
| 0.6757246993576587 | 0.5103560349860246 | 0.4869395653382753 | T | T | T |
| 0.7099213469289722 | 0.6545819864222082 | 0.4957576077600905 | T | T | T |
| 0.5385612477708435 | 0.6605889908195905 | 0.5441132693092285 | T | T | T |

Pd3pt ts3

1.00000000000000

10.2175998688000007 0.0000000000000000 0.0000000000000000

0.0000000000000000 14.4497995377000006 0.0000000000000000

0.0000000000000000 0.0000000000000000 20.9857006073000001

| O  | In | Pd | Pt | C | H |
|----|----|----|----|---|---|
| 50 | 32 | 3  | 1  | 1 | 1 |

Selective dynamics

Direct

|                    |                    |                    |   |   |   |
|--------------------|--------------------|--------------------|---|---|---|
| 0.1819400070339938 | 0.5179200200303384 | 0.1152000000018631 | F | F | F |
| 0.6819400070927131 | 0.0179200014037875 | 0.1152000000018631 | F | F | F |
| 0.6797180746198990 | 0.0283410023738284 | 0.2539492003530484 | F | F | F |
| 0.1789553448427696 | 0.5183592264686752 | 0.2623683318456216 | F | F | F |
| 0.9115972740842722 | 0.3794706823234151 | 0.3590675163643766 | F | F | F |
| 0.4090035326404546 | 0.8838524764589408 | 0.3585022183400994 | F | F | F |
| 0.4192837614662253 | 0.6741823041414250 | 0.3469068754176163 | F | F | F |
| 0.9153455039789193 | 0.1637119911431668 | 0.3495780245541624 | F | F | F |
| 0.9545099696828743 | 0.3957999996525245 | 0.1866900003632566 | F | F | F |
| 0.4545100164061751 | 0.8957999666521346 | 0.1866900003632566 | F | F | F |
| 0.6416920458723752 | 0.7864383707968514 | 0.2642304075985678 | F | F | F |
| 0.1433293762807608 | 0.2870865836810665 | 0.2729676435832786 | F | F | F |
| 0.4545100164061751 | 0.1542000069403500 | 0.1726800107755011 | F | F | F |
| 0.9545099696828743 | 0.6542000234215450 | 0.1726800107755011 | F | F | F |
| 0.1454900069574379 | 0.7638599674828654 | 0.1037499962351802 | F | F | F |
| 0.6454899836251471 | 0.2638599840124058 | 0.1037499962351802 | F | F | F |
| 0.1903399943208370 | 0.2862900056299651 | 0.1125700076069052 | F | F | F |
| 0.6903399592441062 | 0.7862899726296035 | 0.1125700076069052 | F | F | F |
| 0.9096599473797582 | 0.8817800337477735 | 0.1725899975309915 | F | F | F |
| 0.4096599940051888 | 0.3817800007264864 | 0.1725899975309915 | F | F | F |
| 0.4096599940051888 | 0.6682199563951130 | 0.1867800022190593 | F | F | F |
| 0.9096599473797582 | 0.1682200058663881 | 0.1867800022190593 | F | F | F |
| 0.6896019553024786 | 0.2664352872251570 | 0.2536013478872690 | F | F | F |
| 0.1854100340066580 | 0.7615696234540295 | 0.2526983539182837 | F | F | F |
| 0.4180599929386020 | 0.7820899854365919 | 0.0870100033908230 | F | F | F |
| 0.9180600395836080 | 0.2820900184369464 | 0.0870100033908230 | F | F | F |
| 0.9171219044254073 | 0.7656782232946426 | 0.2852394975597861 | F | F | F |
| 0.4183758140682627 | 0.2660867613059636 | 0.2816367836972020 | F | F | F |
| 0.6819400070927131 | 0.4224300249339166 | 0.1752299989317905 | F | F | F |
| 0.1819400070339938 | 0.9224299589226845 | 0.1752299989317905 | F | F | F |
| 0.1819400070339938 | 0.1275800053274239 | 0.1841400008182603 | F | F | F |
| 0.6819400070927131 | 0.6275799970331946 | 0.1841400008182603 | F | F | F |
| 0.6381765353143578 | 0.3922592546700088 | 0.3519893463956123 | F | F | F |

|                    |                    |                    |   |   |   |
|--------------------|--------------------|--------------------|---|---|---|
| 0.1374307452190635 | 0.8968552661071243 | 0.3512028015487729 | F | F | F |
| 0.9567079270710437 | 0.0120008149044324 | 0.2706625722917053 | F | F | F |
| 0.4569774287645529 | 0.5140755802531842 | 0.2706187793693857 | F | F | F |
| 0.1491027958144500 | 0.6502293605902167 | 0.3646316775316478 | F | F | F |
| 0.6434960417529965 | 0.1501806694155974 | 0.3631246128901182 | F | F | F |
| 0.4545100164061751 | 0.5361400390910305 | 0.0984700048222891 | F | F | F |
| 0.9545099696828743 | 0.0361399978344039 | 0.0984700048222891 | F | F | F |
| 0.4096599940051888 | 0.0137099999541945 | 0.0896599967858833 | F | F | F |
| 0.9096599473797582 | 0.5137100339442853 | 0.0896599967858833 | F | F | F |
| 0.7142519266323575 | 0.9155059079653114 | 0.3666935983221080 | F | F | F |
| 0.3094979821767581 | 0.3997452752343165 | 0.3909754717081739 | F | F | F |
| 0.2018823550901629 | 0.1327982847275848 | 0.3568114287204622 | F | F | F |
| 0.6912518449493135 | 0.6405210354348796 | 0.3549433944696716 | F | F | F |
| 0.8976964482551466 | 0.5379907496732343 | 0.2824982755013892 | F | F | F |
| 0.4065443624240928 | 0.0386448346710324 | 0.2779722118420196 | F | F | F |
| 0.7649300064322873 | 0.6775908268159654 | 0.5164036557746030 | T | T | T |
| 0.5207323738376743 | 0.6544386400397855 | 0.5374618156542184 | T | T | T |
| 0.799999999960821  | 0.7581899815577131 | 0.1902599906343454 | F | F | F |
| 0.3000000233283728 | 0.7918100085160518 | 0.1691199954394378 | F | F | F |
| 0.3000000233283728 | 0.2581899980872535 | 0.1902599906343454 | F | F | F |
| 0.799999999960821  | 0.2918100085747710 | 0.1691199954394378 | F | F | F |
| 0.8336300498524380 | 0.0250000012150693 | 0.1796899987074170 | F | F | F |
| 0.7702343255058821 | 0.2680445027545986 | 0.3502712882091927 | F | F | F |
| 0.3336300032074320 | 0.5249999785261750 | 0.1796899987074170 | F | F | F |
| 0.2644225945641665 | 0.7746421038916864 | 0.3498006656072263 | F | F | F |
| 0.5447059903883513 | 0.9166074518130642 | 0.2816334551000708 | F | F | F |
| 0.5500000000156575 | 0.1331900063373723 | 0.0905399972845800 | F | F | F |
| 0.0316567850640226 | 0.4126556601422990 | 0.2791994000413922 | F | F | F |
| 0.049999999569383  | 0.6331899898077324 | 0.0905399972845800 | F | F | F |
| 0.7943964880124668 | 0.0444262106002498 | 0.3416611709169217 | F | F | F |
| 0.2814291605088002 | 0.0001911812083719 | 0.3536839739909610 | F | F | F |
| 0.3031282222040730 | 0.5450612805304118 | 0.3454078186035900 | F | F | F |
| 0.7869416886554674 | 0.5015710223151473 | 0.3672185736456015 | F | F | F |
| 0.7605604863311584 | 0.7800304999878023 | 0.3487728211415941 | F | F | F |
| 0.8336300498524380 | 0.5249999785261750 | 0.1796899987074170 | F | F | F |
| 0.2740614961967651 | 0.2683008039407682 | 0.3527489189518391 | F | F | F |
| 0.3336300032074320 | 0.0250000012150693 | 0.1796899987074170 | F | F | F |
| 0.0482148648974388 | 0.8812948258221525 | 0.2581864896575610 | F | F | F |
| 0.049999999569383  | 0.1668100002848689 | 0.1116700004375772 | F | F | F |
| 0.5482455898833720 | 0.3822602876692187 | 0.2572654189321426 | F | F | F |
| 0.5500000000156575 | 0.6668099508135938 | 0.1116700004375772 | F | F | F |
| 0.5500000000156575 | 0.4000000197871785 | 0.1011099948343812 | F | F | F |
| 0.0480005819483509 | 0.1482607006297130 | 0.2718771147347567 | F | F | F |
| 0.5500000000156575 | 0.8999999537759464 | 0.1011099948343812 | F | F | F |

|                    |                    |                    |   |   |   |
|--------------------|--------------------|--------------------|---|---|---|
| 0.0488807458160565 | 0.6463099709594857 | 0.2727558684692326 | F | F | F |
| 0.0499999999569383 | 0.4000000197871785 | 0.1011099948343812 | F | F | F |
| 0.0499999999569383 | 0.8999999537759464 | 0.1011099948343812 | F | F | F |
| 0.5488642704141569 | 0.6504008189576638 | 0.2673470953162607 | F | F | F |
| 0.5522625177536469 | 0.1492586212864992 | 0.2692319495987050 | F | F | F |
| 0.3364475012005812 | 0.5449662873291672 | 0.4727576698567972 | F | F | F |
| 0.4995429130704494 | 0.4367340760529999 | 0.4215546030235018 | F | F | F |
| 0.5442153434017101 | 0.6499068187204813 | 0.4322461066153451 | F | F | F |
| 0.6957152462152507 | 0.4942870789506344 | 0.4868080059562203 | F | F | F |
| 0.6750971134304464 | 0.6297479560968782 | 0.4984008005435001 | T | T | T |
| 0.4945267798548301 | 0.5922785832709110 | 0.5511410555102101 | T | T | T |

Pd4 ts3

1.0000000000000000

|                     |                     |                     |
|---------------------|---------------------|---------------------|
| 10.2175998688000007 | 0.0000000000000000  | 0.0000000000000000  |
| 0.0000000000000000  | 14.4497995377000006 | 0.0000000000000000  |
| 0.0000000000000000  | 0.0000000000000000  | 20.9857006073000001 |

|    |    |    |   |   |
|----|----|----|---|---|
| O  | In | Pd | C | H |
| 50 | 32 | 4  | 1 | 1 |

Selective dynamics

Direct

|                    |                    |                    |   |   |   |
|--------------------|--------------------|--------------------|---|---|---|
| 0.1819400070339938 | 0.5179200200303384 | 0.1152000000018631 | F | F | F |
| 0.6819400070927131 | 0.0179200014037875 | 0.1152000000018631 | F | F | F |
| 0.6797152527898049 | 0.0287206945085998 | 0.2541427550775239 | F | F | F |
| 0.1811133000528784 | 0.5183679788128757 | 0.2634123775375272 | F | F | F |
| 0.9171957171384832 | 0.3786158489392619 | 0.3599276715866893 | F | F | F |
| 0.4102475528326792 | 0.8831519429635435 | 0.3582541816559868 | F | F | F |
| 0.4239918004073076 | 0.6743279488483012 | 0.3489260981985112 | F | F | F |
| 0.9161137689153094 | 0.1637559773801698 | 0.3494762793675932 | F | F | F |
| 0.9545099696828743 | 0.395799996525459  | 0.1866900003632566 | F | F | F |
| 0.4545100164061751 | 0.8957999666521701 | 0.1866900003632566 | F | F | F |
| 0.6421080954417206 | 0.7870099346617891 | 0.2642542476573055 | F | F | F |
| 0.1436076459277729 | 0.2854318973198815 | 0.2725952325468057 | F | F | F |
| 0.4545100164061751 | 0.1542000069403500 | 0.1726800107755011 | F | F | F |
| 0.9545099696828743 | 0.6542000234215450 | 0.1726800107755011 | F | F | F |
| 0.1454900069574379 | 0.7638599674828939 | 0.1037499962351802 | F | F | F |
| 0.6454899836251471 | 0.2638599840124058 | 0.1037499962351802 | F | F | F |
| 0.1903399943208370 | 0.2862900056299651 | 0.1125700076069052 | F | F | F |
| 0.6903399592441062 | 0.7862899726296320 | 0.1125700076069052 | F | F | F |
| 0.9096599473797582 | 0.8817800337478090 | 0.1725899975309915 | F | F | F |
| 0.4096599940051888 | 0.3817800007265078 | 0.1725899975309915 | F | F | F |
| 0.4096599940051888 | 0.6682199563951130 | 0.1867800022190593 | F | F | F |
| 0.9096599473797582 | 0.1682200058663881 | 0.1867800022190593 | F | F | F |

|                    |                    |                    |   |   |   |
|--------------------|--------------------|--------------------|---|---|---|
| 0.6896620292154765 | 0.2661961615521022 | 0.2535217108420795 | F | F | F |
| 0.1866910478727917 | 0.7612546028190295 | 0.2528186180699237 | F | F | F |
| 0.4180599929386020 | 0.7820899854366203 | 0.0870100033908230 | F | F | F |
| 0.9180600395836080 | 0.2820900184369464 | 0.0870100033908230 | F | F | F |
| 0.9178798648357613 | 0.7658070982163778 | 0.2850461425009954 | F | F | F |
| 0.4180417672291838 | 0.2664726479465926 | 0.2827045502970336 | F | F | F |
| 0.6819400070927131 | 0.4224300249339379 | 0.1752299989317905 | F | F | F |
| 0.1819400070339938 | 0.9224299589227201 | 0.1752299989317905 | F | F | F |
| 0.1819400070339938 | 0.1275800053274239 | 0.1841400008182603 | F | F | F |
| 0.6819400070927131 | 0.6275799970331946 | 0.1841400008182603 | F | F | F |
| 0.6457682891208236 | 0.3948183240333378 | 0.3492239849672529 | F | F | F |
| 0.1373107124334823 | 0.8955897556813497 | 0.3513893561805190 | F | F | F |
| 0.9558806028744087 | 0.0112592874919173 | 0.2707530466060675 | F | F | F |
| 0.4570435090372698 | 0.5145856493546788 | 0.2712289582623058 | F | F | F |
| 0.1513257276137381 | 0.6514061856381730 | 0.3645343338799876 | F | F | F |
| 0.6442221328844653 | 0.1514951540820277 | 0.3632487400901354 | F | F | F |
| 0.4545100164061751 | 0.5361400390910305 | 0.0984700048222891 | F | F | F |
| 0.9545099696828743 | 0.0361399978344039 | 0.0984700048222891 | F | F | F |
| 0.4096599940051888 | 0.0137099999541945 | 0.0896599967858833 | F | F | F |
| 0.9096599473797582 | 0.5137100339442853 | 0.0896599967858833 | F | F | F |
| 0.7139311335154517 | 0.9170750408758437 | 0.3677201265663896 | F | F | F |
| 0.3064908678855218 | 0.3907751854398356 | 0.3920832545922295 | F | F | F |
| 0.1970012263216319 | 0.1283463512564040 | 0.3578348686667354 | F | F | F |
| 0.6953053509307523 | 0.6435399871538579 | 0.3563511582945367 | F | F | F |
| 0.8991462251425091 | 0.5380100425148271 | 0.2825965213434714 | F | F | F |
| 0.4061442096637293 | 0.0390653756423305 | 0.2783137276193841 | F | F | F |
| 0.7175823463678768 | 0.6640058974300374 | 0.5465582765967838 | T | T | T |
| 0.4779443945367632 | 0.6308211289948602 | 0.5265500822415490 | T | T | T |
| 0.799999999960821  | 0.7581899815577415 | 0.1902599906343454 | F | F | F |
| 0.3000000233283728 | 0.7918100085160802 | 0.1691199954394378 | F | F | F |
| 0.3000000233283728 | 0.2581899980872535 | 0.1902599906343454 | F | F | F |
| 0.799999999960821  | 0.2918100085747710 | 0.1691199954394378 | F | F | F |
| 0.8336300498524380 | 0.0250000012150764 | 0.1796899987074170 | F | F | F |
| 0.7725052152759559 | 0.2687955842892151 | 0.3500286706996434 | F | F | F |
| 0.3336300032074320 | 0.5249999785261750 | 0.1796899987074170 | F | F | F |
| 0.2658607420247847 | 0.7747680140576065 | 0.3497012347483803 | F | F | F |
| 0.5448005671639393 | 0.9172757496391384 | 0.2810909436690494 | F | F | F |
| 0.5500000000156575 | 0.1331900063373723 | 0.0905399972845800 | F | F | F |
| 0.0339559264763096 | 0.4124489789185191 | 0.2789990932493680 | F | F | F |
| 0.0499999999569383 | 0.6331899898077324 | 0.0905399972845800 | F | F | F |
| 0.7942558609920596 | 0.0451956737644679 | 0.3420108102124928 | F | F | F |
| 0.2814939666272807 | 0.9982969234060448 | 0.3538483337988581 | F | F | F |
| 0.3059014192865845 | 0.5480027485953158 | 0.3466156682489299 | F | F | F |
| 0.7931683338496356 | 0.5019651936649296 | 0.3688506787347592 | F | F | F |

|                    |                    |                    |   |   |   |
|--------------------|--------------------|--------------------|---|---|---|
| 0.7619392739266644 | 0.7827912001117951 | 0.3485063597721734 | F | F | F |
| 0.8336300498524380 | 0.5249999785261750 | 0.1796899987074170 | F | F | F |
| 0.2711185088606385 | 0.2612560858355835 | 0.3525084134652019 | F | F | F |
| 0.3336300032074320 | 0.0250000012150764 | 0.1796899987074170 | F | F | F |
| 0.0488343642543825 | 0.8810576512054595 | 0.2580072768486588 | F | F | F |
| 0.0499999999569383 | 0.1668100002848689 | 0.1116700004375772 | F | F | F |
| 0.5488586721057160 | 0.3825914288846093 | 0.2568979705640544 | F | F | F |
| 0.5500000000156575 | 0.6668099508135938 | 0.1116700004375772 | F | F | F |
| 0.5500000000156575 | 0.4000000197871998 | 0.1011099948343812 | F | F | F |
| 0.0463627474115427 | 0.1472851322633417 | 0.2710105033436108 | F | F | F |
| 0.5500000000156575 | 0.8999999537759820 | 0.1011099948343812 | F | F | F |
| 0.0496150255245453 | 0.6461703301558614 | 0.2727330533654140 | F | F | F |
| 0.0499999999569383 | 0.4000000197871998 | 0.1011099948343812 | F | F | F |
| 0.0499999999569383 | 0.8999999537759820 | 0.1011099948343812 | F | F | F |
| 0.5496099525513998 | 0.6507512003780676 | 0.2670731004151250 | F | F | F |
| 0.5525747767859670 | 0.1496294457739538 | 0.2693522657714169 | F | F | F |
| 0.2809978334196401 | 0.4825198137975732 | 0.4658573532220984 | F | F | F |
| 0.5056248780719272 | 0.4359411992316922 | 0.4165877957795914 | F | F | F |
| 0.6954100624507831 | 0.4966638386153548 | 0.4875783706804739 | F | F | F |
| 0.5541079233431532 | 0.6491538427146182 | 0.4294397509625441 | F | F | F |
| 0.6441530606482644 | 0.6297054295418150 | 0.5084063543385753 | T | T | T |
| 0.4548690940455060 | 0.5643514802246870 | 0.5214557241668798 | T | T | T |

CONTCAR(4) -co+oh-pt4

1.0000000000000000

10.2175998688000007 0.0000000000000000 0.0000000000000000

0.0000000000000000 14.4497995377000006 0.0000000000000000

0.0000000000000000 0.0000000000000000 20.9857006073000001

O In Pt C H

50 32 4 1 1

Selective dynamics

Direct

|                    |                    |                    |   |   |   |
|--------------------|--------------------|--------------------|---|---|---|
| 0.1819400070339938 | 0.5179200200303384 | 0.1152000000018631 | F | F | F |
| 0.6819400070927131 | 0.0179200014037875 | 0.1152000000018631 | F | F | F |
| 0.6796110179201236 | 0.0275511823982413 | 0.2538056607203174 | T | T | T |
| 0.1796232907400608 | 0.5182748453391639 | 0.2623545679311832 | T | T | T |
| 0.9203454585955129 | 0.3762226986489949 | 0.3581784411370492 | T | T | T |
| 0.4088211740859364 | 0.8833819009970227 | 0.3583514984526701 | T | T | T |
| 0.4234096633846249 | 0.6758481293550176 | 0.3491157008273049 | T | T | T |
| 0.9181744676635404 | 0.1618129207805126 | 0.3499775753954708 | T | T | T |
| 0.9545099696828743 | 0.3957999996524748 | 0.1866900003632566 | F | F | F |
| 0.4545100164061751 | 0.8957999666520209 | 0.1866900003632566 | F | F | F |
| 0.6415976293086700 | 0.7853851907998575 | 0.2652259453295258 | T | T | T |

|                    |                    |                    |   |   |   |
|--------------------|--------------------|--------------------|---|---|---|
| 0.1468352209373265 | 0.2859643775544214 | 0.2738089571158966 | T | T | T |
| 0.4545100164061751 | 0.1542000069403500 | 0.1726800107755011 | F | F | F |
| 0.9545099696828743 | 0.6542000234215450 | 0.1726800107755011 | F | F | F |
| 0.1454900069574379 | 0.7638599674827660 | 0.1037499962351802 | F | F | F |
| 0.6454899836251471 | 0.2638599840124058 | 0.1037499962351802 | F | F | F |
| 0.1903399943208370 | 0.2862900056299651 | 0.1125700076069052 | F | F | F |
| 0.6903399592441062 | 0.7862899726295041 | 0.1125700076069052 | F | F | F |
| 0.9096599473797582 | 0.8817800337476598 | 0.1725899975309915 | F | F | F |
| 0.4096599940051888 | 0.3817800007264367 | 0.1725899975309915 | F | F | F |
| 0.4096599940051888 | 0.6682199563951130 | 0.1867800022190593 | F | F | F |
| 0.9096599473797582 | 0.1682200058663881 | 0.1867800022190593 | F | F | F |
| 0.6897505602931844 | 0.2646925462477157 | 0.2529107209108616 | T | T | T |
| 0.1864165962261666 | 0.7621883312669055 | 0.2528471119657425 | T | T | T |
| 0.4180599929386020 | 0.7820899854364924 | 0.0870100033908230 | F | F | F |
| 0.9180600395836080 | 0.2820900184369464 | 0.0870100033908230 | F | F | F |
| 0.9151807129223002 | 0.7660941563165267 | 0.2855906541296775 | T | T | T |
| 0.4187806372002498 | 0.2669377595933682 | 0.2835734787545405 | T | T | T |
| 0.6819400070927131 | 0.4224300249338668 | 0.1752299989317905 | F | F | F |
| 0.1819400070339938 | 0.9224299589225708 | 0.1752299989317905 | F | F | F |
| 0.1819400070339938 | 0.1275800053274239 | 0.1841400008182603 | F | F | F |
| 0.6819400070927131 | 0.6275799970331946 | 0.1841400008182603 | F | F | F |
| 0.6507779683724806 | 0.3899953761246167 | 0.3484232354640824 | T | T | T |
| 0.1354466146106006 | 0.8971405860249533 | 0.3516027360125449 | T | T | T |
| 0.9562647479210185 | 0.0115389597248310 | 0.2703979475780827 | T | T | T |
| 0.4567124921662469 | 0.5145461060053336 | 0.2716826497017593 | T | T | T |
| 0.1486379320902032 | 0.6534186155762356 | 0.3626776531742024 | T | T | T |
| 0.6453297355827274 | 0.1494615195340714 | 0.3626613348066243 | T | T | T |
| 0.4545100164061751 | 0.5361400390910305 | 0.0984700048222891 | F | F | F |
| 0.9545099696828743 | 0.0361399978344039 | 0.0984700048222891 | F | F | F |
| 0.4096599940051888 | 0.0137099999541945 | 0.0896599967858833 | F | F | F |
| 0.9096599473797582 | 0.5137100339442853 | 0.0896599967858833 | F | F | F |
| 0.7122630639211707 | 0.9168541140625734 | 0.3675784750383855 | T | T | T |
| 0.3203833701056169 | 0.3839952840417169 | 0.4034842371818925 | T | T | T |
| 0.1982562756989594 | 0.1292013459048462 | 0.3580740234802420 | T | T | T |
| 0.6896270052204869 | 0.6441152527659852 | 0.3631750967660068 | T | T | T |
| 0.8973362868750598 | 0.5390356196857482 | 0.2832990700432632 | T | T | T |
| 0.4061123779200955 | 0.0388725942738475 | 0.2782121263994028 | T | T | T |
| 0.6961939275194098 | 0.6506396032636701 | 0.5495268286270942 | T | T | T |
| 0.3736363975153978 | 0.6316289214472022 | 0.4900263935980576 | T | T | T |
| 0.7999999999960821 | 0.7581899815576136 | 0.1902599906343454 | F | F | F |
| 0.3000000233283728 | 0.7918100085159523 | 0.1691199954394378 | F | F | F |
| 0.3000000233283728 | 0.2581899980872535 | 0.1902599906343454 | F | F | F |
| 0.7999999999960821 | 0.2918100085747710 | 0.1691199954394378 | F | F | F |
| 0.8336300498524380 | 0.0250000012150693 | 0.1796899987074170 | F | F | F |

|                    |                    |                    |   |   |   |
|--------------------|--------------------|--------------------|---|---|---|
| 0.7747718924905413 | 0.2658100240475960 | 0.3495110695522499 | T | T | T |
| 0.3336300032074320 | 0.5249999785261750 | 0.1796899987074170 | F | F | F |
| 0.2629451135670209 | 0.7766890810247418 | 0.3505663507678847 | T | T | T |
| 0.5445700501755226 | 0.9166870791262340 | 0.2812707888532344 | T | T | T |
| 0.5500000000156575 | 0.1331900063373723 | 0.0905399972845800 | F | F | F |
| 0.0344238489053410 | 0.4116312862205262 | 0.2781884553596328 | T | T | T |
| 0.0499999999569383 | 0.6331899898077324 | 0.0905399972845800 | F | F | F |
| 0.7951078842429595 | 0.0437093025868904 | 0.3414763235900153 | T | T | T |
| 0.2814203105232167 | 0.9990449835796724 | 0.3539117933948717 | T | T | T |
| 0.3021041551443275 | 0.5509241871371486 | 0.3436558796046967 | T | T | T |
| 0.7994051692381205 | 0.4996848515084196 | 0.3696298085676730 | T | T | T |
| 0.7598405171818712 | 0.7820466628456231 | 0.3502578895722692 | T | T | T |
| 0.8336300498524380 | 0.5249999785261750 | 0.1796899987074170 | F | F | F |
| 0.2740438351169132 | 0.2618784083337289 | 0.3544294315143190 | T | T | T |
| 0.3336300032074320 | 0.0250000012150693 | 0.1796899987074170 | F | F | F |
| 0.0480385311961484 | 0.8813103198120018 | 0.2578520393649057 | T | T | T |
| 0.0499999999569383 | 0.1668100002848689 | 0.1116700004375772 | F | F | F |
| 0.5494624246026589 | 0.3817302730195209 | 0.2566514634604502 | T | T | T |
| 0.5500000000156575 | 0.6668099508135938 | 0.1116700004375772 | F | F | F |
| 0.5500000000156575 | 0.4000000197871287 | 0.1011099948343812 | F | F | F |
| 0.0480917759168165 | 0.1473783255773355 | 0.2712016068024425 | T | T | T |
| 0.5500000000156575 | 0.8999999537758328 | 0.1011099948343812 | F | F | F |
| 0.0477094027644114 | 0.6477705658999184 | 0.2719281900515185 | T | T | T |
| 0.0499999999569383 | 0.4000000197871287 | 0.1011099948343812 | F | F | F |
| 0.0499999999569383 | 0.8999999537758328 | 0.1011099948343812 | F | F | F |
| 0.5487587930746969 | 0.6508975921346689 | 0.2665599564479848 | T | T | T |
| 0.5527709112106791 | 0.1489884688415728 | 0.2691723699419910 | T | T | T |
| 0.3184080721501203 | 0.5011502062753124 | 0.4625686062370704 | T | T | T |
| 0.5176319828965177 | 0.4250860390119797 | 0.4184237939641804 | T | T | T |
| 0.5418715461913308 | 0.6476462974688530 | 0.4304325229116515 | T | T | T |
| 0.7061906229577488 | 0.4866263343638408 | 0.4850367284291295 | T | T | T |
| 0.6563985875073186 | 0.6177423582249659 | 0.5002320058296448 | T | T | T |
| 0.4006215414020389 | 0.6338077404287077 | 0.5346560534171090 | T | T | T |

CONTCAR\4) cooh-co+oh-pdpt3-1-cc

1.0000000000000000

|                     |                     |                     |
|---------------------|---------------------|---------------------|
| 10.2175998688000007 | 0.0000000000000000  | 0.0000000000000000  |
| 0.0000000000000000  | 14.4497995377000006 | 0.0000000000000000  |
| 0.0000000000000000  | 0.0000000000000000  | 20.9857006073000001 |

| O  | In | Pd | Pt | C | H |
|----|----|----|----|---|---|
| 50 | 32 | 1  | 3  | 1 | 1 |

Selective dynamics

Direct

|                    |                    |                    |   |   |   |
|--------------------|--------------------|--------------------|---|---|---|
| 0.1819400070339938 | 0.5179200200303384 | 0.1152000000018631 | F | F | F |
| 0.6819400070927131 | 0.0179200014037875 | 0.1152000000018631 | F | F | F |



|                    |                    |                    |   |   |   |
|--------------------|--------------------|--------------------|---|---|---|
| 0.6798305117004162 | 0.0276527477844226 | 0.2538586370459868 | T | T | T |
| 0.1802647325859184 | 0.5174250130915894 | 0.2625500428775993 | T | T | T |
| 0.9172483278189816 | 0.3761375937561340 | 0.3579206702399418 | T | T | T |
| 0.4088607530606367 | 0.8828749300774774 | 0.3580287317070656 | T | T | T |
| 0.4244633191721121 | 0.6744663081796176 | 0.3490819444760618 | T | T | T |
| 0.9176289114347611 | 0.1618800727435072 | 0.3499880356510516 | T | T | T |
| 0.9545099696828743 | 0.395799996524748  | 0.1866900003632566 | F | F | F |
| 0.4545100164061751 | 0.8957999666520209 | 0.1866900003632566 | F | F | F |
| 0.6419880845417865 | 0.7853388193598434 | 0.2652057205239302 | T | T | T |
| 0.1460259466647713 | 0.2858953936833615 | 0.2735974050810910 | T | T | T |
| 0.4545100164061751 | 0.1542000069403500 | 0.1726800107755011 | F | F | F |
| 0.9545099696828743 | 0.6542000234215450 | 0.1726800107755011 | F | F | F |
| 0.1454900069574379 | 0.7638599674827660 | 0.1037499962351802 | F | F | F |
| 0.6454899836251471 | 0.2638599840124058 | 0.1037499962351802 | F | F | F |
| 0.1903399943208370 | 0.2862900056299651 | 0.1125700076069052 | F | F | F |
| 0.6903399592441062 | 0.7862899726295041 | 0.1125700076069052 | F | F | F |
| 0.9096599473797582 | 0.8817800337476598 | 0.1725899975309915 | F | F | F |
| 0.4096599940051888 | 0.3817800007264367 | 0.1725899975309915 | F | F | F |
| 0.4096599940051888 | 0.6682199563951130 | 0.1867800022190593 | F | F | F |
| 0.9096599473797582 | 0.1682200058663881 | 0.1867800022190593 | F | F | F |
| 0.6900163809975979 | 0.2652358554439829 | 0.2532768676114330 | T | T | T |
| 0.1865031721364403 | 0.7615759591500222 | 0.2530623560860477 | T | T | T |
| 0.4180599929386020 | 0.7820899854364924 | 0.0870100033908230 | F | F | F |
| 0.9180600395836080 | 0.2820900184369464 | 0.0870100033908230 | F | F | F |
| 0.9159071179617229 | 0.7653993662616116 | 0.2859736525428076 | T | T | T |
| 0.4186952751855628 | 0.2667066833571923 | 0.2829806904761654 | T | T | T |
| 0.6819400070927131 | 0.4224300249338668 | 0.1752299989317905 | F | F | F |
| 0.1819400070339938 | 0.9224299589225708 | 0.1752299989317905 | F | F | F |
| 0.1819400070339938 | 0.1275800053274239 | 0.1841400008182603 | F | F | F |
| 0.6819400070927131 | 0.6275799970331946 | 0.1841400008182603 | F | F | F |
| 0.6451370113646959 | 0.3907171753335561 | 0.3495688414282299 | T | T | T |
| 0.1362067881760254 | 0.8961472574120606 | 0.3517939578200995 | T | T | T |
| 0.9567445121679299 | 0.0112983037204017 | 0.2705245424309908 | T | T | T |
| 0.4573813748167339 | 0.5144323713312460 | 0.2708426138281794 | T | T | T |
| 0.1515355884763778 | 0.6505442992532267 | 0.3631686963160519 | T | T | T |
| 0.6448256163832582 | 0.1494725470353302 | 0.3627825425283717 | T | T | T |
| 0.4545100164061751 | 0.5361400390910305 | 0.0984700048222891 | F | F | F |
| 0.9545099696828743 | 0.0361399978344039 | 0.0984700048222891 | F | F | F |
| 0.4096599940051888 | 0.0137099999541945 | 0.0896599967858833 | F | F | F |
| 0.9096599473797582 | 0.5137100339442853 | 0.0896599967858833 | F | F | F |
| 0.7125779540911594 | 0.9165455770112558 | 0.3674581035396969 | T | T | T |
| 0.3116555535705743 | 0.3919043779926596 | 0.3984260166269138 | T | T | T |
| 0.1997971126596383 | 0.1299681614549826 | 0.3579752070239124 | T | T | T |
| 0.6911603389048011 | 0.6424265195912611 | 0.3616214020298685 | T | T | T |

|                    |                    |                    |   |   |   |
|--------------------|--------------------|--------------------|---|---|---|
| 0.8976051321139948 | 0.5384891546706712 | 0.2833969637980047 | T | T | T |
| 0.4062783193412898 | 0.0386398994909314 | 0.2782336555571163 | T | T | T |
| 0.6978360719330325 | 0.6482658558968026 | 0.5495714135288452 | T | T | T |
| 0.3801016793642233 | 0.6400996620422035 | 0.4885913946641480 | T | T | T |
| 0.799999999960821  | 0.7581899815576136 | 0.1902599906343454 | F | F | F |
| 0.3000000233283728 | 0.7918100085159523 | 0.1691199954394378 | F | F | F |
| 0.3000000233283728 | 0.2581899980872535 | 0.1902599906343454 | F | F | F |
| 0.799999999960821  | 0.2918100085747710 | 0.1691199954394378 | F | F | F |
| 0.8336300498524380 | 0.0250000012150693 | 0.1796899987074170 | F | F | F |
| 0.7734183654884745 | 0.2659521513518115 | 0.3498583712826218 | T | T | T |
| 0.3336300032074320 | 0.5249999785261750 | 0.1796899987074170 | F | F | F |
| 0.2641415195370911 | 0.7751233371448407 | 0.3506279157354086 | T | T | T |
| 0.5447375463664912 | 0.9165259229794600 | 0.2813001181418215 | T | T | T |
| 0.5500000000156575 | 0.1331900063373723 | 0.0905399972845800 | F | F | F |
| 0.0339575983125613 | 0.4115392718210131 | 0.2783563909572777 | T | T | T |
| 0.049999999569383  | 0.6331899898077324 | 0.0905399972845800 | F | F | F |
| 0.7952240112996094 | 0.0436321074772721 | 0.3415004595019937 | T | T | T |
| 0.2812094372450318 | 0.9987852594689102 | 0.3538278558930372 | T | T | T |
| 0.3051195651921148 | 0.5471113858513164 | 0.3442959269486821 | T | T | T |
| 0.7967005367587063 | 0.4993639862948740 | 0.3694289615223241 | T | T | T |
| 0.7597615537782261 | 0.7814713347966133 | 0.3503184362862513 | T | T | T |
| 0.8336300498524380 | 0.5249999785261750 | 0.1796899987074170 | F | F | F |
| 0.2743652448575560 | 0.2635233250526881 | 0.3539597685407685 | T | T | T |
| 0.3336300032074320 | 0.0250000012150693 | 0.1796899987074170 | F | F | F |
| 0.0482088150330284 | 0.8808322390588188 | 0.2581188986919329 | T | T | T |
| 0.049999999569383  | 0.1668100002848689 | 0.1116700004375772 | F | F | F |
| 0.5493015789485582 | 0.3816776776671986 | 0.2565133225585043 | T | T | T |
| 0.5500000000156575 | 0.6668099508135938 | 0.1116700004375772 | F | F | F |
| 0.5500000000156575 | 0.4000000197871287 | 0.1011099948343812 | F | F | F |
| 0.0481161145303020 | 0.1473700776705229 | 0.2713938047139521 | T | T | T |
| 0.5500000000156575 | 0.8999999537758328 | 0.1011099948343812 | F | F | F |
| 0.0487100783724514 | 0.6467477832206754 | 0.2724856147352526 | T | T | T |
| 0.049999999569383  | 0.4000000197871287 | 0.1011099948343812 | F | F | F |
| 0.049999999569383  | 0.8999999537758328 | 0.1011099948343812 | F | F | F |
| 0.5490234671085901 | 0.6506615460528309 | 0.2663159799493329 | T | T | T |
| 0.5526761967688856 | 0.1489491319855816 | 0.2691988557326894 | T | T | T |
| 0.3114756378910002 | 0.5066630734253863 | 0.4661512793884413 | T | T | T |
| 0.5069658930039296 | 0.4287768085852903 | 0.4176326889089736 | T | T | T |
| 0.5446651038314130 | 0.6482275524777918 | 0.4297909495962813 | T | T | T |
| 0.7001331768396852 | 0.4843100832901897 | 0.4843339064302228 | T | T | T |
| 0.6571969158626914 | 0.6168482101452284 | 0.4999984621479356 | T | T | T |
| 0.4081462493773316 | 0.6454802301507598 | 0.5329273286379532 | T | T | T |

1.0000000000000000  
 10.2175998688000007 0.0000000000000000 0.0000000000000000  
 0.0000000000000000 14.4497995377000006 0.0000000000000000  
 0.0000000000000000 0.0000000000000000 20.9857006073000001

O In Pd Pt C H  
 50 32 2 2 1 1

Selective dynamics

Direct

|                    |                    |                    |   |   |   |
|--------------------|--------------------|--------------------|---|---|---|
| 0.1819400070339938 | 0.5179200200303384 | 0.115200000018631  | F | F | F |
| 0.6819400070927131 | 0.0179200014037875 | 0.115200000018631  | F | F | F |
| 0.6793968372498597 | 0.0278573951071905 | 0.2540594417224997 | T | T | T |
| 0.1795102161577041 | 0.5179698964269844 | 0.2618272202719928 | T | T | T |
| 0.9193955715660953 | 0.3763014758098438 | 0.3583160859379866 | T | T | T |
| 0.4082411703837345 | 0.8831443317052766 | 0.3582620500098673 | T | T | T |
| 0.4235279905653796 | 0.6737871318875241 | 0.3492755078331677 | T | T | T |
| 0.9174380185718639 | 0.1623547784982480 | 0.3496464532288715 | T | T | T |
| 0.9545099696828743 | 0.3957999996524748 | 0.1866900003632566 | F | F | F |
| 0.4545100164061751 | 0.8957999666520209 | 0.1866900003632566 | F | F | F |
| 0.6411268323368454 | 0.7853586782173578 | 0.2652888851296388 | T | T | T |
| 0.1461597351081205 | 0.2863815326956697 | 0.2731912775828869 | T | T | T |
| 0.4545100164061751 | 0.1542000069403500 | 0.1726800107755011 | F | F | F |
| 0.9545099696828743 | 0.6542000234215450 | 0.1726800107755011 | F | F | F |
| 0.1454900069574379 | 0.7638599674827660 | 0.1037499962351802 | F | F | F |
| 0.6454899836251471 | 0.2638599840124058 | 0.1037499962351802 | F | F | F |
| 0.1903399943208370 | 0.2862900056299651 | 0.1125700076069052 | F | F | F |
| 0.6903399592441062 | 0.7862899726295041 | 0.1125700076069052 | F | F | F |
| 0.9096599473797582 | 0.8817800337476598 | 0.1725899975309915 | F | F | F |
| 0.4096599940051888 | 0.3817800007264367 | 0.1725899975309915 | F | F | F |
| 0.4096599940051888 | 0.6682199563951130 | 0.1867800022190593 | F | F | F |
| 0.9096599473797582 | 0.1682200058663881 | 0.1867800022190593 | F | F | F |
| 0.6895334945060038 | 0.2647133939328142 | 0.2529825901231875 | T | T | T |
| 0.1865024080937131 | 0.7618852392076936 | 0.2531185006681180 | T | T | T |
| 0.4180599929386020 | 0.7820899854364924 | 0.0870100033908230 | F | F | F |
| 0.9180600395836080 | 0.2820900184369464 | 0.0870100033908230 | F | F | F |
| 0.9154859332052330 | 0.7656469676760207 | 0.2857679697409829 | T | T | T |
| 0.4183400437794035 | 0.2670698307042313 | 0.2832304277906495 | T | T | T |
| 0.6819400070927131 | 0.4224300249338668 | 0.1752299989317905 | F | F | F |
| 0.1819400070339938 | 0.9224299589225708 | 0.1752299989317905 | F | F | F |
| 0.1819400070339938 | 0.1275800053274239 | 0.1841400008182603 | F | F | F |
| 0.6819400070927131 | 0.6275799970331946 | 0.1841400008182603 | F | F | F |
| 0.6475261585253308 | 0.3915730052822760 | 0.3484859200637180 | T | T | T |
| 0.1360669885946960 | 0.8965499233110841 | 0.3517874447210219 | T | T | T |
| 0.9566466735797893 | 0.0115194656277060 | 0.2705370689454007 | T | T | T |
| 0.4566826373058867 | 0.5141422198866599 | 0.2715257356461273 | T | T | T |

|                    |                     |                    |   |   |   |
|--------------------|---------------------|--------------------|---|---|---|
| 0.1505105288963812 | 0.6508334611813995  | 0.3630344795290009 | T | T | T |
| 0.6447588419900122 | 0.1501533185587289  | 0.3629560262995464 | T | T | T |
| 0.4545100164061751 | 0.5361400390910305  | 0.0984700048222891 | F | F | F |
| 0.9545099696828743 | 0.0361399978344039  | 0.0984700048222891 | F | F | F |
| 0.4096599940051888 | 0.0137099999541945  | 0.0896599967858833 | F | F | F |
| 0.9096599473797582 | 0.5137100339442853  | 0.0896599967858833 | F | F | F |
| 0.7125564126125238 | 0.9167039541958116  | 0.3674882712184545 | T | T | T |
| 0.3150354531469884 | 0.3950907273694544  | 0.3975350083027561 | T | T | T |
| 0.2006924920307056 | 0.1315887176057815  | 0.3578130685179521 | T | T | T |
| 0.6911748783891961 | 0.6418972838469569  | 0.3604567632884351 | T | T | T |
| 0.8978089729264789 | 0.5385009249538273  | 0.2830268025721652 | T | T | T |
| 0.4057061304148205 | 0.0387186173102183  | 0.2783127636281251 | T | T | T |
| 0.7071317196524249 | 0.6550196496843470  | 0.5460832477130887 | T | T | T |
| 0.3826732683733955 | 0.6416331394108966  | 0.4888005100577998 | T | T | T |
| 0.799999999960821  | 0.7581899815576136  | 0.1902599906343454 | F | F | F |
| 0.3000000233283728 | 0.7918100085159523  | 0.1691199954394378 | F | F | F |
| 0.3000000233283728 | 0.2581899980872535  | 0.1902599906343454 | F | F | F |
| 0.799999999960821  | 0.2918100085747710  | 0.1691199954394378 | F | F | F |
| 0.8336300498524380 | 0.0250000012150693  | 0.1796899987074170 | F | F | F |
| 0.7736310253873708 | 0.2667100193362734  | 0.3494173402694858 | T | T | T |
| 0.3336300032074320 | 0.5249999785261750  | 0.1796899987074170 | F | F | F |
| 0.2639506829868558 | 0.7752974378177330  | 0.3507337514759908 | T | T | T |
| 0.5440615131049565 | 0.9166591577579062  | 0.2814764482833644 | T | T | T |
| 0.5500000000156575 | 0.1331900063373723  | 0.0905399972845800 | F | F | F |
| 0.0339344640371110 | 0.4116309602391012  | 0.2780718167133296 | T | T | T |
| 0.0499999999569383 | 0.6331899898077324  | 0.0905399972845800 | F | F | F |
| 0.7947284459560514 | 0.0441329711523227  | 0.3415154134318304 | T | T | T |
| 0.2804611244296599 | -0.0003579088142354 | 0.3538867318898110 | T | T | T |
| 0.3026250137883858 | 0.5465967765256303  | 0.3438566783458347 | T | T | T |
| 0.7965666691913441 | 0.4987646914769987  | 0.3686714932445608 | T | T | T |
| 0.7593562974977522 | 0.7816170726842543  | 0.3500702237603014 | T | T | T |
| 0.8336300498524380 | 0.5249999785261750  | 0.1796899987074170 | F | F | F |
| 0.2733175916254085 | 0.2665557964297724  | 0.3542965538199515 | T | T | T |
| 0.3336300032074320 | 0.0250000012150693  | 0.1796899987074170 | F | F | F |
| 0.0480687945405453 | 0.8811111531971002  | 0.2581003456614060 | T | T | T |
| 0.0499999999569383 | 0.1668100002848689  | 0.1116700004375772 | F | F | F |
| 0.5493474869370784 | 0.3815676738426196  | 0.2565771884375065 | T | T | T |
| 0.5500000000156575 | 0.6668099508135938  | 0.1116700004375772 | F | F | F |
| 0.5500000000156575 | 0.4000000197871287  | 0.1011099948343812 | F | F | F |
| 0.0485001667182745 | 0.1476422994987278  | 0.2714536453047467 | T | T | T |
| 0.5500000000156575 | 0.8999999537758328  | 0.1011099948343812 | F | F | F |
| 0.0483848902797665 | 0.6470931726585548  | 0.2722581709958155 | T | T | T |
| 0.0499999999569383 | 0.4000000197871287  | 0.1011099948343812 | F | F | F |
| 0.0499999999569383 | 0.8999999537758328  | 0.1011099948343812 | F | F | F |

|                    |                    |                    |   |   |   |
|--------------------|--------------------|--------------------|---|---|---|
| 0.5486711491903299 | 0.6504007555432678 | 0.2664826744133132 | T | T | T |
| 0.5517327819052271 | 0.1491337020547147 | 0.2694830574106005 | T | T | T |
| 0.3169489717954196 | 0.5082947683902249 | 0.4651355986941461 | T | T | T |
| 0.5147350627238819 | 0.4306902699422489 | 0.4188222509180874 | T | T | T |
| 0.5456968212946208 | 0.6475951995537852 | 0.4291781872240023 | T | T | T |
| 0.7083006067299018 | 0.4877265009269400 | 0.4857680191208383 | T | T | T |
| 0.6624286832281921 | 0.6198486969435210 | 0.4985762720500517 | T | T | T |
| 0.4115195022612400 | 0.6468678038773545 | 0.5330213941671550 | T | T | T |

CONTCAR(2) -co+oh-pd3pt

1.0000000000000000

|                     |                     |                     |
|---------------------|---------------------|---------------------|
| 10.2175998688000007 | 0.0000000000000000  | 0.0000000000000000  |
| 0.0000000000000000  | 14.4497995377000006 | 0.0000000000000000  |
| 0.0000000000000000  | 0.0000000000000000  | 20.9857006073000001 |

|    |    |    |    |   |   |
|----|----|----|----|---|---|
| O  | In | Pd | Pt | C | H |
| 50 | 32 | 3  | 1  | 1 | 1 |

Selective dynamics

Direct

|                    |                    |                    |   |   |   |
|--------------------|--------------------|--------------------|---|---|---|
| 0.1819400070339938 | 0.5179200200303384 | 0.1152000000018631 | F | F | F |
| 0.6819400070927131 | 0.0179200014037875 | 0.1152000000018631 | F | F | F |
| 0.6798498395080941 | 0.0277987393988894 | 0.2540655932038973 | T | T | T |
| 0.1797087934949246 | 0.5178559073861919 | 0.2619800424630725 | T | T | T |
| 0.9179626080596108 | 0.3782252708988025 | 0.3590277586157384 | T | T | T |
| 0.4093165224449180 | 0.8829893026338169 | 0.3581284081574125 | T | T | T |
| 0.4219059563050038 | 0.6736541977280908 | 0.3489187135267002 | T | T | T |
| 0.9174708825762750 | 0.1629070503480179 | 0.3497633715406110 | T | T | T |
| 0.9545099696828743 | 0.3957999996524748 | 0.1866900003632566 | F | F | F |
| 0.4545100164061751 | 0.8957999666520209 | 0.1866900003632566 | F | F | F |
| 0.6416923358373410 | 0.7851325297014000 | 0.2652407375760930 | T | T | T |
| 0.1454058690504638 | 0.2863217742711299 | 0.2733825062801074 | T | T | T |
| 0.4545100164061751 | 0.1542000069403500 | 0.1726800107755011 | F | F | F |
| 0.9545099696828743 | 0.6542000234215450 | 0.1726800107755011 | F | F | F |
| 0.1454900069574379 | 0.7638599674827660 | 0.1037499962351802 | F | F | F |
| 0.6454899836251471 | 0.2638599840124058 | 0.1037499962351802 | F | F | F |
| 0.1903399943208370 | 0.2862900056299651 | 0.1125700076069052 | F | F | F |
| 0.6903399592441062 | 0.7862899726295041 | 0.1125700076069052 | F | F | F |
| 0.9096599473797582 | 0.8817800337476598 | 0.1725899975309915 | F | F | F |
| 0.4096599940051888 | 0.3817800007264367 | 0.1725899975309915 | F | F | F |
| 0.4096599940051888 | 0.6682199563951130 | 0.1867800022190593 | F | F | F |
| 0.9096599473797582 | 0.1682200058663881 | 0.1867800022190593 | F | F | F |
| 0.6898568949717259 | 0.2650099333511093 | 0.2531028441654399 | T | T | T |
| 0.1865546314091446 | 0.7618179828700917 | 0.2528491565809290 | T | T | T |
| 0.4180599929386020 | 0.7820899854364924 | 0.0870100033908230 | F | F | F |
| 0.9180600395836080 | 0.2820900184369464 | 0.0870100033908230 | F | F | F |

|                    |                    |                    |   |   |   |
|--------------------|--------------------|--------------------|---|---|---|
| 0.9164757533130512 | 0.7659127224776157 | 0.2852907616201321 | T | T | T |
| 0.4185409946729663 | 0.2668123860639184 | 0.2830790153698288 | T | T | T |
| 0.6819400070927131 | 0.4224300249338668 | 0.1752299989317905 | F | F | F |
| 0.1819400070339938 | 0.9224299589225708 | 0.1752299989317905 | F | F | F |
| 0.1819400070339938 | 0.1275800053274239 | 0.1841400008182603 | F | F | F |
| 0.6819400070927131 | 0.6275799970331946 | 0.1841400008182603 | F | F | F |
| 0.6475048728576738 | 0.3922153352714943 | 0.3486625559208605 | T | T | T |
| 0.1368907280400080 | 0.8963396749798989 | 0.3516853961022193 | T | T | T |
| 0.9564970106035418 | 0.0115964213093349 | 0.2706975476178854 | T | T | T |
| 0.4570238318900266 | 0.5139616264108398 | 0.2716641593753479 | T | T | T |
| 0.1488408129250658 | 0.6512085194110000 | 0.3630502644627924 | T | T | T |
| 0.6451509444846337 | 0.1504421079117506 | 0.3630152168854721 | T | T | T |
| 0.4545100164061751 | 0.5361400390910305 | 0.0984700048222891 | F | F | F |
| 0.9545099696828743 | 0.0361399978344039 | 0.0984700048222891 | F | F | F |
| 0.4096599940051888 | 0.0137099999541945 | 0.0896599967858833 | F | F | F |
| 0.9096599473797582 | 0.5137100339442853 | 0.0896599967858833 | F | F | F |
| 0.7140713082677337 | 0.9160702470538880 | 0.3674622399671108 | T | T | T |
| 0.3146430804386000 | 0.3916111947559031 | 0.3978914252023955 | T | T | T |
| 0.1999704739114350 | 0.1304011175031192 | 0.3576209696983241 | T | T | T |
| 0.6925338604369102 | 0.6426245092477672 | 0.3620349538860026 | T | T | T |
| 0.8977807514092504 | 0.5388385803953568 | 0.2825210805016312 | T | T | T |
| 0.4065765437966604 | 0.0386948744303837 | 0.2782018996247686 | T | T | T |
| 0.3758579864341414 | 0.6324467980216895 | 0.4929190801346692 | T | T | T |
| 0.7063458536038709 | 0.6599653760661468 | 0.5436944648195166 | T | T | T |
| 0.799999999960821  | 0.7581899815576136 | 0.1902599906343454 | F | F | F |
| 0.3000000233283728 | 0.7918100085159523 | 0.1691199954394378 | F | F | F |
| 0.3000000233283728 | 0.2581899980872535 | 0.1902599906343454 | F | F | F |
| 0.799999999960821  | 0.2918100085747710 | 0.1691199954394378 | F | F | F |
| 0.8336300498524380 | 0.0250000012150693 | 0.1796899987074170 | F | F | F |
| 0.7739579897756386 | 0.2673540711980849 | 0.3494596779865873 | T | T | T |
| 0.3336300032074320 | 0.5249999785261750 | 0.1796899987074170 | F | F | F |
| 0.2641218822136153 | 0.7749815578072585 | 0.3503006808500970 | T | T | T |
| 0.5448532581845811 | 0.9164448931439395 | 0.2812143179386410 | T | T | T |
| 0.5500000000156575 | 0.1331900063373723 | 0.0905399972845800 | F | F | F |
| 0.0336821781470675 | 0.4119447928375592 | 0.2784481721702647 | T | T | T |
| 0.0499999999569383 | 0.6331899898077324 | 0.0905399972845800 | F | F | F |
| 0.7948558140171897 | 0.0442501565101807 | 0.3416549828872775 | T | T | T |
| 0.2814824516825354 | 0.9997483088090249 | 0.3535162663570546 | T | T | T |
| 0.3024907244349322 | 0.5480342671522394 | 0.3439421093509836 | T | T | T |
| 0.7946397508438849 | 0.5012229960632624 | 0.3678049923419522 | T | T | T |
| 0.7610975032133922 | 0.7809549919897449 | 0.3496688640813232 | T | T | T |
| 0.8336300498524380 | 0.5249999785261750 | 0.1796899987074170 | F | F | F |
| 0.2731370922514031 | 0.2646414784647604 | 0.3539196480563334 | T | T | T |
| 0.3336300032074320 | 0.0250000012150693 | 0.1796899987074170 | F | F | F |

|                    |                    |                    |   |   |   |
|--------------------|--------------------|--------------------|---|---|---|
| 0.0485407862888607 | 0.8813057669169240 | 0.2581334200095213 | T | T | T |
| 0.0499999999569383 | 0.1668100002848689 | 0.1116700004375772 | F | F | F |
| 0.5493082411746713 | 0.3817003650466120 | 0.2565664022819547 | T | T | T |
| 0.5500000000156575 | 0.6668099508135938 | 0.1116700004375772 | F | F | F |
| 0.5500000000156575 | 0.4000000197871287 | 0.1011099948343812 | F | F | F |
| 0.0481314665411219 | 0.1475451632437483 | 0.2713034040007898 | T | T | T |
| 0.5500000000156575 | 0.8999999537758328 | 0.1011099948343812 | F | F | F |
| 0.0484809868200387 | 0.6471333944031059 | 0.2720449998850469 | T | T | T |
| 0.0499999999569383 | 0.4000000197871287 | 0.1011099948343812 | F | F | F |
| 0.0499999999569383 | 0.8999999537758328 | 0.1011099948343812 | F | F | F |
| 0.5486686424954073 | 0.6504299654765404 | 0.2672480267337463 | T | T | T |
| 0.5525309269716061 | 0.1491866615589572 | 0.2693238338073130 | T | T | T |
| 0.3139867954136477 | 0.5033730919122732 | 0.4643570161268542 | T | T | T |
| 0.5121699353644900 | 0.4295325700050370 | 0.4181933438291310 | T | T | T |
| 0.5407445883384483 | 0.6443272177866746 | 0.4310701175401235 | T | T | T |
| 0.7042342866084113 | 0.4872881146419488 | 0.4856723815152080 | T | T | T |
| 0.6609884994226363 | 0.6179871682878684 | 0.4994310115655267 | T | T | T |
| 0.4062053197807174 | 0.6315766733119048 | 0.5370275832975508 | T | T | T |

CONTCAR(3) -co+oh-pd4

1.0000000000000000

|                     |                     |                     |
|---------------------|---------------------|---------------------|
| 10.2175998688000007 | 0.0000000000000000  | 0.0000000000000000  |
| 0.0000000000000000  | 14.4497995377000006 | 0.0000000000000000  |
| 0.0000000000000000  | 0.0000000000000000  | 20.9857006073000001 |

| O  | In | Pd | C | H |
|----|----|----|---|---|
| 50 | 32 | 4  | 1 | 1 |

Selective dynamics

Direct

|                    |                    |                    |   |   |   |
|--------------------|--------------------|--------------------|---|---|---|
| 0.1819400070339938 | 0.5179200200303384 | 0.1152000000018631 | F | F | F |
| 0.6819400070927131 | 0.0179200014037875 | 0.1152000000018631 | F | F | F |
| 0.6792557781462492 | 0.0276539980587600 | 0.2541054125377329 | T | T | T |
| 0.1795660422558569 | 0.5175370091105336 | 0.2619783449035964 | T | T | T |
| 0.9188757253969513 | 0.3782333398551430 | 0.3598107739129617 | T | T | T |
| 0.4088039703596706 | 0.8826009622580173 | 0.3582552115423780 | T | T | T |
| 0.4223217148421199 | 0.6726164062418292 | 0.3501371054056435 | T | T | T |
| 0.9173743079053693 | 0.1627686578882361 | 0.3496742166179843 | T | T | T |
| 0.9545099696828743 | 0.3957999996524748 | 0.1866900003632566 | F | F | F |
| 0.4545100164061751 | 0.8957999666520209 | 0.1866900003632566 | F | F | F |
| 0.6413732303826905 | 0.7851191613391606 | 0.2653014279921777 | T | T | T |
| 0.1449515759363891 | 0.2862234722175572 | 0.2732175677150934 | T | T | T |
| 0.4545100164061751 | 0.1542000069403500 | 0.1726800107755011 | F | F | F |
| 0.9545099696828743 | 0.6542000234215450 | 0.1726800107755011 | F | F | F |
| 0.1454900069574379 | 0.7638599674827660 | 0.1037499962351802 | F | F | F |

|                    |                    |                    |   |   |   |
|--------------------|--------------------|--------------------|---|---|---|
| 0.6454899836251471 | 0.2638599840124058 | 0.1037499962351802 | F | F | F |
| 0.1903399943208370 | 0.2862900056299651 | 0.1125700076069052 | F | F | F |
| 0.6903399592441062 | 0.7862899726295041 | 0.1125700076069052 | F | F | F |
| 0.9096599473797582 | 0.8817800337476598 | 0.1725899975309915 | F | F | F |
| 0.4096599940051888 | 0.3817800007264367 | 0.1725899975309915 | F | F | F |
| 0.4096599940051888 | 0.6682199563951130 | 0.1867800022190593 | F | F | F |
| 0.9096599473797582 | 0.1682200058663881 | 0.1867800022190593 | F | F | F |
| 0.6895352543865272 | 0.2646087616988879 | 0.2529184987910114 | T | T | T |
| 0.1869125735424575 | 0.7616736051941686 | 0.2529597073801781 | T | T | T |
| 0.4180599929386020 | 0.7820899854364924 | 0.0870100033908230 | F | F | F |
| 0.9180600395836080 | 0.2820900184369464 | 0.0870100033908230 | F | F | F |
| 0.9166969813577595 | 0.7659522099113332 | 0.2848676710971816 | T | T | T |
| 0.4180371506814851 | 0.2669335551873431 | 0.2831773438544261 | T | T | T |
| 0.6819400070927131 | 0.4224300249338668 | 0.1752299989317905 | F | F | F |
| 0.1819400070339938 | 0.9224299589225708 | 0.1752299989317905 | F | F | F |
| 0.1819400070339938 | 0.1275800053274239 | 0.1841400008182603 | F | F | F |
| 0.6819400070927131 | 0.6275799970331946 | 0.1841400008182603 | F | F | F |
| 0.6500480396377526 | 0.3925897382373051 | 0.3471797140622925 | T | T | T |
| 0.1362707932271761 | 0.8960194061362188 | 0.3517851977946265 | T | T | T |
| 0.9564441310388858 | 0.0114584587168167 | 0.2706788836658589 | T | T | T |
| 0.4567935464518058 | 0.5142241715729341 | 0.2715632735788560 | T | T | T |
| 0.1488000445679347 | 0.6509056904180568 | 0.3628572375178791 | T | T | T |
| 0.6451311582094803 | 0.1507494050146292 | 0.3630704645619360 | T | T | T |
| 0.4545100164061751 | 0.5361400390910305 | 0.0984700048222891 | F | F | F |
| 0.9545099696828743 | 0.0361399978344039 | 0.0984700048222891 | F | F | F |
| 0.4096599940051888 | 0.0137099999541945 | 0.0896599967858833 | F | F | F |
| 0.9096599473797582 | 0.5137100339442853 | 0.0896599967858833 | F | F | F |
| 0.7138489697473531 | 0.9163294139088975 | 0.3677611346509408 | T | T | T |
| 0.3128919609697718 | 0.3922528171690161 | 0.3978654909782833 | T | T | T |
| 0.2000271076842779 | 0.1305482306945436 | 0.3575874484548862 | T | T | T |
| 0.6924179296979887 | 0.6446571435229131 | 0.3636895852443800 | T | T | T |
| 0.8974907386119853 | 0.5386939955140946 | 0.2825695592111472 | T | T | T |
| 0.4060474752561376 | 0.0384211523812752 | 0.2783332079945637 | T | T | T |
| 0.7084218510628375 | 0.6609917081119860 | 0.5447035870938848 | T | T | T |
| 0.3726305627330504 | 0.6325881414190562 | 0.4934725145786487 | T | T | T |
| 0.799999999960821  | 0.7581899815576136 | 0.1902599906343454 | F | F | F |
| 0.3000000233283728 | 0.7918100085159523 | 0.1691199954394378 | F | F | F |
| 0.3000000233283728 | 0.2581899980872535 | 0.1902599906343454 | F | F | F |
| 0.799999999960821  | 0.2918100085747710 | 0.1691199954394378 | F | F | F |
| 0.8336300498524380 | 0.0250000012150693 | 0.1796899987074170 | F | F | F |
| 0.7743584054186528 | 0.2674340048060486 | 0.3492121051359689 | T | T | T |
| 0.3336300032074320 | 0.5249999785261750 | 0.1796899987074170 | F | F | F |
| 0.2638487034088683 | 0.7745404571855659 | 0.3504761408721251 | T | T | T |
| 0.5441380104294140 | 0.9162781224305192 | 0.2812596723727054 | T | T | T |



|                    |                    |                    |   |   |   |
|--------------------|--------------------|--------------------|---|---|---|
| 0.550000000156575  | 0.1331900063373723 | 0.0905399972845800 | F | F | F |
| 0.0330411083036992 | 0.4118345470505957 | 0.2786657482918073 | T | T | T |
| 0.049999999569383  | 0.6331899898077324 | 0.0905399972845800 | F | F | F |
| 0.7944646993578246 | 0.0443426187808456 | 0.3415702915810428 | T | T | T |
| 0.2808662568822058 | 0.9989101300176202 | 0.3539299292641971 | T | T | T |
| 0.3012856824419501 | 0.5465168478193903 | 0.3443315670270835 | T | T | T |
| 0.7948125137551258 | 0.5017097325707525 | 0.3685795843140269 | T | T | T |
| 0.7622012698859137 | 0.7817858123901260 | 0.3493826273186542 | T | T | T |
| 0.8336300498524380 | 0.5249999785261750 | 0.1796899987074170 | F | F | F |
| 0.2721545275187864 | 0.2653498520139124 | 0.3540003853336060 | T | T | T |
| 0.3336300032074320 | 0.0250000012150693 | 0.1796899987074170 | F | F | F |
| 0.0488518396290445 | 0.8812292300537123 | 0.2579468571142272 | T | T | T |
| 0.049999999569383  | 0.1668100002848689 | 0.1116700004375772 | F | F | F |
| 0.5491926851421098 | 0.3816532932021914 | 0.2563397630334379 | T | T | T |
| 0.550000000156575  | 0.6668099508135938 | 0.1116700004375772 | F | F | F |
| 0.550000000156575  | 0.4000000197871287 | 0.1011099948343812 | F | F | F |
| 0.0482592990405664 | 0.1474044180469392 | 0.2713390691503790 | T | T | T |
| 0.550000000156575  | 0.8999999537758328 | 0.1011099948343812 | F | F | F |
| 0.0483687017333807 | 0.6468396822079185 | 0.2719084753522623 | T | T | T |
| 0.049999999569383  | 0.4000000197871287 | 0.1011099948343812 | F | F | F |
| 0.049999999569383  | 0.8999999537758328 | 0.1011099948343812 | F | F | F |
| 0.5484850342862657 | 0.6504138322307753 | 0.2674846694736033 | T | T | T |
| 0.5517541663052370 | 0.1491415545973425 | 0.2695659423043111 | T | T | T |
| 0.3157103103464536 | 0.5026321135059320 | 0.4645749242041717 | T | T | T |
| 0.5161280483303159 | 0.4341206032730227 | 0.4154429621917046 | T | T | T |
| 0.7045559482897374 | 0.4917360988092767 | 0.4877372342044382 | T | T | T |
| 0.5388551674887836 | 0.6446523028503321 | 0.4319701959031192 | T | T | T |
| 0.6587323374750511 | 0.6232483335147521 | 0.5001929485843064 | T | T | T |
| 0.4021047202774994 | 0.6323191376046609 | 0.5376849214340709 | T | T | T |
