# Supplementary material for: H-assisted CO2 dissociation on PdnPt(4−n)/In2O3 catalysts: a density functional theory study
Source: Royal Society of Chemistry journal article supplement (doi:10.1039/d4cp02389g), 2024-01-01
Supplement: d4cp02389g2.pdf [file d4cp02389g2.pdf]

## Supplementary Materials for

# H-Assisted CO<sub>2</sub> Dissociation on Pd<sub>n</sub>Pt<sub>(4-n)</sub>/In<sub>2</sub>O<sub>3</sub> Catalysts: A Density Functional Theory Study

Xiaowen Wang<sup>1</sup>, Jiaying Pan<sup>1, \*</sup>, Haiqiao Wei<sup>1,2, \*</sup>, Wenjia Li<sup>4</sup>, Jun Zhao<sup>2,3</sup>, Zhen Hu<sup>1</sup>

*1 State Key Laboratory of Engines, Tianjin University, Tianjin 300071, China*

*2 National Industry-Education Platform of Energy Storage, Tianjin University,*

*Tianjin 300072, China*

*3 Key Laboratory of Efficient Utilization of Low and Medium Grade Energy, Tianjin*

*University, Tianjin 300071, China*

*4 Department of Mechanical and Energy Engineering, Southern University of Science*

*and Technology, Shenzhen 518055, China*

**Corresponding author:** Haiqiao Wei

**E-mail:** whq@tju.edu.cn

Table S1. Bader charge ( $\delta$ ) for the COOH-mediated channel on the Pd<sub>n</sub>Pt<sub>(4-n)</sub>/In<sub>2</sub>O<sub>3</sub> catalysts.

|                    |                  | Pt <sub>4</sub> | PdPt <sub>3</sub> | Pd <sub>2</sub> Pt <sub>2</sub> | Pd <sub>3</sub> Pt | Pd <sub>4</sub> |
|--------------------|------------------|-----------------|-------------------|---------------------------------|--------------------|-----------------|
| CO <sub>2</sub> +H | cluster          | -0.60           | -0.70             | -0.72                           | -0.65              | -0.75           |
|                    | *H               | -0.04           | 0.05              | 0.06                            | 0.07               | 0.08            |
|                    | *CO <sub>2</sub> | 0.53            | 0.51              | 0.48                            | 0.42               | 0.39            |
| TS1                | cluster          | -0.41           | -0.53             | -0.50                           | -0.45              | -0.51           |
|                    | *H               | -0.23           | -0.25             | -0.26                           | -0.28              | -0.27           |
|                    | *CO <sub>2</sub> | 0.57            | 0.57              | 0.55                            | 0.51               | 0.56            |
| <i>trans</i> -COOH | cluster          | -0.35           | -0.45             | -0.45                           | -0.41              | -0.48           |
|                    | *COOH            | 0.19            | 0.20              | 0.17                            | 0.15               | 0.21            |
| TS2                | cluster          | -0.43           | -0.49             | -0.50                           | -0.46              | -0.66           |
|                    | *COOH            | 0.20            | 0.21              | 0.19                            | 0.16               | 0.38            |
| <i>cis</i> -COOH   | cluster          | -0.53           | -0.54             | -0.55                           | -0.52              | -0.58           |
|                    | *COOH            | 0.29            | 0.24              | 0.22                            | 0.18               | 0.25            |
| TS3                | cluster          | -0.48           | -0.49             | -0.53                           | -0.73              | -0.89           |
|                    | *CO+*OH          | 0.36            | 0.33              | 0.32                            | 0.41               | 0.42            |
| CO+OH              | cluster          | -0.97           | -1.01             | -1.05                           | -1.07              | -1.17           |
|                    | *CO+*OH          | 0.60            | 0.63              | 0.62                            | 0.61               | 0.60            |

Table S2. Reaction barriers ( $E_b$ , eV) and energies ( $\Delta E$ , eV) of the C-O bond cleavage processes on the  $\text{In}_2\text{O}_3$  (110) surface.

|    | $E_b$ | $\Delta E$ |
|----|-------|------------|
| R1 | 1.74  | 0.77       |
| R2 | 0.34  | -0.11      |
| R3 | 2.93  | 2.49       |
| R4 | 2.86  | 2.32       |
| R5 | 2.05  | 1.21       |
| R6 | 3.80  | 2.89       |

Table S3. Reaction barriers ( $E_b$ , eV) and energies ( $\Delta E$ , eV) of the H-assisted CO<sub>2</sub> dissociation channels on the Pd<sub>n</sub>Pt<sub>(4-n)</sub>/In<sub>2</sub>O<sub>3</sub> catalysts considering the solvation effect.

|                                 | <i>R1</i> |            | <i>R2</i> |            | <i>R3</i> |            | <i>R4</i> |            | <i>R5</i> |            |
|---------------------------------|-----------|------------|-----------|------------|-----------|------------|-----------|------------|-----------|------------|
|                                 | $E_b$     | $\Delta E$ |
| Pt <sub>4</sub>                 | 0.38      | -0.18      | 0.58      | 0.18       | 2.24      | -0.26      | 1.35      | 0.29       | 2.81      | 1.12       |
| PdPt <sub>3</sub>               | 0.67      | -0.19      | 0.54      | 0.05       | 1.80      | -0.34      | 0.94      | -0.01      | 2.59      | 0.74       |
| Pd <sub>2</sub> Pt <sub>2</sub> | 0.66      | 0.18       | 0.45      | 0.11       | 1.75      | -0.56      | 1.17      | 0.10       | 2.39      | 0.43       |
| Pd <sub>3</sub> Pt              | 0.67      | 0.16       | 0.45      | 0.07       | 0.90      | -0.96      | 0.85      | 0.01       | 1.77      | 0.69       |
| Pd <sub>4</sub>                 | 0.69      | 0.36       | 0.60      | 0.20       | 0.97      | -0.92      | 1.00      | 0.24       | 2.13      | 0.55       |

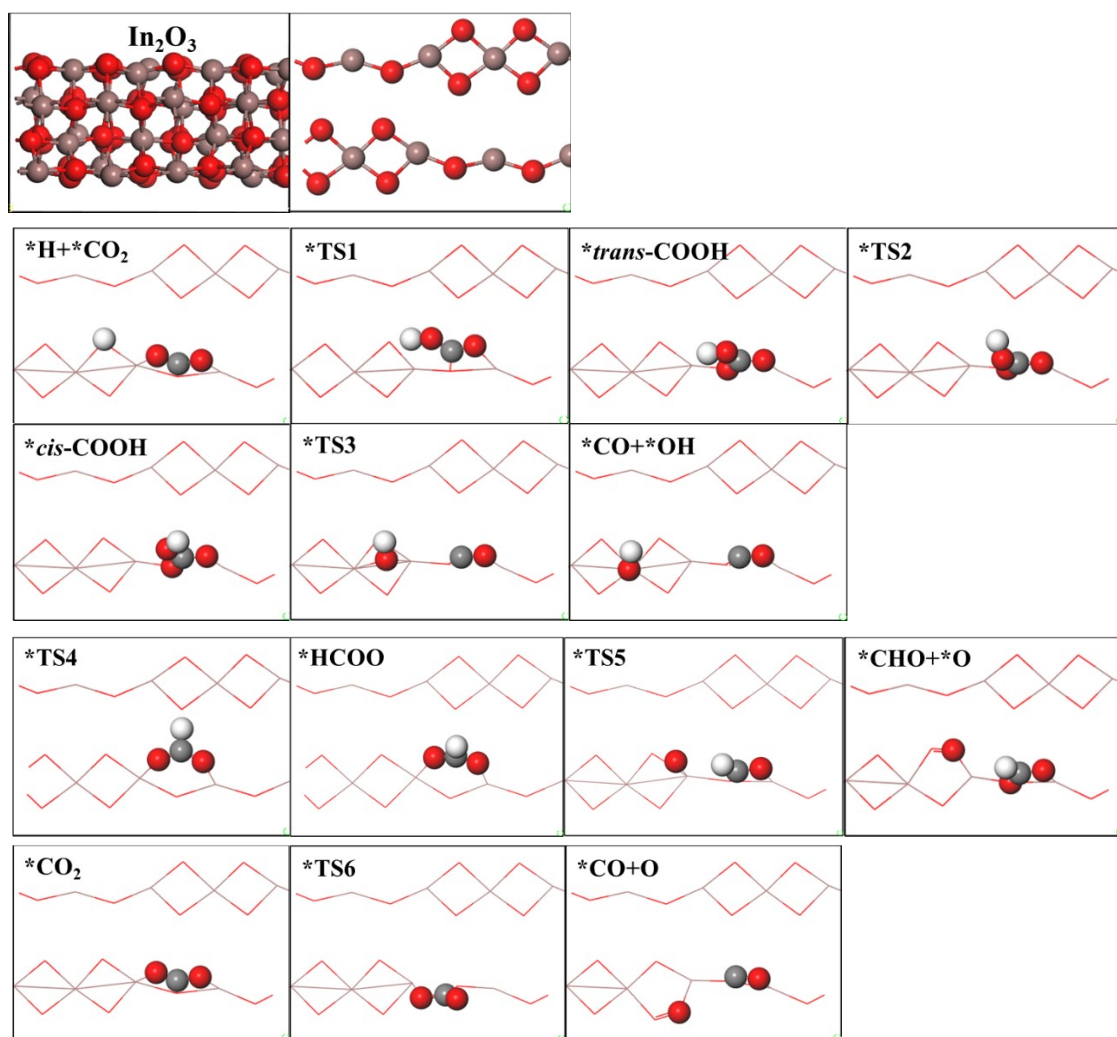

Fig. S1. Structures of the stationary points of the C-O cleavage channels on the In<sub>2</sub>O<sub>3</sub> (110) surface.
